# Supplementary material for: Effectiveness of the application of an electronic medication management support system in patients with polypharmacy in general practice: a study protocol of cluster-randomised controlled trial (AdAM)
Source: PubMed Central journal article supplement — BMJ Open. 2021 Sep 28;11(9):e048191. doi: 10.1136/bmjopen-2020-048191 (PMC8479941; doi:10.1136/bmjopen-2020-048191), 2021-09-28
Supplement: bmjopen-2020-048191.draft_revisions.pdf [file bmjopen-2020-048191.draft_revisions.pdf]

# BMJ Open

BMJ Open is committed to open peer review. As part of this commitment we make the peer review history of every article we publish publicly available.

When an article is published we post the peer reviewers' comments and the authors' responses online. We also post the versions of the paper that were used during peer review. These are the versions that the peer review comments apply to.

The versions of the paper that follow are the versions that were submitted during the peer review process. They are not the versions of record or the final published versions. They should not be cited or distributed as the published version of this manuscript.

BMJ Open is an open access journal and the full, final, typeset and author-corrected version of record of the manuscript is available on our site with no access controls, subscription charges or pay-per-view fees (<http://bmjopen.bmj.com>).

If you have any questions on BMJ Open's open peer review process please email [info.bmjopen@bmj.com](mailto:info.bmjopen@bmj.com)

# BMJ Open

## Effectiveness of the application of an electronic medication management support system in patients with polypharmacy in general practice: a study protocol of cluster-randomised controlled trial (AdAM).

|                               |                                                                                                                                                                                                                                                                                                                                                                                                                                                                                                                                                                                                                                                                                                                                                                                                                                                                                                                                                                                                                                                                                                                                                                                                                                                                                                                                                                                                                                                                                                                                                                                                                                                                                                                                                                                                                                                                                                                                                                                                                                                                                                                                                     |
|-------------------------------|-----------------------------------------------------------------------------------------------------------------------------------------------------------------------------------------------------------------------------------------------------------------------------------------------------------------------------------------------------------------------------------------------------------------------------------------------------------------------------------------------------------------------------------------------------------------------------------------------------------------------------------------------------------------------------------------------------------------------------------------------------------------------------------------------------------------------------------------------------------------------------------------------------------------------------------------------------------------------------------------------------------------------------------------------------------------------------------------------------------------------------------------------------------------------------------------------------------------------------------------------------------------------------------------------------------------------------------------------------------------------------------------------------------------------------------------------------------------------------------------------------------------------------------------------------------------------------------------------------------------------------------------------------------------------------------------------------------------------------------------------------------------------------------------------------------------------------------------------------------------------------------------------------------------------------------------------------------------------------------------------------------------------------------------------------------------------------------------------------------------------------------------------------|
| Journal:                      | <i>BMJ Open</i>                                                                                                                                                                                                                                                                                                                                                                                                                                                                                                                                                                                                                                                                                                                                                                                                                                                                                                                                                                                                                                                                                                                                                                                                                                                                                                                                                                                                                                                                                                                                                                                                                                                                                                                                                                                                                                                                                                                                                                                                                                                                                                                                     |
| Manuscript ID                 | bmjopen-2020-048191                                                                                                                                                                                                                                                                                                                                                                                                                                                                                                                                                                                                                                                                                                                                                                                                                                                                                                                                                                                                                                                                                                                                                                                                                                                                                                                                                                                                                                                                                                                                                                                                                                                                                                                                                                                                                                                                                                                                                                                                                                                                                                                                 |
| Article Type:                 | Protocol                                                                                                                                                                                                                                                                                                                                                                                                                                                                                                                                                                                                                                                                                                                                                                                                                                                                                                                                                                                                                                                                                                                                                                                                                                                                                                                                                                                                                                                                                                                                                                                                                                                                                                                                                                                                                                                                                                                                                                                                                                                                                                                                            |
| Date Submitted by the Author: | 18-Dec-2020                                                                                                                                                                                                                                                                                                                                                                                                                                                                                                                                                                                                                                                                                                                                                                                                                                                                                                                                                                                                                                                                                                                                                                                                                                                                                                                                                                                                                                                                                                                                                                                                                                                                                                                                                                                                                                                                                                                                                                                                                                                                                                                                         |
| Complete List of Authors:     | <p>Müller, Beate; Goethe University Frankfurt, Institute of General Practice<br/> Klaaßen-Mielke, Renate; Ruhr University, Department of Medical Informatics, Biometry and Epidemiology<br/> GONZALEZ-GONZALEZ, ANA; Goethe University Frankfurt, Institute of General Practice; Red de Investigación en Servicios de Salud en Enfermedades Crónicas (REDISSEC)<br/> Grandt, Daniel ; Clinic Saarbrücken, Department of Internal Medicine<br/> Hammerschmidt, Reinhard; Association of Statutory Health Insurance Physicians, region Westphalia/Lippe<br/> Köberlein-Neu, Juliane; University of Wuppertal, Center for Health Economics and Health Services Research<br/> Kellermann-Mühlhoff, Petra; BARMER<br/> Muth, Christiane; Ruhr University, Department of Medical Informatics, Biometry and Epidemiology<br/> Beckmann, Till; BARMER<br/> Düvel, Lara; BARMER<br/> Surmann, Bastian; Bielefeld University, Department of Health Economics and Health Care Management. Faculty of Health Science.<br/> Flaig, Benno; Goethe University Frankfurt, Institute of General Practice<br/> Ihle, Peter; University of Cologne, PMV Research Group, Department of Child and Adolescence Psychiatry.<br/> Söling, Sara; University of Cologne, Institute for Medical Sociology, Health Services Research and Rehabilitation Science, Department of Health Services Research.<br/> Grandt, Simone; RpDoc Solutions GmbH<br/> Dinh, Truc; Goethe University Frankfurt, Institute of General Practice<br/> Piotrowski, Alexandra; University of Wuppertal, Center for Health Economics and Health Services Research.<br/> Meyer, Ingo; University of Cologne, PMV Research Group, Department of Child and Adolescence Psychiatry<br/> Karbach, Ute; Technical University Dortmund, Department of Rehabilitation Sociology, Faculty of Rehabilitation Sciences<br/> Harder, Sebastian; Goethe University Frankfurt, Institute for Clinical Pharmacology<br/> Perera, Rafael; University of Oxford, Nuffield Department of Primary Care Health Sciences<br/> Glasziou, Paul; Bond University, Centre for Research in Evidence-Based Practice (CREBP)</p> |

1  
2  
3  
4  
5  
6  
7  
8  
9  
10  
11  
12  
13  
14  
15  
16  
17  
18  
19  
20  
21  
22  
23  
24  
25  
26  
27  
28  
29  
30  
31  
32  
33  
34  
35  
36  
37  
38  
39  
40  
41  
42  
43  
44  
45  
46  
47  
48  
49  
50  
51  
52  
53  
54  
55  
56  
57  
58  
59  
60

|                  |                                                                                                                                                                                                                                                                                                                                                                                                                                                                                                                                                                                                                                                                                                          |
|------------------|----------------------------------------------------------------------------------------------------------------------------------------------------------------------------------------------------------------------------------------------------------------------------------------------------------------------------------------------------------------------------------------------------------------------------------------------------------------------------------------------------------------------------------------------------------------------------------------------------------------------------------------------------------------------------------------------------------|
|                  | <p>Pfaff, Holger; University of Cologne, Institute for Medical Sociology, Health Services Research and Rehabilitation Science, Department of Health Services Research</p> <p>Greiner, Wolfgang; Bielefeld University, Department of Health Economics and Health Care Management. Faculty of Health Science.</p> <p>Gerlach, Ferdinand; Goethe University Frankfurt, Institute of General Practice</p> <p>Timmesfeld, Nina; Ruhr University Bochum, Department of Medical Informatics, Biometry &amp; Epidemiology</p> <p>Muth, Christiane; Bielefeld University, Department of General Practice and Family Medicine, Medical Faculty OWL; Goethe University Frankfurt, Institute of General Practice</p> |
| <p>Keywords:</p> | <p>GENERAL MEDICINE (see Internal Medicine), Health &amp; safety &lt; HEALTH SERVICES ADMINISTRATION &amp; MANAGEMENT, Change management &lt; HEALTH SERVICES ADMINISTRATION &amp; MANAGEMENT</p>                                                                                                                                                                                                                                                                                                                                                                                                                                                                                                        |
|                  |                                                                                                                                                                                                                                                                                                                                                                                                                                                                                                                                                                                                                                                                                                          |

SCHOLARONE™  
Manuscripts

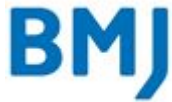

I, the Submitting Author has the right to grant and does grant on behalf of all authors of the Work (as defined in the below author licence), an exclusive licence and/or a non-exclusive licence for contributions from authors who are: i) UK Crown employees; ii) where BMJ has agreed a CC-BY licence shall apply, and/or iii) in accordance with the terms applicable for US Federal Government officers or employees acting as part of their official duties; on a worldwide, perpetual, irrevocable, royalty-free basis to BMJ Publishing Group Ltd ("BMJ") its licensees and where the relevant Journal is co-owned by BMJ to the co-owners of the Journal, to publish the Work in this journal and any other BMJ products and to exploit all rights, as set out in our [licence](#).

The Submitting Author accepts and understands that any supply made under these terms is made by BMJ to the Submitting Author unless you are acting as an employee on behalf of your employer or a postgraduate student of an affiliated institution which is paying any applicable article publishing charge ("APC") for Open Access articles. Where the Submitting Author wishes to make the Work available on an Open Access basis (and intends to pay the relevant APC), the terms of reuse of such Open Access shall be governed by a Creative Commons licence – details of these licences and which [Creative Commons](#) licence will apply to this Work are set out in our licence referred to above.

Other than as permitted in any relevant BMJ Author's Self Archiving Policies, I confirm this Work has not been accepted for publication elsewhere, is not being considered for publication elsewhere and does not duplicate material already published. I confirm all authors consent to publication of this Work and authorise the granting of this licence.

1  
2  
3 **1 TITLE**

4  
5 2 Effectiveness of the application of an electronic medication management support system in  
6  
7 3 patients with polypharmacy in general practice: a study protocol of cluster-randomised  
8  
9 4 controlled trial (AdAM).  
10  
11

12 5  
13  
14 **6 AUTHORS**

15  
16 7 Beate S. Müller\*

17  
18 8 Institute of General Practice. Goethe University Frankfurt. Theodor-Stern-Kai 7. 60590  
19  
20 9 Frankfurt am Main. GERMANY.

21  
22 10 Email: [b.mueller@allgemeinmedizin.uni-frankfurt.de](mailto:b.mueller@allgemeinmedizin.uni-frankfurt.de)  
23  
24  
25

26 11  
27 12 Renate Klaassen-Mielke\*

28  
29 13 Department of Medical Informatics, Biometry and Epidemiology. Ruhr University.  
30  
31 14 Universitätsstrasse 105, 44780 Bochum. GERMANY.

32  
33 15 Email: [Klaassen-Mielke@amib.ruhr-uni-bochum.de](mailto:Klaassen-Mielke@amib.ruhr-uni-bochum.de)  
34  
35

36 16  
37 17 Ana I. González-González

38  
39 18 Institute of General Practice. Goethe University Frankfurt. Theodor-Stern-Kai 7. 60590  
40  
41 19 Frankfurt am Main. GERMANY.

42  
43 20 Red de Investigación en Servicios de Salud en Enfermedades Crónicas (REDISSEC), Madrid,  
44  
45 21 SPAIN.

46  
47 22 Email: [gonzalezgonzalez@allgemeinmedizin.uni-frankfurt.de](mailto:gonzalezgonzalez@allgemeinmedizin.uni-frankfurt.de)  
48  
49

50 23  
51 24 Daniel Grandt

52  
53 25 Department of Internal Medicine. Clinic Saarbrücken. Winterberg 1, 66119 Saarbrücken.  
54  
55 26 GERMANY.  
56  
57  
58  
59  
60

1  
2  
3 27 Email: [danielgrandt@aol.com](mailto:danielgrandt@aol.com)  
4

5 28  
6

7 29 Reinhard Hammerschmidt  
8

9 30 Association of Statutory Health Insurance Physicians, region Westphalia/Lippe. Robert-  
10

11 31 Schimrigk-Str. 4-6, 44141 Dortmund. GERMANY.  
12

13 32 Email: [reinhard.hammerschmidt@kvwl.de](mailto:reinhard.hammerschmidt@kvwl.de)  
14

15 33  
16

17 34 Juliane Köberlein  
18

19 35 Center for Health Economics and Health Services Research. University of Wuppertal. Rainer-  
20

21 36 Gruenter-Str. 21, 42119 Wuppertal. GERMANY.  
22

23 37 Email: [koeberlein@wiwi.uni-wuppertal.de](mailto:koeberlein@wiwi.uni-wuppertal.de)  
24

25 38  
26

27 39 Petra Kellermann-Mühlhoff  
28

29 40 BARMER. Lichtscheider Str. 89, 42285 Wuppertal. GERMANY.  
30

31 41 Email: [petra.kellermann-muehlhoff@barmer.de](mailto:petra.kellermann-muehlhoff@barmer.de)  
32

33 42  
34

35 43 Hans-Joachim Trampisch  
36

37 44 Department of Medical Informatics, Biometry and Epidemiology. Ruhr University.  
38

39 45 Universitätsstrasse 105, 44780 Bochum. GERMANY.  
40

41 46 Email: [trampisch@amib.ruhr-uni-bochum.de](mailto:trampisch@amib.ruhr-uni-bochum.de)  
42

43 47  
44

45 48 Till Beckmann  
46

47 49 BARMER. Lichtscheider Str. 89, 42285 Wuppertal. GERMANY.  
48

49 50 Email: [till.beckmann@barmer.de](mailto:till.beckmann@barmer.de)  
50

51 51  
52

53 52 Lara Düvel  
54  
55  
56  
57  
58  
59  
60

- 1  
2  
3 53 BARMER. Lichtscheider Str. 89, 42285 Wuppertal. GERMANY.  
4  
5 54 Email: [lara.duevel@barmer.de](mailto:lara.duevel@barmer.de)  
6  
7 55  
8  
9 56 Bastian Surmann  
10  
11 57 Department of Health Economics and Health Care Management. Faculty of Health Science.  
12  
13 58 Bielefeld University. Universitätsstrasse 25, 33615 Bielefeld. GERMANY.  
14  
15 59 Email: [bastian.surmann@uni-bielefeld.de](mailto:bastian.surmann@uni-bielefeld.de)  
16  
17 60  
18  
19 61 Benno Flaig  
20  
21 62 Institute of General Practice. Goethe University Frankfurt. Theodor-Stern-Kai 7. 60590  
22  
23 63 Frankfurt am Main. GERMANY.  
24  
25 64 Email: [flaig@posteo.de](mailto:flaig@posteo.de)  
26  
27 65  
28  
29 66 Peter Ihle  
30  
31 67 PMV Research Group, Department of Child and Adolescence Psychiatry. University of Cologne.  
32  
33 68 Herderstrasse 52, 50931 Cologne. GERMANY.  
34  
35 69 Email: [peter.ihle@uk-koeln.de](mailto:peter.ihle@uk-koeln.de)  
36  
37 70  
38  
39 71 Sara Söling  
40  
41 72 Institute for Medical Sociology, Health Services Research and Rehabilitation Science,  
42  
43 73 Department of Health Services Research, University of Cologne. Eupener Str. 129, 50933  
44  
45 74 Cologne. GERMANY.  
46  
47 75 Email: [sara.soeling@uk-koeln.de](mailto:sara.soeling@uk-koeln.de)  
48  
49 76  
50  
51 77 Simone Grandt  
52  
53 78 RpDoc Solutions GmbH. GERMANY  
54  
55  
56  
57  
58  
59  
60

1  
2  
3 79 Email: s.grandt@rpdoc.de  
4

5 80  
6

7 81 Truc S. Dinh  
8

9 82 Institute of General Practice. Goethe University Frankfurt. Theodor-Stern-Kai 7. 60590  
10

11 83 Frankfurt am Main. GERMANY.  
12

13 84 Email: dinh@allgemeinmedizin.uni-frankfurt.de  
14

15 85  
16

17 86 Alexandra Piotrowski  
18

19 87 Center for Health Economics and Health Services Research. University of Wuppertal. Rainer-  
20

21 88 Gruenter-Str. 21, 42119 Wuppertal. GERMANY.  
22

23 89 Email: piotrowski@wiwi.uni-wuppertal.de  
24

25 90  
26

27 91 Ingo Meyer  
28

29 92 PMV Research Group, Department of Child and Adolescence Psychiatry. University of Cologne.  
30

31 93 Herderstrasse 52, 50931 Cologne. GERMANY.  
32

33 94 Email: ingo.meyer@uk-koeln.de  
34

35 95  
36

37 96 Ute Karbach  
38

39 97 Department of Rehabilitation Sociology, Faculty of Rehabilitation Sciences, Technical  
40

41 98 University Dortmund, Emil-Figge-Strasse 50, 44227 Dortmund. GERMANY.  
42

43 99 Email: [ute.karbach@tu-dortmund.de](mailto:ute.karbach@tu-dortmund.de)  
44

45 100  
46

47 101 Sebastian Harder  
48

49 102 Institute for Clinical Pharmacology. Goethe University Frankfurt. Theodor-Stern-Kai 7. 60590  
50

51 103 Frankfurt am Main. GERMANY.  
52

53 104 Email: harder@em.uni-frankfurt.de  
54



- 1  
2  
3 105  
4  
5 106 Rafael Perera  
6  
7 107 Nuffield Department of Primary Care Health Sciences. University of Oxford. Radcliffe  
8  
9 108 Observatory Quarter. Woodstock Road, Oxford. OX2 6GG, UK.  
10  
11  
12 109 Email: [Rafael.perera@phc.ox.ac.uk](mailto:Rafael.perera@phc.ox.ac.uk)  
13  
14 110  
15  
16 111 Paul P. Glasziou  
17  
18 112 Centre for Research in Evidence-Based Practice (CREBP). Bond University. Robina QLD 4229,  
19  
20 113 AUSTRALIA.  
21  
22 114 Email: [pglaszio@bond.edu.au](mailto:pglaszio@bond.edu.au)  
23  
24 115  
25  
26 116 Holger Pfaff  
27  
28 117 Institute for Medical Sociology, Health Services Research and Rehabilitation Science,  
29  
30 118 Department of Health Services Research, University of Cologne. Eupener Str. 129, 50933  
31  
32 119 Cologne. GERMANY.  
33  
34 120 Email: [holger.pfaff@uk-koeln.de](mailto:holger.pfaff@uk-koeln.de)  
35  
36 121  
37  
38 122 Wolfgang Greiner  
39  
40 123 Department of Health Economics and Health Care Management. Faculty of Health Science.  
41  
42 124 Bielefeld University. Universitätsstrasse 25, 33615 Bielefeld. GERMANY.  
43  
44 125 Email: [wolfgang.greiner@uni-bielefeld.de](mailto:wolfgang.greiner@uni-bielefeld.de)  
45  
46 126  
47  
48 127 Ferdinand M. Gerlach  
49  
50 128 Institute of General Practice. Goethe University Frankfurt. Theodor-Stern-Kai 7. 60590  
51  
52 129 Frankfurt am Main. GERMANY.  
53  
54 130 Email: [gerlach@allgemeinmedizin.uni-frankfurt.de](mailto:gerlach@allgemeinmedizin.uni-frankfurt.de)  
55  
56  
57  
58  
59  
60

1  
2  
3 131

4  
5 132 Nina Timmesfeld\*\*

6  
7 133 Department of Medical Informatics, Biometry and Epidemiology. Ruhr University.

8  
9 134 Universitätsstrasse 105, 44780 Bochum. GERMANY.

10  
11 135 Email: [timmesfeld@amib.ruhr-uni-bochum.de](mailto:timmesfeld@amib.ruhr-uni-bochum.de)

12  
13  
14 136

15  
16 137 Christiane Muth\*\*

17  
18 138 Department of General Practice and Family Medicine, Medical Faculty OWL, Bielefeld

19  
20 139 University. Universitätsstr. 25, 33615 Bielefeld. GERMANY.

21  
22 140 Email: [christiane.muth@uni-bielefeld.de](mailto:christiane.muth@uni-bielefeld.de)

23  
24 141 Institute of General Practice. Goethe University Frankfurt. Theodor-Stern-Kai 7, 60590

25  
26 142 Frankfurt am Main. GERMANY.

27  
28 143 Email: [muth@allgemeinmedizin.uni-frankfurt.de](mailto:muth@allgemeinmedizin.uni-frankfurt.de)

29  
30  
31  
32 144

33  
34 145 & AdAM Study Group

35  
36 146

37  
38 147 \*Shared first authorship

39  
40 148 \*\*Shared last authorship

41  
42  
43 149

44  
45 150 **CORRESPONDING AUTHOR**

46  
47 151 González-González, Ana Isabel

48  
49 152 Institute of General Practice. Goethe University. Theodor-Stern-Kai 7. 60590 Frankfurt am

50  
51 153 Main. GERMANY.

52  
53 154 Email: [gonzalezgonzalez@allgemeinmedizin.uni-frankfurt.de](mailto:gonzalezgonzalez@allgemeinmedizin.uni-frankfurt.de)

54  
55  
56  
57  
58  
59  
60

155 **ABSTRACT**

156 **Introduction:** Clinically complex patients often require multiple medications. Polypharmacy is  
157 associated with inappropriate prescriptions which may lead to negative outcomes. Few  
158 effective tools are available to help physicians optimise patient medication. This study assesses  
159 whether an electronic medication management support system (eMMA<sup>®</sup>) reduces  
160 hospitalisation and mortality and improves prescription quality/safety in patients with  
161 polypharmacy.

162 **Methods and analysis:** Planned design: Pragmatic, parallel cluster-randomised controlled trial;  
163 general practices as randomisation unit; patients as analysis unit. As practice recruitment was  
164 poor, we included additional data to our primary endpoint analysis for practices and quarters  
165 from 10/2017 to 9/2020. Since randomisation was performed in waves, final study design  
166 corresponds to a stepped-wedge design with open-cohort and step-length of one quarter.

167 **Scope:** General practices, Westphalia-Lippe (Germany), caring for BARMER health-fund  
168 covered patients. **Population:** Patients ( $\geq 18$  years) with polypharmacy ( $\geq 5$  prescriptions).  
169 **Sample size:** Initially, 32 patients from each of 539 practices were required for each study arm  
170 (17,200 patients/arm), but only 688 practices were randomised after two-year recruitment.

171 **Design change** ensures 80% power is nonetheless achieved. **Intervention:** Complex  
172 intervention eMMA<sup>®</sup>. **Follow-up:** At least five quarters/cluster (practice). **Recruitment:**  
173 Practices recruited/randomised at different times; after follow-up, control-group practices  
174 may access eMMA<sup>®</sup>. **Outcomes:** Primary endpoint is all-cause mortality and hospitalisation;  
175 secondary endpoints are number of potentially inappropriate medications, cause-specific  
176 hospitalisation preceded by high-risk prescribing, and medication underuse. **Statistical analysis:**  
177 Primary and secondary outcomes are measured quarterly at patient level. A generalised linear  
178 mixed-effect model and repeated patient measurements are used to consider patient clusters  
179 within practices. Time and intervention group are considered fixed factors; variation between

1  
2  
3 180 practices and patients is fitted as random effects. Intention-to-treat principle is used to analyse  
4  
5 181 primary and key secondary endpoints.  
6

7 182 **Ethics and dissemination:** Trial approved by Ethics Commission of North-Rhine Medical  
8  
9 183 Association. Results will be disseminated through workshops, peer-reviewed publications, local  
10  
11 184 and international conferences.  
12

13  
14 185 **Registration:** ClinicalTrials.gov, NCT03430336. Registered on February 6, 2018.  
15

16 186 <https://clinicaltrials.gov/ct2/show/NCT03430336>  
17  
18  
19  
20  
21  
22  
23  
24  
25  
26  
27  
28  
29  
30  
31  
32  
33  
34  
35  
36  
37  
38  
39  
40  
41  
42  
43  
44  
45  
46  
47  
48  
49  
50  
51  
52  
53  
54  
55  
56  
57  
58  
59  
60

1  
2  
3 187 **Strengths and limitations of this study**  
4

5 188 - We will provide evidence of the effectiveness of an electronic medication management  
6  
7 189 support system in reducing mortality and hospitalization in adult patients with  
8  
9 190 polypharmacy in real-life general practice.  
10

11  
12 191 - The intervention concept is innovative, as it is the first time that information based on  
13  
14 192 claims data is made available to general practitioners (in Germany) in the form of an  
15  
16 193 electronic tool.  
17

18  
19 194 - However, claims-based outcome measures also have disadvantages, as data are collected  
20  
21 195 for the purpose of reimbursement, which limits the choice of outcomes.  
22

23 196 - A stepped-wedge cluster-randomised design with an open cohort will allow us to  
24  
25 197 overcome insufficient recruitment.  
26

27 198 - We included a time variable to adjust for confounding time effects and overcome such  
28  
29 199 methodological shortcomings of stepped-wedge design.  
30  
31  
32  
33  
34  
35  
36  
37  
38  
39  
40  
41  
42  
43  
44  
45  
46  
47  
48  
49  
50  
51  
52  
53  
54  
55  
56  
57  
58  
59  
60

## 200 INTRODUCTION

201 Multiple medications are often required to manage clinically complex patients. Clinicians are  
202 frequently challenged by the need to ensure that treatment of complex patients adheres to  
203 disease-specific clinical practice guidelines.

204 Polypharmacy, defined as the use of five or more medications (1), increases the potential for  
205 the prescription of potentially inappropriate medications (PIMs) due to the non-consideration  
206 of drug-drug or drug-disease interactions, inappropriate dosages (perhaps due to the age of  
207 the patient), as well as unintended duplicate prescriptions (2–6). The use of greater numbers  
208 of drug therapies has been associated with increased risk of adverse drug reactions (ADR) (7)  
209 irrespective of age (8). It has also been associated with increased risk of hospital admissions  
210 (9–11), hip fractures in older adults (12), and higher costs and mortality (10,11,13).

211 In line with the increasing number and complexity of medications, polypharmacy is associated  
212 with reduced medication adherence in patients. It may also result in under-treatment,  
213 particularly in the elderly, in whom too few prescriptions and excessively low dosages have  
214 been reported (14–16).

215 Medication errors and omissions are important problems facing routine care in general  
216 practice, especially in patients with multimorbidity and multiple prescriptions (17–19). As most  
217 medication errors and omissions are preventable, raising physicians' awareness of  
218 polypharmacy may help to ensure the safe, effective and appropriate use of medication (19–  
219 21).

220 Few effective instruments are available to help physicians systematically monitor and optimise  
221 the medications their patients take (21). To ensure patients receive high-quality healthcare,  
222 physicians should be provided with tools that help them avoid risks in the treatment of their  
223 patients (21–23). Likewise, physicians should have access to continuously available data on  
224 quality-oriented aspects to support the control of their patients' treatments (23).

225 Computerised Decision Support Systems (CDSS) are computer-based systems providing

1  
2  
3 226 “passive and active referential information as well as reminders, alerts, and guidelines” (24). A  
4  
5 227 recent systematic review (25) concluded that although CDSS may reduce PIMs, additional  
6  
7 228 randomised controlled trials are needed to assess their impact on patient-relevant outcomes  
8  
9 229 and to evaluate the use of medication targets such as the Screening Tool of Older People’s  
10  
11 230 Prescriptions (STOPP) and the Screening Tool to Alert doctors to the Right Treatment (START)  
12  
13 231 criteria (26).

14  
15  
16 232 The primary objective of the AdAM [Anwendung für digital unterstütztes Arzneimitteltherapie-  
17  
18 233 Management] trial is therefore to assess whether an electronic medication management  
19  
20 234 support system (complex intervention) reduces the combined endpoint of all-cause mortality  
21  
22 235 and all-cause hospital admissions in patients with polypharmacy, compared to usual care and  
23  
24 236 in the real context of a general practice setting. Sub-studies to be performed will include cost-  
25  
26 237 effectiveness analysis, the analysis of barriers and facilitators through interviews and focus  
27  
28 238 groups with practitioners and interviews with patients, a trial process evaluation, as well as  
29  
30 239 sustainability analysis and quality cost accounting systems to explore the relationship between  
31  
32 240 organisational context, implementation process and quality of care (Additional file 1).

33  
34  
35 241 However, as this study protocol focuses on the AdAM intervention, these sub-studies will not  
36  
37 242 be explained in detail in this paper

38  
39  
40 243 [About here link to Additional file 1: Brief description of AdAM sub-studies]

41  
42  
43 244

#### 44 45 245 **AIMS**

46  
47 246 The AdAM trial aims to:

- 48  
49 247 1. Evaluate whether the complex intervention reduces the combined outcome of all-cause  
50  
51 248 hospitalisation (including night- and day-only admissions) and all-cause mortality (primary  
52  
53 249 outcome) or any of its components (secondary outcomes) in patients with polypharmacy,  
54  
55 250 compared to usual care.  
56  
57  
58  
59  
60

- 1  
2  
3 251 2. Evaluate whether the complex intervention reduces cause-specific hospitalisation  
4  
5 252 preceded by high-risk prescribing in patients with polypharmacy, compared to usual care  
6  
7 253 (secondary outcomes).  
8  
9  
10 254 3. Ascertain whether the complex intervention reduces the number of Potentially  
11  
12 255 Inappropriate Medications (PIMs) and Potential Prescribing Omissions (PPOs) as measured  
13  
14 256 using explicit criteria, in patients with polypharmacy, compared to usual care (outcomes of  
15  
16 257 process of care).  
17  
18 258 4. Assess whether the complex intervention reduces the number of prescribed medications  
19  
20 259 in patients with polypharmacy, compared to usual care (outcomes of process of care).  
21  
22  
23 260 5. Evaluate whether the complex intervention is effective in reducing the combined primary  
24  
25 261 outcome, or any of its components, in subgroups of patients defined according to age (<65  
26  
27 262 versus  $\geq 65$  years), sex, early and late enrolment (patient does or does not fulfil the  
28  
29 263 inclusion criteria from the moment he or she joins the intervention of the associated  
30  
31 264 practice), and main treating physician (General Practitioner – GP - vs. specialised physician  
32  
33 265 or hospital outpatient clinics).  
34  
35  
36  
37  
38

## 39 267 **METHODS AND ANALYSIS**

### 40 41 268 **Study design**

42  
43 269 The AdAM trial was originally planned as a pragmatic, parallel cluster-randomised controlled  
44  
45 270 trial (cRCT) with 15 months (five quarters) of follow-up per cluster (practice). The general  
46  
47 271 practice is the unit of randomisation and the patient the unit of analysis. Since general  
48  
49 272 practitioners trained in performing the intervention are unable to provide usual care, a  
50  
51 273 clustered design (practices as clusters) was chosen to reduce treatment group contamination.  
52  
53

### 54 274 **Important changes after trial launch**

55  
56  
57 275 When practice recruitment ended in June 2019, it became obvious that the target numbers of  
58  
59 276 practices and patients would not be achieved. Extensive simulations were therefore conducted  
60



277 on the assumptions that the number of eligible patients was the same (39 per practice) in all  
278 688 randomized practices, that 60% of potential patients had enrolled and that the event rate  
279 in the control group would be constant in all quarters. After completing the simulation we  
280 decided to change the design of the trial in such a way that a power of 80% could still be reached.  
281 The following changes were made and will be explained in detail in each section of the protocol:  
282 i) Primary and secondary outcomes will be measured at regular intervals over 12 quarters, rather  
283 than once after five quarters; ii) The statistical analysis will be adapted to take account of the  
284 new design.

285 All changes were made before data from the study population were analyzed (Figure 1).

286 [About here Figure 1 on AdAM study flow chart]

287

## 288 **Study setting and population**

289 The trial is conducted in general practices in Westphalia-Lippe, Germany.

### 290 *Inclusion criteria for trial sites (general practices)*

291 All criteria had to be fulfilled:

- 292 - General practices provide health services to patients covered by the BARMER statutory  
293 health insurance fund (BARMER).
- 294 - Physicians work as GPs and have specialised in general practice, internal medicine or in no  
295 particular field.
- 296 - Practices have at least 10 eligible patients.
- 297 - Practices have access to the Westphalia-Lippe Association of Statutory Health Insurance  
298 Physicians (KVWL) website through a secure connection (VPN) that can be used by both  
299 general practitioners and other medical staff (practice nurse and health care assistants).
- 300 - Investigators agree to fulfil the contractual obligations arising from the trial.

### 301 *Inclusion criteria for patients*

302 All criteria had to be fulfilled:

- 1  
2  
3 303 - Patients are at least 18 years of age and covered by BARMER.  
4  
5 304 - They have polypharmacy, defined as the regular intake of at least five drugs ( $\geq$  five  
6  
7 305 different Anatomical Therapeutic Chemical - ATC) over at least the two previous quarters.  
8  
9 306 In order to participate in the intervention, patients had to provide written informed consent.  
10  
11 307 They also had to be competent to sign the required documents under law and capable of  
12  
13 308 providing written informed consent to participate in the trial voluntarily. Patients that were  
14  
15 309 not competent to sign the documents under law and were not capable of providing written  
16  
17 310 informed consent to participate in the trial voluntarily (e.g., because of dementia) could  
18  
19 311 provide written informed consent signed by an informal caregiver.  
20  
21  
22

23 312 *No changes were made to setting and study population after trial launch.*  
24  
25  
26  
27

28 313

#### 29 314 **Recruitment and registration**

##### 30 315 *Recruitment and registration of practices*

31  
32 316 The KVWL and the BARMER provided a list of general practices that were eligible to participate  
33  
34 317 in the trial. Of these, the KVWL contacted general practitioners from practices with at least ten  
35  
36 318 eligible patients by postal mail (written invitation). Reminders were later sent by fax. General  
37  
38 319 practitioners that wished to participate had to return a signed investigator's agreement form  
39  
40 320 to the KVWL (either by postal mail or fax).  
41  
42

43 321 Moreover, the trial was announced in journals and local media (press, radio, television), and  
44  
45 322 communicated to local key stakeholders (moderators of quality circles, managers of practice  
46  
47 323 networks, etc.). Local recruitment events were also organised.  
48  
49

50 324

##### 51 325 *Recruitment and registration of patients*

52  
53 326 STEP 1: Before randomisation, the BARMER identified eligible patients from the participating  
54  
55 327 general practices based on claims data.  
56  
57  
58  
59  
60

1  
2  
3 328 STEP 2: After cluster-randomisation of participating practices, patients in the intervention  
4  
5 329 practices were recruited in three ways:  
6  
7 330 - Every quarter, general practitioners received a list of eligible patients, as well as written  
8  
9 331 information and informed consent forms for the patients. The general practitioners could  
10  
11 332 therefore invite eligible patients on their lists to participate.  
12  
13  
14 333 - The BARMER sent written information on the study (information letter and a flyer) to  
15  
16 334 eligible patients from participating intervention practices so that they could actively  
17  
18 335 approach their general practitioners to find out about the study. The aim was to explain  
19  
20 336 the contents of the AdAM project to eligible patients in good time in order to arouse  
21  
22 337 interest and actively assist in enrolment. The BARMER telephone hotline was available to  
23  
24 338 immediately answer any questions the patients had. Additional information on the study  
25  
26 339 was provided on the BARMER website (daily news and FAQ list).  
27  
28  
29 340 - General practitioners invited patients from their practices that fulfilled the inclusion  
30  
31 341 criteria but had not (yet) been identified as eligible from claims data (e.g., due to a delay of  
32  
33 342 data processing).  
34  
35  
36 343 STEP 3: General practitioners sent patients' written informed consent to the KVWL. The KVWL  
37  
38 344 digitised the consent forms and transmitted them to BARMER for verification of insurance  
39  
40 345 status. When the results were positive, KVWL permitted general practitioners to access the  
41  
42 346 electronic medication management support system (eMMa®) and forwarded the original  
43  
44 347 consent forms to the BARMER for archiving.  
45  
46  
47 348 When the follow-up period of the cRCT was over, eligible patients in the control group that  
48  
49 349 were identified in STEP 1 were invited to provide their written informed consent and  
50  
51 350 participate in the intervention. Beginning with STEP 2, the recruitment and registration of  
52  
53 351 control patients followed the same procedure as intervention patients (Figure 1).  
54  
55  
56 352 *No changes were made in recruitment and registration after the trial began.*  
57  
58  
59 353  
60

1  
2  
3 354 **Randomisation and allocation concealment**  
4

5 355 Practices were randomly allocated to the complex intervention or control arm in a ratio of 1:1  
6  
7 356 (Figure 2). Balanced randomisation was performed every month to ensure the treatment  
8  
9 357 groups were of approximately equal size for each quarter. The KVWL provided lists of  
10  
11 358 participating practices to the Institute of Medical Informatics, Biometry and Epidemiology  
12  
13 359 (AMIB) at the Ruhr University Bochum, Germany. A study-independent staff member at the  
14  
15 360 AMIB used computer-generated random numbers to generate randomisation lists from the list  
16  
17 361 of participating practices. Randomisation lists were sent to KVWL, which concealed treatment  
18  
19 362 allocation to participating practices. Once a practice was randomised, all eligible patients at  
20  
21 363 the practice were deemed to be intervention or control patients, depending on the arm of the  
22  
23 364 study the practice was allocated to. The list of eligible patients in the intervention group was  
24  
25 365 made available to participating physicians and the intervention began, after patients had  
26  
27 366 signed the informed consent form. Eligible patients in the control group continued to receive  
28  
29 367 usual care. After signing the informed consent form, eligible patients in the control group were  
30  
31 368 invited to participate in the intervention five quarters after randomisation.  
32  
33  
34  
35

36 369 *No changes were made in randomisation and allocation concealment after the trial began.*  
37  
38

39 370

40  
41 371 [About here Figure 2 on AdAM data availability (time flow)]  
42

43 372

44  
45 373 **Blinding**  
46

47 374 Allocation was disclosed to the practices soon after randomisation, and to patients from  
48  
49 375 intervention practices when they were asked to provide their written informed consent.  
50

51 376 Patients in the control group were not aware of the study until the end of their practice's  
52  
53 377 follow-up period of the cRCT.  
54

55 378 Due to the type of intervention, neither general practitioners and their patients nor the AdAM  
56  
57 379 study team were blinded to the treatment allocation.  
58  
59  
60

1  
2  
3 380 *No changes were made in blinding after trial commencement.*  
4

5 381

6  
7 382 **Treatment plan for intervention and control groups**  
8

9 383 *Intervention group*

10 384 Several key elements of the intervention must be put into place in participating general

11  
12  
13  
14 385 practices:

- 15  
16 386 1. The web-based, user-initiated CDSS eMMA<sup>®</sup> provides the general practitioner with drug-  
17  
18 387 therapy information that is relevant to participating patients with polypharmacy on  
19  
20 388 demand. The information might include data on diagnoses, treatments (also non-  
21  
22 389 pharmacologic, such as physiotherapy) and medical products (e.g., assistive devices). The  
23  
24 390 information is based on claims data gathered from all health care professionals involved in  
25  
26 391 the care of the patient (e.g., specialised ambulatory care physicians, other general  
27  
28 392 practitioners, psychotherapists, as well as data on hospital stays and prescription data  
29  
30 393 from pharmacies). RpDoc<sup>®</sup> Solutions GmbH developed eMMA<sup>®</sup> in collaboration with  
31  
32 394 KVWL.  
33  
34 395 2. General practitioners can add and modify patient data in eMMA<sup>®</sup> (e.g., remove drugs  
35  
36 396 which the patient no longer takes, add new diagnoses, prescriptions and over the counter  
37  
38 397 (OTC) drugs, and recent laboratory findings about kidney function, etc.) in order to  
39  
40 398 enhance and update relevant information.  
41  
42 399 3. Aided by eMMA<sup>®</sup>, general practitioners systematically assess the appropriateness of every  
43  
44 400 patient's medication at least once a year. Alerts will draw the GP's attention to possible  
45  
46 401 drug-drug interactions, drug-disease interactions, age-related PIMs, duplicate medications,  
47  
48 402 renal dose adjustments, allergies, as well as general inappropriateness, such as  
49  
50 403 prescriptions associated with Dear Doctor letters (Rote-Hand-Briefe) and QT prolongation  
51  
52 404 (for a detailed description see Additional file 2).  
53  
54 405 4. General practitioners optimise patient medication.  
55  
56  
57  
58  
59  
60

- 1  
2  
3 406 5. General practitioners print out the updated medication plan, which includes  
4  
5 407 recommendations on medication use, reasons for prescriptions in lay language, and  
6  
7 408 information on drugs that should be avoided, and hand it out to patients. The plan will also  
8  
9 409 be available in foreign languages for patients that speak poor German.  
10  
11  
12 410 6. eMMA<sup>®</sup> provides general practitioners with guidance (e.g., recommendations addressing  
13  
14 411 certain types of medication errors and high-risk prescribing that were developed by the  
15  
16 412 German Society for Internal Medicine in collaboration with other scientific medical  
17  
18 413 societies).

20  
21 414 *Intervention training*

22  
23 415 General practitioners were invited to attend two kick-off meetings and a decentralised event  
24  
25 416 on polypharmacy with a consulting pharmacist from KVWL.

26  
27 417 General practitioners and health care assistants also could attend a decentralised software  
28  
29 418 training event with consulting pharmacists and IT support staff.

30  
31 419 The KVWL has made a training video and a FAQ list for participating practices available on the  
32  
33 420 trial access site.

34  
35 421 During practice hours, several telephone hotlines were offered for technical questions (IT  
36  
37 422 support) and to provide on-site support for questions relating to administration, management  
38  
39 423 and use.

40  
41 424 The TIDieR checklist was used to ensure intervention reporting standards were met.

42  
43 425 (Additional file 3)

44  
45 426 *No changes were made to the experimental treatment after the trial commenced.*

46  
47 427 [About here link to Additional file 2 on RpDoc<sup>®</sup> medical database]

48  
49 428 [About here link to Additional file 3 on the TIDieR]

50  
51 429

52  
53 430 *Control group*

1  
2  
3 431 For the duration of the cRCT, patients in the control group continued to receive usual  
4  
5 432 treatment from their general practitioner. Five quarters after randomisation, control practices  
6  
7 433 could switch to intervention and the patients in these practices had the option to switch to the  
8  
9 434 intervention group on condition that they first provide their written informed consent to  
10  
11  
12 435 receive the intervention.

13  
14 436 *No changes were made concerning the control group, as the switch to the intervention group*  
15  
16 437 *was already planned in order to carry out the sub-study on sustainability (see Additional File 1).*

17  
18  
19 438

20  
21 439 **Outcome assessment**

22  
23 440 *Primary outcome*

24  
25 441 The primary outcome is the combined endpoint of all-cause mortality and all-cause  
26  
27 442 hospitalisation (including night- and day-only admissions) in patients with polypharmacy, as  
28  
29 443 assessed quarterly (Table 1. CPO-1).

30  
31  
32 444 *Secondary outcomes*

- 33  
34 445 1. All-cause hospitalisation (quarterly): To evaluate whether the complex intervention  
35  
36 446 reduces all-cause hospitalisation (including day- or night-only admissions) (number and  
37  
38 447 duration) in patients with polypharmacy (Table 1. SOh-1).
- 39  
40 448 2. All-cause mortality (quarterly): To assess whether the complex intervention reduces all-  
41  
42 449 cause mortality in patients with polypharmacy (Table 1. SOM-1).
- 43  
44 450 3. Incidence rate of cause-specific hospitalisation preceded by high-risk prescribing  
45  
46 451 (quarterly): To evaluate whether the complex intervention reduces cause-specific hospital  
47  
48 452 admissions (gastrointestinal bleeding, heart failure, renal failure, fall-related fractures or  
49  
50 453 injuries; including and excluding day-only admissions) preceded by high-risk prescribing in  
51  
52 454 patients with polypharmacy (Table 1. SOh-2 to SOh-4).

53  
54  
55  
56  
57 455 *Secondary outcomes concerning process of care*  
58  
59  
60

- 1  
2  
3 456 4. Number of PIMs (quarterly): To ascertain whether the complex intervention improves the  
4  
5 457 appropriateness of prescriptions in patients with polypharmacy (Table 1. SOpim-C).  
6  
7 458 5. Total number of underused medications (quarterly): To assess whether the total number  
8  
9 459 of underused medications (based on the modified START criteria) in patients with  
10  
11 460 polypharmacy does not increase in the intervention group in comparison to the control  
12  
13 461 group (Table 1. SOum-1 to SOum-5).  
14  
15  
16 462 6. Total number of prescribed medications (quarterly): To assess whether the complex  
17  
18 463 intervention reduces the total number of prescribed medications in patients with  
19  
20 464 polypharmacy (Table 1. SOp).

21  
22  
23 465 Testing of these outcomes will be exploratory.

24  
25  
26 466 Data for primary and secondary outcomes will be taken from health insurance claims data  
27  
28 467 (BARMER) for the period from the 4<sup>th</sup> quarter 2017 to the 3<sup>rd</sup> quarter 2020.

29  
30  
31 468 *Changes made after trial commencement:* Initially, we planned a one-time survey of outcomes  
32  
33 469 for a period of five quarters following randomisation. In the end, data on the endpoints was  
34  
35 470 collected quarterly for the period from the 4<sup>th</sup> quarter 2017 to the 3<sup>rd</sup> quarter 2020.

36  
37  
38 471 [About here Table 1 on Outcome measures]

39  
40  
41 472

42  
43 473 *Explanatory variables for population characteristics*

44  
45 474 Patient (first level) variables

46  
47 475 - Sociodemographic patient data. Sex, age, insurance status and reason insurance coverage  
48  
49 476 ended (death, change of sickness fund).

50  
51 477 - Outpatient diagnoses and outpatient services. The International Classification of Diseases  
52  
53 478 10<sup>th</sup> edition (ICD 10) codes (27) are used for the outpatient diagnoses, which are  
54  
55 479 documented on a quarterly basis. The services are coded according to the Physician's Fee  
56  
57 480 Scale (Einheitlicher Bewertungsmaßstab = EBM).  
58  
59  
60



- 1  
2  
3 481 - Medication. Drugs are identified using their national drug code (pharmaceutical  
4  
5 482 registration number, Pharma-Zentral-Nummer - PZN), which contains all relevant  
6  
7 483 information such as trade name, active chemical ingredient(s), strength, application,  
8  
9 484 dosage and indication. The PZN will be linked to the ATC Classification System, which  
10  
11 485 allows analysis to be based on active ingredients, manufacturer and package size. The  
12  
13 486 duration of the therapy will be assessed by means of the defined daily dose (DDD Index)  
14  
15 487 and included in the reference table. The dataset only includes prescribed medication that  
16  
17 488 is paid for by the insurance fund.  
18  
19  
20  
21 489 - Inpatient data. For each hospitalisation the start and end date, the admission and  
22  
23 490 discharge diagnosis (with date), as well as secondary diagnoses, will be available.  
24  
25 491 Furthermore, operations and treatment procedures are also documented (Operation and  
26  
27 492 Procedure - OPS - Code).  
28  
29  
30 493 - Long-term nursing care (Sozialgesetzbuch - SGB XI). For patients receiving long-term  
31  
32 494 nursing care, the start and end date, the level and place of care, the costs and type of  
33  
34 495 services (cash, non-cash, combined) are documented in the dataset.  
35  
36 496 Practice profile (second level) variables  
37  
38  
39 497 - Single-handed practice / group practice (including ambulatory health care centres, along  
40  
41 498 with the number of physicians).  
42  
43 499 - Work experience (start and end date of practice according to KVWL data).  
44  
45 500 - Practice size: Number of registered patients in most recent quarter.  
46  
47 501 - Participation in a (regional) practice network.  
48  
49  
50 502 General practitioner profile (second level) variables  
51  
52 503 - Age, gender.  
53  
54 504 *No changes were made to explanatory variables.*  
55  
56 505  
57  
58 506 **Safety monitoring and adverse events**  
59  
60

1  
2  
3 507 Safety and adverse events were not monitored and reported upon, since it was assumed that  
4  
5 508 treatment could not deteriorate as a result of the trial. The study team had no influence on the  
6  
7 509 diagnostic-therapeutic decision-making of general practitioners and their patients, and analysis  
8  
9 510 of the pseudonymous data will be conducted with a significant delay. General practitioners  
10  
11 511 and patients could therefore not be informed of identified medication errors.  
12  
13 512 Unintended consequences of using the e-Health technology such as non-acceptance will be  
14  
15 513 investigated qualitatively (Additional file 1).  
16  
17  
18  
19  
20

## 21 515 **Data collection and management**

### 22 516 *Data collection*

23 517 Information on all eligible patients was taken pseudonymously from BARMER's claims data.  
24  
25 518 Claims data detail billable interactions (insurer claims) between the insured patients and the  
26  
27 519 health care delivery system.  
28  
29 520 In the trial, the KVWL data is not systematically linked to BARMER's data on either a  
30  
31 521 practitioner or patient level. The KVWL provides sociodemographic data on general  
32  
33 522 practitioners and practice profiles for both the intervention and control groups.  
34  
35  
36  
37  
38  
39  
40

### 41 524 *Data management*

42 525 The required claims data for all eligible patients in the region covered by the KVWL will be  
43  
44 526 specified in a coordinated Minimum Data Set (MDS) and prepared by the PMV research group  
45  
46 527 in Cologne.

47 528 The trial data will be archived for 10 years. BARMER will archive a back-up copy containing the  
48  
49 529 data of all study patients (list of eligible patients, declarations of consent to participate in the  
50  
51 530 trial and on data protection, signed and dated by the patients, as well as the data provided for  
52  
53 531 the evaluation) in accordance with European basic data protection regulations. The KVWL will  
54  
55 532 archive documents concerning the general practices / general practitioners participating in the  
56  
57  
58  
59  
60

1  
2  
3 533 trial (e.g., signed investigator's agreement form). The IGP will archive the trial master file and  
4  
5 534 any related study plans (MDS and statistical analysis plan). The data provided by KVWL and  
6  
7 535 eMMA<sup>®</sup>, as well as primary data collected in interviews with patients, will be archived by the  
8  
9 536 IGP in accordance with European basic data protection regulations.  
10  
11

12 537

13  
14 538 *End of the trial*

15  
16 539 The regular end of the intervention was October 2020, to which a follow-up period of up to 12  
17  
18 540 quarters will be added.

19  
20 541 A patient's participation in the intervention ends prematurely: i) when he or she switches to  
21  
22 542 another insurance company and/or a non-participating practice, or ii) the general practitioner  
23  
24 543 withdraws his or her consent or is no longer licensed to provide health services by the KVWL.  
25  
26

27 544

28  
29 545 *Schedule and duration of the trial*

30  
31 546 Practice recruitment: 02.05.2017 to 30.06.2019.

32  
33 547 Intervention period: 15.02.2018 to 30.09.2020.

34  
35 548 Claims data from 01.10.2017 to 30.09.2020 will be used in the analysis. The cohort is open,  
36  
37 549 meaning that patient data are included from the quarter in which the inclusion criteria are  
38  
39 550 met.  
40  
41

42 551

43  
44 552 *Quality control and quality assurance*

45  
46 553 The principal investigator and a steering committee (comprising representatives of BARMER,

47  
48 554 KVWL and the evaluation team) guarantee that all processes in the trial comply with Good

49  
50 555 Clinical Practice (GCP) guidelines and ethical and legal requirements.

51  
52 556 BARMER and the KVWL are responsible for monitoring the trial and were in particular

53  
54 557 responsible for the recruitment of practices and patients, randomisation (supported by the  
55  
56  
57  
58  
59  
60

1  
2  
3 558 AMIB), the implementation of the intervention, and the provision of data to the evaluation  
4  
5 559 team.

6  
7 560 A designated advisory board provides advice on questions concerning planning, conducting  
8  
9 561 and analysing the trial.

10  
11 562 *Changes to data collection and data management:* Initially, data collection for each practice  
12  
13 563 was to be carried out as a one-time survey to take place after the start of randomisation and  
14  
15 564 over a period of five quarters. In the end, data was collected at regular intervals over 12  
16  
17 565 quarters from the 4th quarter 2017 to the 3rd quarter 2020 (light blue and light red areas in  
18  
19 566 Figure 2).

20  
21  
22  
23 567

#### 24 25 568 **Sample size**

26  
27 569 Initially, based on data detailing the incidence of hospitalisation and all-cause mortality in  
28  
29 570 patients with multiple prescriptions, we expected rates of 30% in the control group over a 12-  
30  
31 571 month follow-up period (16,17). Based on a duration of 15 months (five quarters), the rates  
32  
33 572 were assumed to be 35.25% in the control group, with a relative reduction of 5% in the  
34  
35 573 intervention group. Based on 80% recruitment of practices and patients and an intra-cluster  
36  
37 574 correlation coefficient (ICC) of 1%, a sample size of 17,200 cluster-randomised patients per  
38  
39 575 group (539 practices per study arm, about 32 patients per practice) is required to detect an  
40  
41 576 absolute difference in the combined endpoint of 1.8% between intervention and control  
42  
43 577 groups (type 1 error of 5% and type 2 error of 15%).

44  
45  
46  
47 578 *Changes made after trial launch:* At the end of practice recruitment in June 2019, it became  
48  
49 579 clear that the target numbers of practices could not be achieved. In the period from 27.06.2017  
50  
51 580 to 03.07.2019, 688 practices were randomised to the intervention and control groups. Based on  
52  
53 581 the assumptions of 26,832 (688\*39) eligible patients in the randomised practices, a participation  
54  
55 582 rate of 60% of patients in the intervention group, the same number of practices at all changeover  
56  
57  
58  
59  
60

1  
2  
3 583 times (i.e., the switch from control to intervention group), and a constant event rate in the  
4  
5 584 control group over all quarters, a power of 80% is achievable.

6  
7 585

8  
9  
10 586 **Statistical analysis**

11  
12 587 *Population for analysis*

13  
14 588 As both patients that met the inclusion and exclusion criteria from the beginning, and patients  
15  
16 589 that fulfilled the inclusion and exclusion criteria after the trial had commenced were able to  
17  
18 590 receive the intervention, the ITT population was an open cohort. Patients from participating  
19  
20 591 practices therefore started from the time at which inclusion and exclusion criteria were met  
21  
22  
23 592 during a period stretching from the 4<sup>th</sup> quarter 2017 to the end of the 3<sup>rd</sup> quarter 2020.

24  
25 593 Following the ITT principle, practices and their patients will be analysed quarterly, according to  
26  
27 594 the group to which the practice was allocated, regardless of whether they refused or  
28  
29 595 discontinued the allocated treatment, or whether there were other deviations from the  
30  
31 596 protocol.

32  
33  
34 597 For the efficacy analysis, only patients that were selected from the intervention group and for  
35  
36 598 whom the general practitioner had performed the intervention will be considered. This  
37  
38 599 subgroup will be compared with patients in the control group that started the intervention after  
39  
40 600 completion of the cRCT-phase. In this population, it will be possible to estimate the maximum  
41  
42 601 possible effect of the intervention, comparable to a per-protocol (PP)-population.

43  
44  
45  
46 602 No changes were made to the population for analysis.

47  
48  
49 603 *Statistical hypotheses, methods, and analyses*

50  
51 604 The primary objective of this study is to determine whether the complex intervention reduces  
52  
53 605 the combined endpoint of all-cause mortality and all-cause hospitalisation (including night-  
54  
55 606 and day-only admissions) in adult patients with polypharmacy, as compared to usual care.

56  
57 607 Statistically, the study objective is formulated as a test of the null hypothesis  $H_0: p_1 = p_2$  (the  
58  
59 608 two groups do not differ in terms of the quarterly event probability of combined endpoint  $p_i$ ,

1  
2  
3 609 where  $i=1$  or  $2$  for intervention or control group respectively), compared to the alternative  
4  
5 610 hypothesis  $H1: p_1 \neq p_2$  (there is a difference between the two groups).  
6  
7 611 The analysis is based on quarterly data at a patient level and patients are clustered in  
8  
9 612 practices. We will adjust for the different observation periods and for clustering in the data by  
10  
11 613 fitting an appropriate generalised linear mixed model (GLMM). A mixed logistic regression  
12  
13 614 model will therefore be used for all binary outcomes, and especially for the primary endpoint.  
14  
15 615 Time and treatment group, and further confounders such as age, sex, the medCDS prognostic  
16  
17 616 index (28), care level/degree at baseline, days in hospital in the 12 months preceding baseline,  
18  
19 617 are considered to be fixed factors. Since all practices were observed under both control and  
20  
21 618 intervention conditions, it will be necessary to include two correlated random cluster level  
22  
23 619 effects in the model. To gauge the interdependence of individual measurements over the  
24  
25 620 course of the study, additional uncorrelated random effects for patients will also be fitted.  
26  
27 621 In the AdAM trial, we have assumed that the intervention requires an initial period of  
28  
29 622 adjustment before becoming fully embedded. The intervention effect is therefore expected to  
30  
31 623 gradually increase from the time the practice switches to the intervention ( $\frac{1}{4}$  in the quarter of  
32  
33 624 the practice change,  $\frac{1}{2}$  in the quarter after the change to intervention and the full effect  
34  
35 625 thereafter).  
36  
37 626 A similar approach will be used to investigate secondary outcomes, sensitivity and efficacy.  
38  
39 627 The secondary outcomes 2 (all-cause hospitalisation) and 3 (all-cause mortality) are to be  
40  
41 628 analysed hierarchically, reflecting the rationale of the intervention, with a significant decrease  
42  
43 629 in the combined primary endpoint of all-cause mortality and all-cause hospital admissions  
44  
45 630 (level 1) expected to reflect primarily in a decline in all-cause hospitalisation (level 2). If so, all-  
46  
47 631 cause mortality may also decrease (level 3). Therefore, the pre-specified secondary outcomes  
48  
49 632 2 and 3 will be tested in a confirmatory manner. If no significant differences occur at any level,  
50  
51 633 tests of outcomes on higher levels will be exploratory.  
52  
53  
54  
55  
56  
57  
58  
59  
60

1  
2  
3 634 The baseline characteristics of participating practices, general practitioners and patients will be  
4  
5 635 described according to the initially allocated treatment arm. Categorical data will be presented  
6  
7 636 as frequencies and percentages. Total numbers, mean, standard deviation, median, inter-  
8  
9 637 quartile range (IQR), minimum, and maximum will be provided for continuous data.

11 638 All statistical tests will be two-sided at a significance level of  $\alpha=0.05$ . No interim analysis of  
13  
14 639 efficacy will be performed.

16 640 *Changes made after trial launch:* We initially planned to use a generalised linear mixed model  
17  
18 641 to evaluate the treatment effect in a randomised parallel group design. In addition to  
19  
20 642 considering the treatment group to be a fixed factor, a random effect to account for clustering  
21  
22 643 patients in practices is necessary. Due to the switch to a stepped wedge design, a more  
23  
24 644 complex model structure was required (see above).

27 645

#### 30 646 **Patient and public involvement**

31  
32 647 This protocol was developed without patient or public involvement.

34 648

#### 36 649 **ETHICS AND DISSEMINATION**

38  
39 650 The project is being carried out in accordance with the Medical Association's code of conduct  
40  
41 651 and GCP, and in line with the World Medical Association Declaration of Helsinki (29). The study  
42  
43 652 plans and all patient-related documents have been sent to and approved by the Ethics  
44  
45 653 Commission of the North-Rhine Medical Association (approval date 26.07.2017, approval no.  
46  
47 654 2017184).

49  
50 655 All changes made and reported here after the trial began have also been sent to and approved  
51  
52 656 by the above-mentioned ethics committee (approval date 03.04.2020, approval no.  
53  
54 657 6000207769).

1  
2  
3 658 The voluntary participation of practitioners in the trial is recorded in writing following their  
4  
5 659 informed decision. Patients were asked for their consent as soon as the practice switched to  
6  
7 660 the intervention. Patients that did not wish to participate continued to receive usual care.  
8  
9 661 Data protection is guaranteed for all patient-related data. Eligible patients were identified  
10  
11 662 using pseudonymous claims data from BARMER, whereby BARMER previously informed the  
12  
13 663 patient of the opportunity to participate in the trial. Before the intervention began, patients  
14  
15 664 were separately informed about data protection during the trial and intervention. Patients had  
16  
17 665 to provide their informed consent by signing and dating a declaration.  
18  
19 666 This study protocol was prepared in accordance with the extension of the CONSORT 2010  
20  
21 667 statement for reporting on cluster randomised trials (Additional file 4) (30).  
22  
23 668 [About here link to Additional file 4 on CONSORT 2010 checklist of information to include when  
24  
25 669 reporting on a cluster randomised trial]  
26  
27 670 We will prepare presentations to disseminate the study findings to healthcare stakeholders  
28  
29 671 and patients, and at relevant national and international conferences. We aim to publish the  
30  
31 672 results of the trial in peer-reviewed journals.  
32  
33  
34  
35

36 673

37  
38  
39 674 **REFERENCES**

- 40  
41 675 1. Ferner RE, Aronson JK. Communicating information about drug safety. *BMJ*. 2006 Jul  
42  
43 676 15;333(7559):143–5.  
44  
45 677 2. Weng M-C, Tsai C-F, Sheu K-L, Lee Y-T, Lee H-C, Tzeng S-L, et al. The impact of number  
46  
47 678 of drugs prescribed on the risk of potentially inappropriate medication among  
48  
49 679 outpatient older adults with chronic diseases. *QJM An Int J Med*. 2013 Nov  
50  
51 680 1;106(11):1009–15.  
52  
53 681 3. Campbell SE, Seymour DG, Primrose WR, Lynch JE, Dunstan E, Espallargues M, et al. A  
54  
55 682 multi-centre European study of factors affecting the discharge destination of older  
56  
57 683 people admitted to hospital: analysis of in-hospital data from the ACMEplus project.  
58  
59  
60



- 1  
2  
3 684 Age Ageing. 2005 Sep 1;34(5):467–75.  
4  
5  
6 685 4. Hanlon JT, Schmader KE, Ruby CM, Weinberger M. Suboptimal Prescribing in Older  
7  
8 686 Inpatients and Outpatients. *J Am Geriatr Soc*. 2001 Feb;49(2):200–9.  
9  
10  
11 687 5. Thomsen LA, Winterstein AG, Søndergaard B, Haugbølle LS, Melander A. Systematic  
12  
13 688 review of the incidence and characteristics of preventable adverse drug events in  
14  
15 689 ambulatory care. *Ann Pharmacother*. 2007;41(9):1411–26.  
16  
17  
18 690 6. Rodrigues MCS, Oliveira C de. Drug-drug interactions and adverse drug reactions in  
19  
20 691 polypharmacy among older adults: an integrative review. *Rev Lat Am Enfermagem*.  
21  
22 692 2016;24.  
23  
24  
25 693 7. Edwards IR, Aronson JK. Adverse drug reactions: definitions, diagnosis, and  
26  
27 694 management. *Lancet*. 2000 Oct;356(9237):1255–9.  
28  
29  
30 695 8. Field TS, Gurwitz JH, Avorn J, McCormick D, Jain S, Eckler M, et al. Risk Factors for  
31  
32 696 Adverse Drug Events Among Nursing Home Residents. *Arch Intern Med*. 2001 Jul  
33  
34 697 9;161(13):1629.  
35  
36  
37 698 9. Lu W-H, Wen Y-W, Chen L-K, Hsiao F-Y. Effect of polypharmacy, potentially  
38  
39 699 inappropriate medications and anticholinergic burden on clinical outcomes: a  
40  
41 700 retrospective cohort study. *Can Med Assoc J*. 2015 Mar 3;187(4):E130–7.  
42  
43  
44 701 10. Frazier SC. Health Outcomes and Polypharmacy in Elderly Individuals. *J Gerontol Nurs*.  
45  
46 702 2005 Sep 1;31(9):4–9.  
47  
48  
49 703 11. Franchi C, Marcucci M, Mannucci PM, Tettamanti M, Pasina L, Fortino I, et al. Changes  
50  
51 704 in clinical outcomes for community-dwelling older people exposed to incident chronic  
52  
53 705 polypharmacy: a comparison between 2001 and 2009. *Pharmacoepidemiol Drug Saf*.  
54  
55 706 2016 Feb;25(2):204–11.  
56  
57  
58 707 12. Lai S-W, Liao K-F, Liao C-C, Muo C-H, Liu C-S, Sung F-C. Polypharmacy Correlates With  
59  
60

- 1  
2  
3 708 Increased Risk for Hip Fracture in the Elderly. *Medicine (Baltimore)*. 2010  
4  
5 709 Sep;89(5):295–9.  
6  
7  
8 710 13. Sganga F, Landi F, Ruggiero C, Corsonello A, Vetrano DL, Lattanzio F, et al.  
9  
10 711 Polypharmacy and health outcomes among older adults discharged from hospital:  
11  
12 712 Results from the CRIME study. *Geriatr Gerontol Int*. 2015 Feb;15(2):141–6.  
13  
14  
15 713 14. Crooks J. Rational therapeutics in the elderly. *J Chronic Dis*. 1983 Jan;36(1):59–65.  
16  
17  
18 714 15. Vestal RE. Drug Use in the Elderly. *Drugs*. 1978 Oct;16(4):358–82.  
19  
20  
21 715 16. Vestal RE. Aging and pharmacology. *Cancer*. 1997 Oct 1;80(7):1302–10.  
22  
23  
24 716 17. Koper D, Kamenski G, Flamm M, Böhmendorfer B, Sönnichsen A. Frequency of  
25  
26 717 medication errors in primary care patients with polypharmacy. *Fam Pract*.  
27  
28 718 2013;30(3):313–9.  
29  
30  
31 719 18. Panesar SS, DeSilva D, Carson-Stevens A, Cresswell KM, Salvilla SA, Slight SP, et al. How  
32  
33 720 safe is primary care? A systematic review. *BMJ Qual Saf*. 2016 Jul;25(7):544–53.  
34  
35  
36 721 19. Slabaugh SL, Maio V, Templin M, Abouzaid S. Prevalence and Risk of Polypharmacy  
37  
38 722 among the Elderly in an Outpatient Setting. *Drugs Aging*. 2010 Dec;27(12):1019–28.  
39  
40  
41 723 20. Meid AD, Quinzler R, Freigofas J, Saum K, Schöttker B, Holleczeck B, et al. Medication  
42  
43 724 Underuse in Aging Outpatients with Cardiovascular Disease: Prevalence, Determinants,  
44  
45 725 and Outcomes in a Prospective Cohort Study. Reddy H, editor. *PLoS One*. 2015 Aug  
46  
47 726 19;10(8):e0136339.  
48  
49  
50 727 21. Rankin A, Cadogan CA, Patterson SM, Kerse N, Cardwell CR, Bradley MC, et al.  
51  
52 728 Interventions to improve the appropriate use of polypharmacy for older people.  
53  
54 729 *Cochrane Database Syst Rev*. 2018 Sep 3;9.  
55  
56  
57 730 22. Christie J. Interventions to improve the appropriate use of polypharmacy for older  
58  
59 731 people: A Cochrane review summary. *Int J Nurs Stud*. 2019 May;93:84–6.  
60

- 1  
2  
3 732 23. Muth C, Blom JW, Smith SM, Johnell K, Gonzalez-Gonzalez AI, Nguyen TS, et al.  
4  
5 733 Evidence supporting the best clinical management of patients with multimorbidity and  
6  
7 734 polypharmacy: a systematic guideline review and expert consensus. *J Intern Med*.  
8  
9 735 2019;283(3):272–88.  
11  
12 736 24. Bates DW, Kuperman GJ, Wang S, Gandhi T, Kittler A, Volk L, et al. Ten Commandments  
13  
14 737 for Effective Clinical Decision Support: Making the Practice of Evidence-based Medicine  
15  
16 738 a Reality. *J Am Med Informatics Assoc*. 2003 Nov;10(6):523–30.  
18  
19 739 25. Monteiro L, Maricoto T, Solha I, Ribeiro-Vaz I, Martins C, Monteiro-Soares M. Reducing  
20  
21 740 Potentially Inappropriate Prescriptions for Older Patients Using Computerized Decision  
22  
23 741 Support Tools: Systematic Review. *J Med Internet Res*. 2019 Nov 14;21(11):e15385.  
24  
25  
26 742 26. O’Mahony D, O’Sullivan D, Byrne S, O’Connor MN, Ryan C, Gallagher P. STOPP/START  
27  
28 743 criteria for potentially inappropriate prescribing in older people: Version 2. *Age Ageing*.  
29  
30 744 2015;44(2):213–8.  
31  
32  
33 745 27. World Health Organization (WHO). ICD-10 Transition. [Internet]. Vol. 18, Family practice  
34  
35 746 management. 2011. Available from: <http://www.ncbi.nlm.nih.gov/pubmed/22184833>  
36  
37  
38 747 28. Quinzler R, Freitag MH, Wiese B, Beyer M, Brenner H, Dahlhaus A, et al. A novel  
39  
40 748 superior medication-based chronic disease score predicted all-cause mortality in  
41  
42 749 independent geriatric cohorts. *J Clin Epidemiol*. 2019 Jan;105:112–24.  
43  
44  
45 750 29. World Medical Association. World Medical Association Declaration of Helsinki. *JAMA*.  
46  
47 751 2013 Nov 27;310(20):2191.  
48  
49  
50 752 30. Campbell MK, Piaggio G, Elbourne DR, Altman DG. Consort 2010 statement: extension  
51  
52 753 to cluster randomised trials. *Bmj* [Internet]. 2012;345(sep04 1):e5661–e5661. Available  
53  
54 754 from: <http://www.bmj.com/cgi/doi/10.1136/bmj.e5661>  
55  
56  
57 755 31. Dreischulte T, Donnan P, Grant A, Hapca A, McCowan C, Guthrie B. Safer prescribing —  
58  
59 756 a trial of education, informatics, and financial incentives. *N Engl J Med*.

- 1  
2  
3 757 2016;374(11):1053–64.  
4  
5  
6 758 32. Muth C, Harder S, Uhlmann L, Rochon J, Fullerton B, Güthlin C, et al. Pilot study to test  
7  
8 759 the feasibility of a trial design and complex intervention on PRIoritising  
9  
10 760 MUltimedication in Multimorbidity in general practices (PRIMUM pilot). BMJ Open.  
11  
12 761 2016 Jul 25;6(7):e011613.  
13  
14  
15 762 33. Bergert F, Braun M, Ehrenthal K, Fessler J, Gross J, Hüttner U, et al. Hausärztliche  
16  
17 763 Leitlinie Multimedikation Empfehlungen zum Umgang mit. 2016.  
18  
19  
20 764 34. Muth C, Kirchner H, van den Akker M, Scherer M, Glasziou PP. Current guidelines poorly  
21  
22 765 address multimorbidity: pilot of the interaction matrix method. J Clin Epidemiol. 2014  
23  
24 766 Nov;67(11):1242–50.  
25  
26  
27 767 35. Muth C, Gensichen J, Butzlaff M. DEGAM Leitlinie. Nr. 9: Herzinsuffizienz. Düsseldorf:  
28  
29 768 Omikron Publishing; 2006.  
30  
31  
32 769 36. Renom-Guiteras A, Meyer G, Thürmann P a. The EU(7)-PIM list: a list of potentially  
33  
34 770 inappropriate medications for older people consented by experts from seven European  
35  
36 771 countries. Eur J Clin Pharmacol. 2015;71(7):861–75.  
37  
38  
39 772 37. crediblemeds. Combined list of drugs that prolong QT and/or cause torsades de pointes  
40  
41 773 (TDP) [Internet]. 2014. Available from: <https://www.crediblemeds.org/>  
42  
43  
44  
45  
46  
47  
48  
49  
50  
51  
52  
53  
54  
55  
56  
57  
58  
59  
60

## CONTRIBUTORS

AIGG drafted the first version of the manuscript with input from BSM and CM. Critical revision of manuscript for important intellectual content: RKM, NT and HJT. CM, HJT, FMG, DG, WG, SH, RP, PG, HP, UK, PKM, FM and PI are responsible for study concept and design. PKM is the study director. Acquisition of data: BSM, BF, RH, PKM, TB, LD, TSD, SG, JKN, AP, UK, SS. Analysis and interpretation of data will be performed by RKM, JKN, HJT, BS, PI, SS, UK, AP, WG, CM, NT, IM. PI is responsible for strategic data management. CM and NT are the chief investigators of the study. All authors reviewed the paper and read and approved the final manuscript.

## ACKNOWLEDGMENTS

We would like to thank all practice teams and patients for their participation in the study and we also Sandra Rauck and Kiran Chapidi for their contributions as data managers. We appreciate the project management support from BARMER and KVWL. We also thank Phillip Elliott for the language review of the paper.

AdAM study group: Julia Jachmich, Dipl.-Pharm., Consulting Pharmacist (KVWL, Dortmund, Germany), Eva Leicher, Dipl.-Pharm., Consulting Pharmacist (KVWL, Dortmund, Germany), Benjamin Brandt, Project Administration (KVWL, Dortmund, Germany), Johanna Richard, PTA, Prescription Advice (KVWL, Dortmund, Germany), Frank Meyer, Dipl.-Pharm., MPH, Head of Department Corporate Development (KVWL, Dortmund, Germany), Dr. Mathias Flume, Dipl.-Pharm., MBA, Head of Division Member Service (KVWL, Dortmund, Germany), Thomas Müller, Dipl.-Ök. Member of Executive Board (KVWL, Dortmund, Germany), Kiran Chapidi, MBA (Institute of General Practice, Goethe-University, Frankfurt/Main, Germany), Robin Brünn (Institute of General Practice, Goethe-University, Frankfurt/Main, Germany) (bruenn@allgemeinmedizin.uni-frankfurt.de), Jale Basten, M.Sc. (Department of Medical Informatics, Biometry and Epidemiology, Ruhr University, Bochum, Germany), Karolina Beifuß, Dipl.-Ök. (Center for Health Economics and Health Services Research, University of Wuppertal, Germany).

**FUNDING**

This study was funded by the Innovation Fund of the German Federal Joint Committee (grant no 01NVF16006).

**DISCLAIMER**

The funder had no role in the design of the study, or in writing the manuscript.

**ETHICS APPROVAL**

This study was approved by the Ethics Commission of the North-Rhine Medical Association in July 2017 (approval number: 2017184).

**COMPETING INTERESTS**

BSM, RKM, AIGG, RH, JKN, PKM, NT, TB, LD, BS, BF, PI, SS, TSD, AP, IM, UK, HP, WG, FMG, HJT, CM report grants from the German Federal Joint Committee during the conduct of the study. DG reports grants from BARMER during the conduct of the study and family member works for and holds shares of IT company involved in the project. SG works for and holds shares of IT company involved in the project. SH, RP, PPG declare that they have no competing interests.

**DATA SHARING**

No additional data available.

**PATIENT AND PUBLIC INVOLVEMENT**

Not required.

**WORD COUNT**

4,993

**Table 1. Outcome measures**

**Primary outcome measure - Composite primary outcome (CPO) – All-cause mortality and all-cause hospitalisation**

| No.   | Outcome                                                                             |
|-------|-------------------------------------------------------------------------------------|
| CPO-1 | All-cause mortality and all-cause hospitalisation (including emergency admissions). |

**Secondary outcome measures – PIM-related high-risk prescribing (SOpim)**

| No.                      | Outcomes                                                                                                                                                                                                 |
|--------------------------|----------------------------------------------------------------------------------------------------------------------------------------------------------------------------------------------------------|
| High-risk of GI bleeding |                                                                                                                                                                                                          |
| SOpim-<br>1              | Patients with a peptic ulcer, GERD, Crohn's disease or gastritis who were prescribed a traditional oral NSAID* without a gastroprotective drug in the previous 12 weeks (31,32).                         |
| SOpim -<br>2             | Patients aged 65 or over who were prescribed a traditional oral NSAID* without a gastroprotective drug in the previous 12 weeks (31).                                                                    |
| SOpim -<br>3             | Patients prescribed a platelet aggregation inhibitor excluding heparin and a traditional oral NSAID* without a gastroprotective drug in the previous 12 weeks (31,32).                                   |
| SOpim -<br>4             | Patients prescribed a fixed combination of aspirin and clopidogrel or aspirin and either clopidogrel, ticagrelor or prasugrel without a gastroprotective drug in the previous 12 weeks (31).             |
| SOpim -<br>5             | Patients prescribed an oral anticoagulant or a direct thrombin inhibitor or a direct factor Xa inhibitor and a traditional oral NSAID* without a gastroprotective drug in the previous 12 weeks (31,32). |

|                                           |                                      |                                                                                                                                                                                             |
|-------------------------------------------|--------------------------------------|---------------------------------------------------------------------------------------------------------------------------------------------------------------------------------------------|
| 1<br>2<br>3<br>4<br>5<br>6<br>7<br>8<br>9 | SOpim -<br>6                         | Patients prescribed an oral anticoagulant and a platelet aggregation inhibitor excluding heparin without a gastroprotective drug in the previous 12 weeks (31,32).                          |
| 10<br>11<br>12<br>13                      | SOpim -<br>7                         | Patients prescribed SSRI or SSNRI with a traditional oral NSAID* without a gastroprotective drug in the previous 12 weeks (33,34).                                                          |
| 14<br>15<br>16<br>17<br>18                | SOpim -<br>8                         | Patients prescribed a systemic glucocorticoid with a traditional oral NSAID* without a gastroprotective drug in the previous 12 weeks (33).                                                 |
| 19                                        | High-risk cardiovascular prescribing |                                                                                                                                                                                             |
| 20<br>21<br>22<br>23<br>24<br>25          | SOpim -<br>9                         | Patients prescribed an ACE inhibitor/ARB/renin inhibitor with an oral NSAID* in the previous 12 weeks (31,32).                                                                              |
| 26<br>27<br>28<br>29                      | SOpim -<br>10                        | Patients prescribed a diuretic with an oral NSAID* in the previous 12 weeks (31,32).                                                                                                        |
| 30<br>31<br>32<br>33<br>34                | SOpim -<br>11                        | Heart failure patients prescribed any oral NSAID* in the previous 12 weeks (31,32).                                                                                                         |
| 35<br>36<br>37<br>38                      | SOpim -<br>12                        | Heart failure patients prescribed a tricycle antidepressant in the previous 12 weeks (33,35).                                                                                               |
| 39<br>40<br>41<br>42<br>43<br>44<br>45    | SOpim -<br>13                        | Patients prescribed an ACE inhibitor/ARB/renin inhibitor or a potassium-sparing diuretic including aldosterone antagonists with a potassium supplement in the previous 12 weeks (32,33,35). |
| 46<br>47<br>48<br>49                      | SOpim -<br>14                        | Heart failure patients prescribed a beta-blocking agent, non-selective in the previous 12 weeks (35).                                                                                       |
| 50<br>51<br>52<br>53<br>54                | SOpim -<br>15                        | Patients aged 65 or over prescribed a QTc prolongation drug in the previous 12 weeks (36,37).                                                                                               |
| 55<br>56<br>57<br>58<br>59<br>60          | SOpim -<br>16                        | Patients prescribed two or more QTc prolongation drugs or a QTc prolongation drug with an inhibitor of its isozyme (CYP3A4, CYP2D6) or with known risk factors                              |



|                                                      |                                                                                                                                                                                                                                                                                                                          |                                       |
|------------------------------------------------------|--------------------------------------------------------------------------------------------------------------------------------------------------------------------------------------------------------------------------------------------------------------------------------------------------------------------------|---------------------------------------|
|                                                      | (heart failure, bradycardia, sick sinus syndrome including tachycardia-bradycardia syndrome, other cardiac arrhythmias including long-QT syndrome) (36,37).                                                                                                                                                              |                                       |
| SOpim -<br>17                                        | Patients prescribed digitalis glycosides with a non-potassium-sparing diuretic and no potassium supplement in the previous 12 weeks (32).                                                                                                                                                                                |                                       |
| High-risk prescribing with regards to falls          |                                                                                                                                                                                                                                                                                                                          |                                       |
| SOpim -<br>18                                        | In the previous 12 weeks, patients aged 65 or over prescribed a drug that increases risk of falling (36).                                                                                                                                                                                                                |                                       |
| SOpim -<br>19a/b                                     | In the previous 12 weeks, patients with Parkinson's disease or other degenerative diseases of basal ganglia prescribed a drug that increases risk of falling (36).                                                                                                                                                       |                                       |
| High-risk prescribing composite                      |                                                                                                                                                                                                                                                                                                                          |                                       |
| SOpim -<br>20                                        | Patients with any risk factor and one or more high-risk prescriptions as defined in SOpim measures 1 to 8.                                                                                                                                                                                                               | GI risk composite                     |
| SOpim -<br>21                                        | Patients with any risk factor and one or more high-risk prescriptions as defined in SOpim measures 9 to 17.                                                                                                                                                                                                              | CR risk composite                     |
| SOpim -<br>22                                        | Patients with any risk factor and one or more high-risk prescriptions as defined in SOpim measures 18 to 19.                                                                                                                                                                                                             | Fall risk composite                   |
| SOpim<br>-C                                          | Patients with any risk factor and one or more high-risk prescriptions as defined in SOpim measures 20 to 22.                                                                                                                                                                                                             | High-risk prescription                |
| Initiation and discontinuation prescription measures |                                                                                                                                                                                                                                                                                                                          |                                       |
| SOpim<br>-Ci                                         | Patients who were not exposed to high-risk prescriptions (as defined in SOpim-C measures) in the 12 weeks previous to the intervention (as defined by date of the intervention invoice) and who received a high-risk prescription (as defined in SOpim-C measures) within 12 weeks of the beginning of the intervention. | Initiation of high-risk prescriptions |

|              |                                                                                                                                                                                                                                                                                         |                                            |
|--------------|-----------------------------------------------------------------------------------------------------------------------------------------------------------------------------------------------------------------------------------------------------------------------------------------|--------------------------------------------|
| SOpim<br>-Cd | Patients who were exposed to a high-risk prescription (as defined in SOpim-C measure) in the 12 weeks previous to the intervention (as defined by date of the intervention invoice) that did not receive a high-risk prescription within 12 weeks of the beginning of the intervention. | Discontinuation of high-risk prescriptions |
|--------------|-----------------------------------------------------------------------------------------------------------------------------------------------------------------------------------------------------------------------------------------------------------------------------------------|--------------------------------------------|

\* Information related to NSAID is based on claims data; over-the-counter medications cannot be measured.

#### Secondary outcome measures - hospitalisation\* (SOh)

| No.   | Outcome                    |
|-------|----------------------------|
| SOh-1 | All-cause hospitalisation. |

\* Hospitalisation includes day and night admissions (emergency admissions) combined and separately.

#### Secondary outcome measure – mortality (SOM)

| No.   | Outcome              |
|-------|----------------------|
| SOM-1 | All-cause mortality. |

#### Additional secondary outcome measures and process measures – polypharmacy indicators (SOp)

| No.   | Outcomes                         |
|-------|----------------------------------|
| SOp-1 | No. of prescriptions per patient |

**Additional secondary outcome measures and process measures – cause-specific hospital admissions (SOh)**

| No.                                                                      | Outcomes                                                                                                                                                                                                                  |
|--------------------------------------------------------------------------|---------------------------------------------------------------------------------------------------------------------------------------------------------------------------------------------------------------------------|
| Cause-specific hospital admissions preceded by high-risk prescribing     |                                                                                                                                                                                                                           |
| SOh-2                                                                    | Hospital admissions due to GI bleeding or ulcers in patients at risk for medication-related GI disorders (defined in SOPim 1-8 measures) in the 12 weeks before admission (31).                                           |
| SOh-3                                                                    | Hospital admissions due to acute heart failure or acute renal failure in patients at risk for medication-related cardiovascular disorders (defined in SOPim 9-17 measures) in the 12 weeks before admission (31).         |
| SOh-4                                                                    | Hospital admissions due to fall related fractures or injuries in patients who were at risk for medication-related falls (defined in SOPim 18-19 measures) in the 12 weeks before admission.                               |
| Cause-specific hospital admissions not preceded by high risk-prescribing |                                                                                                                                                                                                                           |
| SOh-5                                                                    | Hospital admissions due to GI bleeding or ulcer in patients who were not at risk for medication-related GI disorders (defined in SOPim 1-8 measures) in the 12 weeks before admission.                                    |
| SOh-6                                                                    | Hospital admissions due to acute heart failure or acute renal failure in patients who were not at risk for medication-related cardiovascular disorders (defined in SOPim 9-17 measures) in the 12 weeks before admission. |
| SOh-7                                                                    | Hospital admissions due to fall-related fractures or injuries in patients who were not at risk for medication-related falls (defined in SOPim 18-19 measures) in the 12 weeks before admission.                           |

**Additional secondary outcome measures and process measures – underused medication (SOum)**

| No.                  | Outcomes                                                                                                                                                                            |
|----------------------|-------------------------------------------------------------------------------------------------------------------------------------------------------------------------------------|
| Underused medication |                                                                                                                                                                                     |
| SOum-1               | Patients with chronic atrial fibrillation who were not prescribed vitamin K antagonists or direct thrombin inhibitors or direct factor Xa inhibitors in the previous 12 weeks (26). |
| SOum-2               | Patients with coronary, cerebral or peripheral vascular disease who were not prescribed an antiplatelet therapy (aspirin or clopidogrel or prasugrel or ticagrelor) (26).           |
| SOum-3               | Patients with ischemic heart disease that were not prescribed a beta-blocker (26).                                                                                                  |
| SOum-4               | Patients that were prescribed methotrexate without a folic acid supplement in the previous 12 weeks (26).                                                                           |
| SOum-5               | Patients that were receiving opioids regularly without laxatives in the previous 12 weeks (26).                                                                                     |
| SOum-6               | Patients with systolic heart failure and/or documented coronary artery disease that were not prescribed ACE inhibitors or ARB (26).                                                 |
| SOum-7               | Patients with stable systolic heart failure that did not receive appropriate beta-blockers (bisoprolol, nebivolol, metoprolol or carvedilol) (26).                                  |
| SOum-8               | Patients not regularly taking an inhaled $\beta_2$ agonist or antimuscarinic bronchodilator for mild to moderate asthma or COPD (26).                                               |
| SOum-9               | Patients not regularly taking an inhaled corticosteroid for moderate-severe asthma or COPD (26).                                                                                    |

|             |                                                                                                                                                         |
|-------------|---------------------------------------------------------------------------------------------------------------------------------------------------------|
| SOum-<br>10 | Diabetes patients with or without serum biochemical renal impairment that did not receive ACE inhibitors or ARB (if intolerant of ACE inhibitors) (26). |
|-------------|---------------------------------------------------------------------------------------------------------------------------------------------------------|

ACE inhibitor = Angiotensin-Converting Enzyme inhibitor; ARB = Angiotensin Receptor Blocker

This table is based on ATC codes available in the German market and on ICD-10 codes by WHO.

The underlying codes for each secondary outcome can be found in the appendix.

<https://www.dimdi.de/dynamic/.downloads/arzneimittel/atcddd/atc-ddd-amtlich-2020.pdf>

<https://www.dimdi.de/static/de/klassifikationen/icd/icd-10-gm/kode-suche/htmlgm2020/>

See Additional file 5 for more information about the secondary outcome measures.

[About here link to Additional file 5: Specifications related to the secondary outcome measures]

Figure 1. AdAM study flowchart.

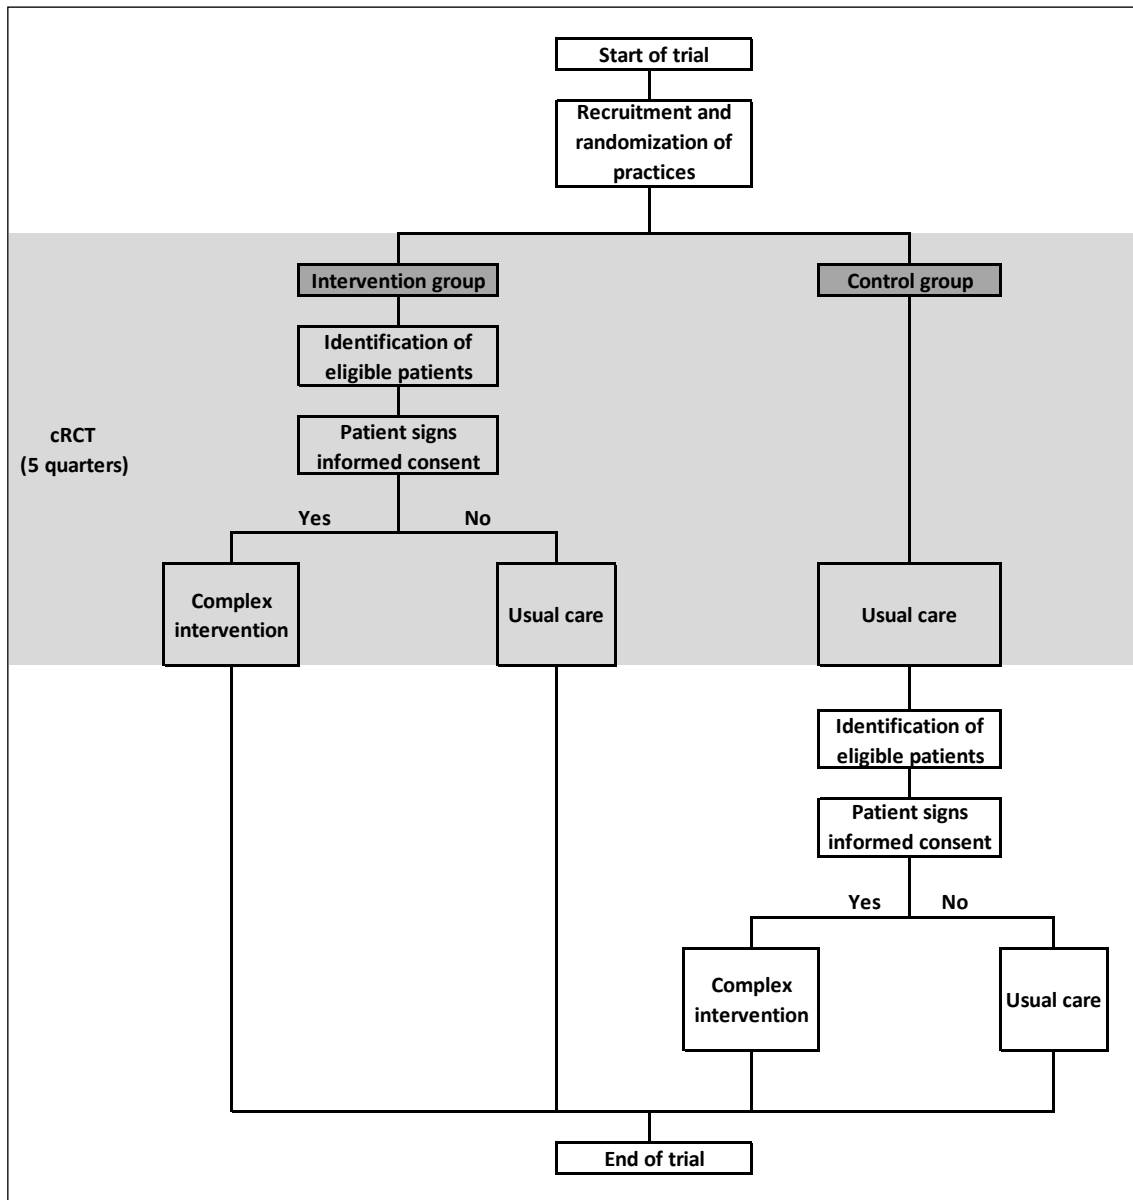

Figure 2. AdAM data availability (time flow)

| Randomization      |                   | 2017        | 2018        |             |             |             | 2019        |             |             |             | 2020        |             |             | 4th quarter          |
|--------------------|-------------------|-------------|-------------|-------------|-------------|-------------|-------------|-------------|-------------|-------------|-------------|-------------|-------------|----------------------|
| Intervention group | Control group     | 4th quarter | 1st quarter | 2nd quarter | 3rd quarter | 4th quarter | 1st quarter | 2nd quarter | 3rd quarter | 4th quarter | 1st quarter | 2nd quarter | 3rd quarter |                      |
| <2nd quarter 2018  | -                 |             |             |             |             |             |             |             |             |             |             |             |             | Statistical analysis |
| 2nd quarter 2018   | -                 |             |             |             |             |             |             |             |             |             |             |             |             |                      |
| 3rd quarter 2018   | -                 |             |             |             |             |             |             |             |             |             |             |             |             |                      |
| 4th quarter 2019   | -                 |             |             |             |             |             |             |             |             |             |             |             |             |                      |
| 1st quarter 2019   |                   |             |             |             |             |             |             |             |             |             |             |             |             |                      |
| 2nd quarter 2019   |                   |             |             |             |             |             |             |             |             |             |             |             |             |                      |
|                    | <2nd quarter 2018 |             |             |             |             |             |             |             |             |             |             |             |             |                      |
|                    | 2nd quarter 2018  |             |             |             |             |             |             |             |             |             |             |             |             |                      |
| -                  | 3rd quarter 2018  |             |             |             |             |             |             |             |             |             |             |             |             |                      |
| -                  | 4th quarter 2018  |             |             |             |             |             |             |             |             |             |             |             |             |                      |
| -                  | 1st quarter 2019  |             |             |             |             |             |             |             |             |             |             |             |             |                      |
| -                  | 2nd quarter 2019  |             |             |             |             |             |             |             |             |             |             |             |             |                      |

\* Randomization on 07/03/2019 was assigned to the second quarter of 2019

|                           |  |                     |
|---------------------------|--|---------------------|
| Data cRCT-phase           |  | Intervention period |
|                           |  | Control period      |
| Data additional available |  | Intervention period |
|                           |  | Control period      |

## **Additional file 1. Brief description of AdAM sub-studies**

### **SUB-STUDY BIELEFELD. HEALTH-ECONOMIC ANALYSIS.**

The aim of this sub-study is to estimate the cost-effectiveness of the AdAM intervention compared to usual care.

The economic analysis will be conducted from a third-party payer perspective, which is the perspective of the statutory health insurance funds in Germany. Health effects will be measured by use of the composite endpoint of the clinical study combining hospital admissions and deaths.

The analysis of all reimbursed direct health care costs will be based on health insurance claims data comprising details on physician visits, inpatient hospital stays, pharmaceuticals (prescription medication), outpatient health care services provided by non-physicians and therapeutic appliances, rehabilitation, and sick pay. Arising costs, such as costs of IT-infrastructure, coordination, maintenance, training and fees, will be used to estimate the overall costs of the AdAM intervention. Fees for physicians will be varied in sensitivity analysis.

The cost-effectiveness of the intervention will be measured by the incremental cost-effectiveness ratio (ICER), which is expressed as the ratio of the difference in overall costs between the control and the intervention group and the difference in effects between both groups. For the ICER calculation of the base case, mean values of costs and effects will be used. In sensitivity analysis, also median values will be used.

Further analyses will be based on the composite endpoint's components (hospital admissions and deaths), on life years gained (LYs), and on quality-adjusted life years (QALYs). To determine the LYs, the remaining life expectancy in both the control and intervention group will be estimated using mortality tables. In order to take into account differences in quality of life between ages when calculating QALYs, age-dependent utility values will be obtained from the literature.

All future costs and health effects will be discounted by 3% per year according to recommendations by the German institute for efficiency and quality in health care (IQWiG). In sensitivity analysis, the discount rate will be varied from 0% to 5%.



## **SUB-STUDY KÖLN. ANALYSIS OF BARRIERS AND FACILITATORS: QUALITATIVE INTERVIEWS AND FOCUS GROUPS WITH PHYSICIANS.**

The aim of this sub-study is to identify factors facilitating or hindering the successful implementation of the intervention from a general practitioner's point of view and evaluate which factors facilitate or hinder the effective performance of systematic medication-checks and optimization. Hereby is expected to get insights how the intervention can be optimized and adapted for general practitioners' high-level acceptance and effectiveness of optimized medication-checks by area-wide implementation.

Therefore a multistage mixed-methods-Approach will be conducted (combination of qualitative and quantitative outcomes) (1).

Level 1: To analyze general practitioners subjectively perceived barriers and resources regarding implementation, guided expert-interviews will be conducted (n= 5-10) (face-to-face-interviews or telephone-interviews) (2,3) to explore the field. Therefore, a convenient sample strategy will be applied. Furthermore, formative evaluation will take part during the trial with two additional time points of qualitative data collection related to relevant emerging topics concerning successful implementation.

Level 2: Results of qualitative data collection will be used for understanding practical orientation patterns of general practitioners (how do they actually use AdAM in real life settings) and their conjunctive experiential space (4). Focus groups with general practitioners of intervention and control group (total, n= 4) will be conducted concerning their experiences and expectations of the project.

Level 3: Results of qualitative data collection will be used to prepare a quantitative general practitioners survey, in which all participating physicians of the intervention group will be asked about barriers and facilitators of the implementation. The survey aims representative detection of general practitioners factors, which facilitate or hinder implementation and identify specific attributes of 'early adapters' and 'late adapters' (5). Quantitative data will be evaluated descriptive and by applying appropriate multiple regression models.

The quality of the qualitative research data collection and analysis in interviews and focus groups is assured by audio recording as well as by transcription according to established standards and by independent coding and subsequent interpretation by a group of researchers. Data analysis will comprise qualitative content analysis according to Kuckartz (6).

Quality assurance concerning the survey conduct is assured by standards of survey development, pretesting, Dillman's Total Design (7) method for increasing response rates and data preparation with the Teleform® software.

#### **SUB-STUDY FRANKFURT. ANALYSIS OF BARRIERS, FACILITATORS AND UNINTENDED CONSEQUENCES: QUALITATIVE INTERVIEWS WITH PATIENTS**

The aim of this sub-study is to identify factors facilitating or hindering the successful implementation of the intervention. We especially focus on patient-perceived unintended consequences of the intervention, e.g. fear resulting from the exchange of information between several doctors or resentments towards the implemented technology.

The sub-study starts after the positive ethics vote dedicated to the qualitative study has been received (second vote). Patients who have already received the intervention, can be included in the study (inclusion criterion: invoiced EBM-code). Patients will be recruited by their general practitioners. General practitioners are trustful “gatekeepers” with the potential to motivate patients to participate (8). After written informed consent, contact details will be forwarded to the Institute of General Practice in Frankfurt/Main. A target sample of 20 patients (balanced with regard to sex, age) out of two or more practices will be included in the study.

We will interview the patients via telephone (9); the interviews are expected to take 20-40 minutes each. The interviewer will use a semi-structured interview guide, which will be pilot-tested in three to four think-aloud-interviews beforehand. Interviews will be audio recorded after informed consent and transcribed verbatim according to established standards (10). Data analysis will comprise qualitative content analysis according to Kuckartz (10). Data will be independently coded and subsequently interpreted by two researchers. The strategy of subsumption will be used to develop content categories mixed deductively-inductively. Data will be evaluated supported by software MAXQDA® at Goethe University in the Institute of General Practice in Frankfurt/Main.

## ADAM PROCESS EVALUATION

A process evaluation is an essential part of the evaluation of complex medical interventions. The process evaluation in AdAM will study the following aspects:

- 1) Numbers of patients per practice from the list of potentially eligible patients that participated in AdAM (“reach”)
- 2) Enrolment rate of GPs, general practices and patients measured as the number of GPs, general practices and patients per potentially eligible number of GPs, general practices and patients during the 15 months from baseline minus baseline (T1–T0) (“reach”).
- 3) Number of patients per practice that were not included in the list of potentially eligible patients that participated in AdAM to evaluate the number of patients who benefit from the AdAM service.
- 4) Quantitative aspects of the intervention: to which extent was the intervention eMMA<sup>®</sup> applied to patients (“dose”)?
  - a. Number of GPs and general practices who use eMMA<sup>®</sup> to print a medication plan 15 months (once a year and more than once a year) from baseline minus baseline (T1–T0).
  - b. Number of safety key figures retrievals and use of patient safety examination to ensure the frequency of use of eMMA<sup>®</sup> safety functionalities (BRAVO quality indicators).
- 5) Qualitative aspects of the intervention: was the intervention eMMA<sup>®</sup> applied as planned (“fidelity”)?
- 6) Adaptation of the intervention: which modifications were made to adjust the intervention to heterogeneous processes in participating practices (“tailoring”)?

Software log files provided by RpDoc<sup>®</sup>Solutions GmbH will comprise the data needed for analyses. Pseudonyms will be used to prevent identification of individual patients, practices or doctors.

Further details of the process evaluation (detailed research questions, MDS) will be provided a priori to the planned analyses.

### ADAM SUSTAINABILITY ASSESSMENT

A fading effect over time in interventions for the improvement of drug management has been mentioned in the literature (11). This sustainability assessment aims to analyze such temporary effects. The goal is to determine if improvements in the prescription of drugs due to eMMA<sup>®</sup> can still be found after more than five quartiles. Therefore, it is necessary for both the intervention group and the control group to receive the intervention, i.e. eMMA<sup>®</sup>.

The sustainability assessment is meant to provide insights on the planned rollout on larger groups. Therefore, it is necessary for the control group to receive the full intervention.

Any further details will be pre-specified in a separate protocol.

For peer review only

## **SUB-STUDY WUPPERTAL: QCAS TO EXPLORE THE RELATIONSHIP BETWEEN ORGANIZATIONAL CONTEXT, IMPLEMENTATION PROCESS AND QUALITY OF CARE**

The aim of this sub-study is to examine the process of effectiveness development, the interaction among key drivers (configurations of success) and to investigate, how these key drivers influence effect sustainability. The analyses of this sub-study will be based on practices of the intervention group of the parallel cluster-randomised controlled trial (c-RCT) and those practices of the control group who joined the intervention mode 15 months after their recruitment. We will include all control group practices who change intervention status at least until 30/06/2020.

QCAs will be based on a conceptual model comprising contextual and implementation process factors affecting intervention's effectiveness. Research suggests that attributes characterising the organisational context are important for the development of habitual behaviour and the successful adoption of interventions (12). In addition, contemporary definitions of organisations have evolved from a closed-system perspective (organisations = isolated systems with no interaction with their environment) to an open-system perspective. Therefore, organisational attributes will be defined on three distinct levels of analysis: 1) the behaviour of individuals, 2) the structural features and 3) the organisation viewed as an entity operating in a larger system of relations (13).

### *Analytic methods*

In a first step, fuzzy set qualitative comparative analysis will be used to identify pathways – that is, different combinations of organisational attributes and implementation process characteristics – associated with:

1. sites' success in attaining a relative risk reduction in the primary end point at the end of the c-RCT (change is measured in comparison to the control groups' results) – QCA 1,
2. short term effects (change of secondary endpoints after the first five months of intervention) – QCA 2.

In a second step, the findings of the first QCA will be integrated in a multilevel model (two-level HML) in which the cross-level interactions of the pathways will be investigated and mechanisms suited for reaching sustainability at the end of a three month follow-up phase will be explored.

To prepare results of the first QCA for use in HLM, a categorisation of each study site as a member of one of the pathways is planned. Only those practices will be included in the multilevel model that are member of a configuration sufficient for outcome and part of c-RCT's intervention group. To explore mechanisms suited for a sustainable intervention effect, the two-level HLM will be estimated with the pathways (configurations) at the macro level. At the micro level a variable, which measures the stability of the attained performance level (dichotomous definition: "1" if there is no increase in all-causes hospital admissions and all-causes deaths per practice over the follow-up phase, otherwise "0") will be included. As explanatory variables the four constructs of the normalisation process theory (NPT; coherence, cognitive participation, collective action, reflexive monitoring) will be considered. This construct will be measured at the beginning of the follow-up phase and by applying the instrument NoMAD (14). They will describe physicians' views about how an intervention impacts on their work, and their expectations about whether it could become a routine part of their work.

1  
2  
3  
4  
5 Site sampling and data source:

6  
7 The first QCA and the multilevel model will include only practices of the intervention group. The  
8 second QCA will use practices of the control group as well, after this group has joined the  
9 intervention mode.  
10

11 Parameters corresponding to factors in the conceptual model will be derived from a survey,  
12 which is organised in two waves (first in 2019, second in 2020). The outcome measure will be  
13 based on secondary data (claims data). In addition, structural data of the practices (e.g. practice  
14 infrastructure, patient structure) and use of support will be obtained from other project partners  
15 (e.g. by extracting information out of CDSS log files).  
16  
17  
18  
19  
20  
21  
22  
23  
24  
25  
26  
27  
28  
29  
30  
31  
32  
33  
34  
35  
36  
37  
38  
39  
40  
41  
42  
43  
44  
45  
46  
47  
48  
49  
50  
51  
52  
53  
54  
55  
56  
57  
58  
59  
60

## REFERENCES

1. Mayring P. Evidenztriangulation in der Gesundheitsforschung. *KZfSS Kölner Zeitschrift für Soziologie und Sozialpsychologie*. 2017 Oct 10;69(S2):415–34.
2. Bogner A, Littig B, Menz W. *Experteninterviews. Theorien, Methoden, Anwendungsfelder*. 3., grundlegend überarbeitete Auflage. Wiesbaden: VS Verlag für Sozialwissenschaft; 2009.
3. Christmann G. Telefonische Experteninterviews. In: Alexander Bogner, Beate Littig und Wolfgang Menz (Hg): *Experteninterviews Theorien, Methoden, Anwendungsfelder 3, grundlegend überarbeitete Auflage*. Wiesbaden: VS Verlag für Sozialwissenschaften; 2009.
4. Bohnsack R. Dokumentarische Methode und sozialwissenschaftliche Hermeneutik. *Zeitschrift für Erziehungswiss*. 2003;6(4):550–70.
5. Rogers EM. Diffusion of preventive innovations. *Addict Behav*. 2002 Nov;27(6):989–93.
6. Kuckartz U. *Einführung in die computergestützte Analyse qualitativer Daten*. Wiesbaden: VS Verlag für Sozialwissenschaften; 2007.
7. Dillman DA, Smyth JS, Christian LM. *Internet, phone, mail, and mixed-mode surveys: the tailored design method*. Wiley; 2014. 528 p.
8. Helfferich F. *Die Qualität qualitativer Daten. Manual für die Durchführung qualitativer Interviews*, 3. Überarbeitete Auflage. Wiesbaden: GWV Fachverlage GmbH; 2009.
9. Flick U. Leitfaden-Interviews. In: *Qualitative Sozialforschung Eine Einführung*. 7th ed. Reinbeck bei Hamburg: Rowohlt; 2007. p. 194–226.
10. Kuckartz U. *Qualitative Inhaltsanalyse. Methoden, Praxis, Computerunterstützung*. Weinheim: Beltz Juventa; 2012.
11. Avery AJ, Rodgers S, Cantrill JA, Armstrong S, Cresswell K, Eden M, et al. A pharmacist-led information technology intervention for medication errors (PINCER): a multicentre, cluster randomised, controlled trial and cost-effectiveness analysis. *Lancet* [Internet]. 2012 Apr;379(9823):1310–9. Available from: <http://linkinghub.elsevier.com/retrieve/pii/S0140673611618175>
12. Damschroder LJ, Aron DC, Keith RE, Kirsh SR, Alexander JA, Lowery JC. Fostering implementation of health services research findings into practice: a consolidated framework for advancing implementation science. *Implement Sci*. 2009 Dec 7;4(1):50.
13. Hogg W, Rowan M, Russell G, Geneau R, Muldoon L. Framework for primary care organizations: the importance of a structural domain. *Int J Qual Heal Care*. 2008 Oct;20(5):308–13.
14. Finch T, Girling M, May C, Mair F, Murray E, Treweek S, et al. Nomad: Implementation measure based on Normalization Process Theory [Internet]. 2015 [cited 2018 Jan 25]. Available from: <http://www.normalizationprocess.org/>

## Additional file 2. RpDoc® medical database

### Screening for and assessment of drug interactions

#### Goal setting

The medical-scientific editorial team of RpDoc® Solutions GmbH identifies drug interactions by continuously monitoring medical-scientific publications and the notifications of national and international regulatory authorities. A structured process is then employed to systematically analyze and assess them. To help doctors and pharmacists analyze and evaluate drug therapies, the updated knowledge of management options concerning clinically relevant interactions is then summarized and the interactions and management options, along with references, entered into the RpDoc® medical database.

In addition, the RpDoc® medical database contains recommendations made to avoid specific drug combinations that may result from the parallel application of guidelines for individual diseases in patients with multimorbidity. These recommendations have been unanimously agreed upon by medical and pharmaceutical societies and are published as S2K Guidelines by the AWMF Working Group of Scientific Medical Societies.

The basic principles of screening for and evaluating interactions for the RpDoc® medical databases are presented below.

#### Screening for interactions

The medical-scientific editorial team of RpDoc® Solutions GmbH monitors more than 8,000 peer-reviewed scientific journals listed in the EMBASE or the PUBMED database every week. Risk warnings issued by American and European regulatory authorities for medicinal products, the FDA and EMA, as well as by the German Federal authorities responsible for pharmaceuticals, the Federal Institute for Drugs and Medical Devices (BfArM), and the Paul-Ehrlich Institute, are also monitored weekly. Risk warnings issued by the Drug Commission of the German Medical Association (AkdÄ) and the Drug Commission of German Pharmacists (AMK) are also taken into account.

#### Assessment of causality

The WHO UMC algorithm is used to evaluate the causality of adverse drug reactions and the information entered into the RpDoc® medical database.

The various methodological approaches available to categorize the causality of adverse drug reactions were compared in a review published in 2018[1]. The WHO algorithm (WHO-UMC) proved to be the most suitable for assessing the causality of adverse drug reactions resulting from drug interactions. It was developed for the International Drug Monitoring Program by the WHO, in collaboration with national pharmacovigilance centers, and is also suitable for the assessment of warning signals stemming from case reports [2]. In contrast to the Naranjo algorithm, WHO-UMC is also suitable for assessing organ toxicity, side effects of overdoses, and drug interactions [3, 4].

DIPS (Drug Interaction Probability Scale) criteria were used to evaluate case descriptions of drug interactions [5].



### Assessment of quality of evidence

The evaluation of quality of evidence is based on the GRADE system (Grading of recommendations Assessment, Development and Evaluation) [6]. In evidence evaluations, prospective randomized studies and meta-analyses are generally assumed to provide high quality evidence. However, indications of adverse drug interactions are often found in case reports and non-randomized studies. Such warnings as those found in Dear Doctor letters from pharmaceutical manufacturers and drug safety mails from the Drug Commission of the German Medical Association can nevertheless be plausible and justify strong recommendations on how to avoid a specific risk.

In the absence of randomized studies, GRADE can still be used. The instrument of "Good Practice Statements" is suitable for situations in which no prospective randomized studies exist, but convincing indirect evidence is available [7]. Good practice statements can justify strong recommendations even if no randomized studies exist, as long as indirect evidence unequivocally supports the recommendation, and other criteria are met [7]. In this case, different sources of evidence can be informally linked (linked evidence) to one another in order to provide information on net benefit [7].

### An example of an evaluation of clinical relevance

For liability reasons, pharmaceutical manufacturers provide information on every conceivable risk associated with the use of their drugs, both individually and in combination with other medications, regardless of clinical relevance. When analyzing a drug therapy, consideration of these risk warnings will result in consideration of a high proportion of irrelevant warnings ("alert overkill") [8]. In order to achieve practical relevance, it is necessary to limit warnings to those that are clinically relevant, i.e. to warnings that should be considered when making therapy decisions [9, 10]. The resulting difference is illustrated in the following example:

Product information (Section 4.5) on siponimod (Mayzent) notes that siponimod should not be administered in combination with medicines that "prolong the QT interval". It is only logical that this contraindication is consistently found in databases that contain product information, e.g. in the IBM Micromedex database (classified as "major" = red).

Studies have been submitted by the pharmaceutical company for approval and are available in the European Product Assessment Report of the EMA. These clearly show that siponimod does not increase the QT interval: "A thorough QT study was conducted (study A2118). No effect of siponimod on the QTc interval was detected. ... metabolites are not expected to have significant effects on the QTc interval." (EMA / CHMP / 652767/2019).

However, the studies also show that siponimod lowers the heart rate. A reduction in heart rate extends the intervals measured by ECGs, including the QT interval, but not the frequency-corrected QT interval that determines the risk of sudden cardiac death. The RpDoc® medical database therefore includes no warning against administering siponimod at the same time as QT interval prolonging drugs, but rather against drugs that may result in additive heart rate reduction.

### Design of the recommendations

1  
2  
3 The design of recommendations has a significant influence on their applicability and effectiveness in  
4 practice. In order to facilitate the implementation of recommendations, management options aimed  
5 at minimizing risks should be provided in addition to descriptions of avoidable risks [11]. When a  
6 warning has high specificity, e.g. because it names particularly affected patient groups or dosages, its  
7 effectiveness is increased [10].  
8

9  
10 When formulating recommendations for action, the recommendations developed by a group of  
11 experts on the content of interaction warnings are taken into account [12]. In addition to information  
12 on the unwanted effects of a specific drug combination, information on predisposing and risk-  
13 minimizing factors, the incidence of adverse effects, and the level of evidence concerning the risk of  
14 interaction, are also provided. Pharmacological plausibility and the mechanism of interaction are  
15 presented in addition to management options. In particular, references are made to equivalent  
16 therapeutic alternatives, as well as recommended surveillance measures in case the drug  
17 combination is maintained.  
18  
19

### 20 21 22 Recommendations for action on drug therapies in multimorbidity

23  
24 There are guidelines for the evidence-based treatment of numerous diseases, but the parallel  
25 application of guidelines for each individual disease can, in multimorbidity, lead to unfavorable and  
26 risky drug combinations [13].  
27

28 To resolve these therapeutic conflicts, medical and pharmaceutical scientific societies develop  
29 recommendations for action that the AWMF, with the support of the AdAM and TOP innovation fund  
30 projects, publishes in S2K Guidelines. RpDoc® Solutions GmbH is involved in both these innovation  
31 fund projects as a technology partner, and recommendations developed for drug therapies in  
32 multimorbidity are continuously updated in the RpDoc® medical database.  
33  
34

35 For an overview of the AdAM and TOP projects, please see the brief summary provided by the joint  
36 federal committee (<https://innovationsfonds.g-ba.de/>).  
37  
38

### 39 40 References:

- 41 1. Behera, S.K., et al., Comparison of different methods for causality assessment of adverse  
42 drug reactions. *Int J Clin Pharm*, 2018. 40(4): p. 903-910.
- 43 2. Meyboom, R.H., et al., Causal or casual? The role of causality assessment in  
44 pharmacovigilance. *Drug Saf*, 1997. 17(6): p. 374-89.
- 45 3. Agbabiaka, T.B., J. Savovic, and E. Ernst, Methods for causality assessment of adverse drug  
46 reactions: a systematic review. *Drug Saf*, 2008. 31(1): p. 21-37.
- 47 4. Thaker, S.J., et al., Evaluation of inter-rater agreement between three causality assessment  
48 methods used in pharmacovigilance. *J Pharmacol Pharmacother*, 2016. 7(1): p. 31-3.
- 49 5. Horn, J.R., P.D. Hansten, and L.N. Chan, Proposal for a new tool to evaluate drug interaction  
50 cases. *Ann Pharmacother*, 2007. 41(4): p. 674-80.
- 51 6. Guyatt, G., et al., GRADE guidelines: 1. Introduction—GRADE evidence profiles and summary  
52 of findings tables. *Journal of Clinical Epidemiology*, 2011. 64(4): p. 383-394.
- 53 7. Guyatt, G.H., et al., Guideline panels should seldom make good practice statements:  
54 guidance from the GRADE Working Group. *Journal of Clinical Epidemiology*, 2016. 80: p. 3-7.
- 55 8. Glassman, P.A., et al., Improving recognition of drug interactions: benefits and barriers to  
56 using automated drug alerts. *Med. Care*, 2002. 40(12): p. 1161-1171.  
57  
58  
59  
60

- 1
- 2
- 3 9. Wright, A., et al., Reduced Effectiveness of Interruptive Drug-Drug Interaction Alerts after
- 4 Conversion to a Commercial Electronic Health Record. *J Gen Intern Med*, 2018.
- 5
- 6 10. Heringa, M., et al., Better specification of triggers to reduce the number of drug interaction
- 7 alerts in primary care. *Int J Med Inform*, 2018. 109: p. 96-102.
- 8
- 9 11. Seidling, H.M., et al., Factors influencing alert acceptance: a novel approach for predicting
- 10 the success of clinical decision support. *J Am Med Inform Assoc*, 2011. 18(4): p. 479-84.
- 11
- 12 12. Floor-Schreuder, A., et al., Checklist for standardized reporting of drug-drug interaction
- 13 management guidelines. *Eur J Clin Pharmacol*, 2014. 70(3): p. 313-8.
- 14
- 15 13. Dumbreck, S., et al., Drug-disease and drug-drug interactions: systematic examination of
- 16 recommendations in 12 UK national clinical guidelines. *BMJ*, 2015. 350: p. h949.
- 17
- 18
- 19
- 20
- 21
- 22
- 23
- 24
- 25
- 26
- 27
- 28
- 29
- 30
- 31
- 32
- 33
- 34
- 35
- 36
- 37
- 38
- 39
- 40
- 41
- 42
- 43
- 44
- 45
- 46
- 47
- 48
- 49
- 50
- 51
- 52
- 53
- 54
- 55
- 56
- 57
- 58
- 59
- 60

For peer review only

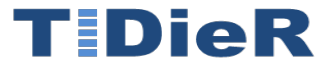

Template for Intervention  
Description and Replication

## The TIDieR (Template for Intervention Description and Replication) Checklist\*:

Information to include when describing an intervention and the location of the information

| Item number | Item                                                                                                                                                                                                                                                                                                 | Where located **                              |                   |
|-------------|------------------------------------------------------------------------------------------------------------------------------------------------------------------------------------------------------------------------------------------------------------------------------------------------------|-----------------------------------------------|-------------------|
|             |                                                                                                                                                                                                                                                                                                      | Primary paper<br>(page or appendix<br>number) | Other † (details) |
|             | <b>BRIEF NAME</b>                                                                                                                                                                                                                                                                                    |                                               |                   |
| 1.          | Provide the name or a phrase that describes the intervention.                                                                                                                                                                                                                                        | 1, 11                                         | _____             |
|             | <b>WHY</b>                                                                                                                                                                                                                                                                                           |                                               |                   |
| 2.          | Describe any rationale, theory, or goal of the elements essential to the intervention.                                                                                                                                                                                                               | 10,11                                         | _____             |
|             | <b>WHAT</b>                                                                                                                                                                                                                                                                                          |                                               |                   |
| 3.          | Materials: Describe any physical or informational materials used in the intervention, including those provided to participants or used in intervention delivery or in training of intervention providers.<br>Provide information on where the materials can be accessed (e.g. online appendix, URL). | 16                                            | _____             |
| 4.          | Procedures: Describe each of the procedures, activities, and/or processes used in the intervention, including any enabling or support activities.                                                                                                                                                    | 16, 17                                        | _____             |
|             | <b>WHO PROVIDED</b>                                                                                                                                                                                                                                                                                  |                                               |                   |
| 5.          | For each category of intervention provider (e.g. psychologist, nursing assistant), describe their expertise, background and any specific training given.                                                                                                                                             | 17                                            | _____             |
|             | <b>HOW</b>                                                                                                                                                                                                                                                                                           |                                               |                   |
| 6.          | Describe the modes of delivery (e.g. face-to-face or by some other mechanism, such as internet or telephone) of the intervention and whether it was provided individually or in a group.                                                                                                             | 16, 17                                        | _____             |
|             | <b>WHERE</b>                                                                                                                                                                                                                                                                                         |                                               |                   |
| 7.          | Describe the type(s) of location(s) where the intervention occurred, including any necessary infrastructure or relevant features.                                                                                                                                                                    | 16, 17                                        | _____             |

|    |                          |                                                                                                                                                                                   |     |
|----|--------------------------|-----------------------------------------------------------------------------------------------------------------------------------------------------------------------------------|-----|
| 1  |                          |                                                                                                                                                                                   |     |
| 2  | <b>WHEN and HOW MUCH</b> |                                                                                                                                                                                   |     |
| 3  | 8.                       | Describe the number of times the intervention was delivered and over what period of time including the number of sessions, their schedule, and their duration, intensity or dose. | 16  |
| 4  |                          |                                                                                                                                                                                   |     |
| 5  |                          |                                                                                                                                                                                   |     |
| 6  | <b>TAILORING</b>         |                                                                                                                                                                                   |     |
| 7  |                          |                                                                                                                                                                                   |     |
| 8  | 9.                       | If the intervention was planned to be personalised, titrated or adapted, then describe what, why, when, and how.                                                                  | N/A |
| 9  |                          |                                                                                                                                                                                   |     |
| 10 |                          |                                                                                                                                                                                   |     |
| 11 | <b>MODIFICATIONS</b>     |                                                                                                                                                                                   |     |
| 12 |                          |                                                                                                                                                                                   |     |
| 13 | 10.*                     | If the intervention was modified during the course of the study, describe the changes (what, why, when, and how).                                                                 | N/A |
| 14 |                          |                                                                                                                                                                                   |     |
| 15 |                          |                                                                                                                                                                                   |     |
| 16 | <b>HOW WELL</b>          |                                                                                                                                                                                   |     |
| 17 |                          |                                                                                                                                                                                   |     |
| 18 | 11.                      | Planned: If intervention adherence or fidelity was assessed, describe how and by whom, and if any strategies were used to maintain or improve fidelity, describe them.            | 11  |
| 19 |                          |                                                                                                                                                                                   |     |
| 20 |                          |                                                                                                                                                                                   |     |
| 21 | 12.*                     | Actual: If intervention adherence or fidelity was assessed, describe the extent to which the intervention was delivered as planned.                                               | N/A |
| 22 |                          |                                                                                                                                                                                   |     |
| 23 |                          |                                                                                                                                                                                   |     |

\*\* **Authors** - use N/A if an item is not applicable for the intervention being described. **Reviewers** – use ‘?’ if information about the element is not reported/not sufficiently reported.

† If the information is not provided in the primary paper, give details of where this information is available. This may include locations such as a published protocol or other published papers (provide citation details) or a website (provide the URL).

‡ If completing the TIDieR checklist for a protocol, these items are not relevant to the protocol and cannot be described until the study is complete.

\* We strongly recommend using this checklist in conjunction with the TIDieR guide (see *BMJ* 2014;348:g1687) which contains an explanation and elaboration for each item.

\* The focus of TIDieR is on reporting details of the intervention elements (and where relevant, comparison elements) of a study. Other elements and methodological features of studies are covered by other reporting statements and checklists and have not been duplicated as part of the TIDieR checklist. When a **randomised trial** is being reported, the TIDieR checklist should be used in conjunction with the CONSORT statement (see [www.consort-statement.org](http://www.consort-statement.org)) as an extension of **Item 5 of the CONSORT 2010 Statement**. When a **clinical trial protocol** is being reported, the TIDieR checklist should be used in conjunction with the SPIRIT statement as an extension of **Item 11 of the SPIRIT 2013 Statement** (see [www.spirit-statement.org](http://www.spirit-statement.org)). For alternate study designs, TIDieR can be used in conjunction with the appropriate checklist for that study design (see [www.equator-network.org](http://www.equator-network.org)).

## Additional file 4. CONSORT 2010 checklist of information to include when reporting a cluster randomised trial

| Section/Topic                    | Item No | Standard Checklist item                                                                                                                | Extension for cluster designs                                                                | Page No * |
|----------------------------------|---------|----------------------------------------------------------------------------------------------------------------------------------------|----------------------------------------------------------------------------------------------|-----------|
| <b>Title and abstract</b>        |         |                                                                                                                                        |                                                                                              |           |
|                                  | 1a      | Identification as a randomised trial in the title                                                                                      | Identification as a cluster randomised trial in the title                                    | 1         |
|                                  | 1b      | Structured summary of trial design, methods, results, and conclusions (for specific guidance see CONSORT for abstracts) <sup>1,2</sup> | See table 2                                                                                  | 6         |
| <b>Introduction</b>              |         |                                                                                                                                        |                                                                                              |           |
| <b>Background and objectives</b> | 2a      | Scientific background and explanation of rationale                                                                                     | Rationale for using a cluster design                                                         | 9         |
|                                  | 2b      | Specific objectives or hypotheses                                                                                                      | Whether objectives pertain to the cluster level, the individual participant level or both    | 10        |
| <b>Methods</b>                   |         |                                                                                                                                        |                                                                                              |           |
| <b>Trial design</b>              | 3a      | Description of trial design (such as parallel, factorial) including allocation ratio                                                   | Definition of cluster and description of how the design features apply to the clusters       | 11        |
|                                  | 3b      | Important changes to methods after trial commencement (such as eligibility criteria), with reasons                                     |                                                                                              | NA        |
| <b>Participants</b>              | 4a      | Eligibility criteria for participants                                                                                                  | Eligibility criteria for clusters                                                            | 11        |
|                                  | 4b      | Settings and locations where the data were collected                                                                                   |                                                                                              | 11        |
| <b>Interventions</b>             | 5       | The interventions for each group with sufficient details to allow replication, including how and when they were actually administered  | Whether interventions pertain to the cluster level, the individual participant level or both | 14        |
| <b>Outcomes</b>                  | 6a      | Completely defined pre-specified primary and                                                                                           | Whether outcome measures pertain to the cluster level, the                                   | 16        |

|                                         |     |                                                                                                                                                                                             |                                                                                                                                                                                                                         |       |
|-----------------------------------------|-----|---------------------------------------------------------------------------------------------------------------------------------------------------------------------------------------------|-------------------------------------------------------------------------------------------------------------------------------------------------------------------------------------------------------------------------|-------|
|                                         |     | secondary outcome measures, including how and when they were assessed                                                                                                                       | individual participant level or both                                                                                                                                                                                    |       |
|                                         | 6b  | Any changes to trial outcomes after the trial commenced, with reasons                                                                                                                       |                                                                                                                                                                                                                         | NA    |
| <b>Sample size</b>                      | 7a  | How sample size was determined                                                                                                                                                              | Method of calculation, number of clusters(s) (and whether equal or unequal cluster sizes are assumed), cluster size, a coefficient of intracluster correlation (ICC or <i>k</i> ), and an indication of its uncertainty | 21    |
|                                         | 7b  | When applicable, explanation of any interim analyses and stopping guidelines                                                                                                                |                                                                                                                                                                                                                         | 20    |
| <b>Randomisation:</b>                   |     |                                                                                                                                                                                             |                                                                                                                                                                                                                         |       |
| <b>Sequence generation</b>              | 8a  | Method used to generate the random allocation sequence                                                                                                                                      |                                                                                                                                                                                                                         | 13    |
|                                         | 8b  | Type of randomisation; details of any restriction (such as blocking and block size)                                                                                                         | Details of stratification or matching if used                                                                                                                                                                           | 13    |
| <b>Allocation concealment mechanism</b> | 9   | Mechanism used to implement the random allocation sequence (such as sequentially numbered containers), describing any steps taken to conceal the sequence until interventions were assigned | Specification that allocation was based on clusters rather than individuals and whether allocation concealment (if any) was at the cluster level, the individual participant level or both                              | 13    |
| <b>Implementation</b>                   | 10  | Who generated the random allocation sequence, who enrolled participants, and who assigned participants to interventions                                                                     | Replace by 10a, 10b and 10c                                                                                                                                                                                             | 12-14 |
|                                         | 10a |                                                                                                                                                                                             | Who generated the random allocation sequence, who enrolled clusters, and who assigned clusters to interventions                                                                                                         | 12-14 |

|                                                             |     |                                                                                                                                                                     |                                                                                                                                                   |
|-------------------------------------------------------------|-----|---------------------------------------------------------------------------------------------------------------------------------------------------------------------|---------------------------------------------------------------------------------------------------------------------------------------------------|
|                                                             | 10b | Mechanism by which individual participants were included in clusters for the purposes of the trial (such as complete enumeration, random sampling)                  | 12-14                                                                                                                                             |
|                                                             | 10c | From whom consent was sought (representatives of the cluster, or individual cluster members, or both), and whether consent was sought before or after randomisation | 12-14                                                                                                                                             |
| <b>Blinding</b>                                             |     |                                                                                                                                                                     |                                                                                                                                                   |
|                                                             | 11a | If done, who was blinded after assignment to interventions (for example, participants, care providers, those assessing outcomes) and how                            | 14                                                                                                                                                |
|                                                             | 11b | If relevant, description of the similarity of interventions                                                                                                         | NA                                                                                                                                                |
| <b>Statistical methods</b>                                  |     |                                                                                                                                                                     |                                                                                                                                                   |
|                                                             | 12a | Statistical methods used to compare groups for primary and secondary outcomes                                                                                       | How clustering was taken into account<br>21                                                                                                       |
|                                                             | 12b | Methods for additional analyses, such as subgroup analyses and adjusted analyses                                                                                    | NA                                                                                                                                                |
| <b>Results</b>                                              |     |                                                                                                                                                                     |                                                                                                                                                   |
| <b>Participant flow (a diagram is strongly recommended)</b> |     |                                                                                                                                                                     |                                                                                                                                                   |
|                                                             | 13a | For each group, the numbers of participants who were randomly assigned, received intended treatment, and were analysed for the primary outcome                      | For each group, the numbers of clusters that were randomly assigned, received intended treatment, and were analysed for the primary outcome<br>NA |
|                                                             | 13b | For each group, losses and exclusions after randomisation, together with reasons                                                                                    | For each group, losses and exclusions for both clusters and individual cluster members<br>NA                                                      |
| <b>Recruitment</b>                                          |     |                                                                                                                                                                     |                                                                                                                                                   |
|                                                             | 14a | Dates defining the periods of recruitment and follow-up                                                                                                             | NA                                                                                                                                                |



|                                |     |                                                                                                                                                   |                                                                                                                                            |    |
|--------------------------------|-----|---------------------------------------------------------------------------------------------------------------------------------------------------|--------------------------------------------------------------------------------------------------------------------------------------------|----|
|                                | 14b | Why the trial ended or was stopped                                                                                                                |                                                                                                                                            | NA |
| <b>Baseline data</b>           | 15  | A table showing baseline demographic and clinical characteristics for each group                                                                  | Baseline characteristics for the individual and cluster levels as applicable for each group                                                | NA |
| <b>Numbers analysed</b>        | 16  | For each group, number of participants (denominator) included in each analysis and whether the analysis was by original assigned groups           | For each group, number of clusters included in each analysis                                                                               | NA |
| <b>Outcomes and estimation</b> | 17a | For each primary and secondary outcome, results for each group, and the estimated effect size and its precision (such as 95% confidence interval) | Results at the individual or cluster level as applicable and a coefficient of intracluster correlation (ICC or k) for each primary outcome | NA |
|                                | 17b | For binary outcomes, presentation of both absolute and relative effect sizes is recommended                                                       |                                                                                                                                            | NA |
| <b>Ancillary analyses</b>      | 18  | Results of any other analyses performed, including subgroup analyses and adjusted analyses, distinguishing pre-specified from exploratory         |                                                                                                                                            | NA |
| <b>Harms</b>                   | 19  | All important harms or unintended effects in each group (for specific guidance see CONSORT for harms <sup>3</sup> )                               |                                                                                                                                            | NA |
| <b>Discussion</b>              |     |                                                                                                                                                   |                                                                                                                                            | 25 |
| <b>Limitations</b>             | 20  | Trial limitations, addressing sources of potential bias, imprecision, and, if relevant, multiplicity of analyses                                  |                                                                                                                                            | 25 |
| <b>Generalisability</b>        | 21  | Generalisability (external validity, applicability) of the trial findings                                                                         | Generalisability to clusters and/or individual participants (as relevant)                                                                  | NA |
| <b>Interpretation</b>          | 22  | Interpretation consistent with results, balancing benefits and harms, and                                                                         |                                                                                                                                            | NA |

|                          |    |                                                                                 |    |
|--------------------------|----|---------------------------------------------------------------------------------|----|
|                          |    | considering other relevant evidence                                             |    |
| <b>Other information</b> |    |                                                                                 |    |
| <b>Registration</b>      | 23 | Registration number and name of trial registry                                  | 7  |
| <b>Protocol</b>          | 24 | Where the full trial protocol can be accessed, if available                     | NA |
| <b>Funding</b>           | 25 | Sources of funding and other support (such as supply of drugs), role of funders | 26 |

\* Note: page numbers optional depending on journal requirements

## REFERENCES

- 1 Hopewell S, Clarke M, Moher D, Wager E, Middleton P, Altman DG, et al. CONSORT for reporting randomised trials in journal and conference abstracts. *Lancet* 2008, 371:281-283
- 2 Hopewell S, Clarke M, Moher D, Wager E, Middleton P, Altman DG at al (2008) CONSORT for reporting randomized controlled trials in journal and conference abstracts: explanation and elaboration. *PLoS Med* 5(1): e20
- 3 Ioannidis JP, Evans SJ, Gotzsche PC, O'Neill RT, Altman DG, Schulz K, Moher D. Better reporting of harms in randomized trials: an extension of the CONSORT statement. *Ann Intern Med* 2004; 141(10):781-788.

### Additional file 5. Specifications related to the secondary outcome measures

Each of the condition listed (•) must be met for the respective secondary outcome to be fulfilled

#### SOpim-1:

- Diagnosed with any of the following ICD-10: K20-21, K25-28
- Prescribed ATC M01A (except M01AB55 and M01AE52)
- Not prescribed ATC A02B

#### SOpim-2:

- Age 65+
- Prescribed ATC M01A (except M01AB55 and M01AE52)
- Not prescribed ATC A02B

#### SOpim-3

- Prescribed ATC B01AC
- Prescribed ATC M01A (except M01AB55 and M01AE52)
- Not prescribed ATC A02B

#### SOpim-4

- Prescribed either ATC B01AC34 or a combination of ATC B01AC06 with any of the following ATC: B01AC04, B01AC24, B01AC22
- Not prescribed ATC A02B

#### SOpim-5

- Prescribed any of the following ATC: B01AA, B01AE, B01AF
- Prescribed ATC M01A (except M01AB55 and M01AE52)
- Not prescribed ATC A02B

#### SOpim-6

- Prescribed ATC B01AA
- Prescribed ATC B01AC
- Not prescribed ATC A02B

#### SOpim-7

- Prescribed any of the following ATC: G04BX18, N06AB, N06AX16, N06AX17, N06AX21
- Prescribed ATC M01A (except M01AB55 and M01AE52)
- Not prescribed ATC A02B

#### SOpim-8

- Prescribed any of the following ATC: H02AB, H02BX
- Prescribed ATC M01A (except M01AB55 and M01AE52)
- Not prescribed ATC A02B

#### SOpim-9

- Prescribed ATC C09
- Prescribed ATC M01

## SOpim-10

- Prescribed any of the following ATC: C03AA, C03BA, C03CA, C03D, C03E
- Prescribed ATC M01A

## SOpim-11

- Diagnosed with ICD-10 I50
- Prescribed ATC M01A

## SOpim-12

- Diagnosed with ICD-10 I50
- Prescribed ATC N06AA

## SOpim-13

- Prescribed any of the following ATC: C03D, C09
- Prescribed ATC A12BA

## SOpim-14

- Diagnosed with ICD-10 I50
- Prescribed any of the following ATC: C07AA, C07BA, C07DA, S01ED (except S01ED02)

## SOpim-15

- Age 65+
- Prescribed any of the following ATC: A03FA03, A04AA01, B01AC23, C01BC04, C01BD01, C01BD07, C07AA07, C08DA81, H01BA04, L01XE12, L01XX35, N05AA02, N05AC02, N05AD01, N05AD08, N05AF03, N05AG02, N05AL01, N06AB04, N06AB10, N06DA02, N07BC02, P01BA01, P01BA02

## SOpim-16

- Any of the following:
  1.
    - Prescribed any two of the following ATC: A03FA03, A04AA01, B01AC23, C01BC04, C01BD01, C01BD07, C07AA07, C08DA81, H01BA04, L01XE12, L01XX35, N05AA02, N05AC02, N05AD01, N05AD08, N05AF03, N05AG02, N05AL01, N06AB04, N06AB10, N06DA02, N07BC02, P01BA01, P01BA02
  2.
    - Prescribed any of the following ATC: C01BC04, N05AC02, N06DA02, A04AA01, N05AD01, N06AB04, N06AB10
    - Prescribed any of the following ATC: A08AA62, N06AX12, N07BA02, H05BX01, N06AB03, N06AB05, C08DA81
  3.
    - Prescribed any of the following ATC: A04AA01, N05AD01, N06AB04, N06AB10, A03FA03, B01AC23, C08DA81, N05AG02, N07BC02
    - Prescribed any of the following ATC: A02BD04, A02BD05, J01FA09, J05AE02, J02AC02, J02AB02, J05AE03, J05AP53, J05AR10, J05AE01, L01XX47, L01XE42, J01FA15
  4.
    - Diagnosed with any of the following ICD-10: I50, R00.1, I49.5, I49.8

- Prescribed any of the following ATC: A03FA03, A04AA01, B01AC23, C01BC04, C01BD01, C01BD07, C07AA07, C08DA81, H01BA04, L01XE12, L01XX35, N05AA02, N05AC02, N05AD01, N05AD08, N05AF03, N05AG02, N05AL01, N06AB04, N06AB10, N06DA02, N07BC02, P01BA01, P01BA02

#### SOpim-17

- Prescribed ATC C01AA
- Prescribed any of the following ATC: C03AA, C03BA, C03CA, C07B, C07C, C08GA23, C09BA, C09BX01, C09BX03, C09DA, C09DX01, C09DX03, C09DX06, C09DX07, C09XA52, C09XA54
- Not prescribed ATC A12BA

#### SOpim-18

- Age 65+
- Prescribed any of the following ATC: A03CA02, C04AD03, C04AE01, C04AE02, C04AE04, C04AE54, C04AX01, C04AX07, C04AX10, C04AX17, C04AX20, C04AX21, C05CA05, C05CA07, C05CA51, C05CA54, M03BA02, M03BA03, M03BC01, M03BX01, M03BX02, M03BX07, M03BX08, N02AB02, N03AE01, N04AA01, N04AA02, N04AA12, N04AC01, N04BB01, N04BC08, N05AA01, N05AA02, N05AA04, N05BA05, N05AB02, N05AB03, N05AB04, N05AC01, N05AC02, N05AD01, N05AD08, N05AE03, N05AF05, N05AG02, N05AH02, N05AH03, N05BA01, N05BA02, N05BA03, N05BA04, N05BA05, N05BA06, N05BA08, N05BA09, N05BA11, N05BA12, N05BA13, N05BA16, N05BA18, N05BA21, N05CD01, N05CD02, N05CD03, N05CD04, N05CD05, N05CD06, N05CD07, N05CD08, N05CD09, N05CD10, N05CD11, N05CF01, N05CF02, N05CF03, N06AA01, N06AA02, N06AA04, N06AA06, N06AA09, N06AA10, N06AA12, N06AA21, N06AB05, N06AB08, N06AX16, N06DX02

#### SOpim-19

- Diagnosed with any of the following ICD-10: G20-23
- Prescribed any of the following ATC: A03CA02, C04AD03, C04AE01, C04AE02, C04AE04, C04AE54, C04AX01, C04AX07, C04AX10, C04AX17, C04AX20, C04AX21, C05CA05, C05CA07, C05CA51, C05CA54, M03BA02, M03BA03, M03BC01, M03BX01, M03BX02, M03BX07, M03BX08, N02AB02, N03AE01, N04AA01, N04AA02, N04AA12, N04AC01, N04BB01, N04BC08, N05AA01, N05AA02, N05AA04, N05BA05, N05AB02, N05AB03, N05AB04, N05AC01, N05AC02, N05AD01, N05AD08, N05AE03, N05AF05, N05AG02, N05AH02, N05AH03, N05BA01, N05BA02, N05BA03, N05BA04, N05BA05, N05BA06, N05BA08, N05BA09, N05BA11, N05BA12, N05BA13, N05BA16, N05BA18, N05BA21, N05CD01, N05CD02, N05CD03, N05CD04, N05CD05, N05CD06, N05CD07, N05CD08, N05CD09, N05CD10, N05CD11, N05CF01, N05CF02, N05CF03, N06AA01, N06AA02, N06AA04, N06AA06, N06AA09, N06AA10, N06AA12, N06AA21, N06AB05, N06AB08, N06AX16, N06DX02

#### SOUm-1

- Diagnosed with ICD-10 I48
- Not prescribed any of the following ATC: B01AA, B01AE, B01AF

#### SOUm-2

- Diagnosed with any of the following ICD-10: I20-I22, I24-25, I63-66, I69, I70-72, I74

- 1  
2  
3  
4  
5
- Not prescribed any of the following ATC: B01AC04, B01AC06, B01AC22, B01AC24, B01AC34, B01AC36

6  
7

#### SOum-3

- 8  
9  
10
- Diagnosed with any of the following ICD-10: I20-25
  - Not prescribed ATC C07

11  
12

#### SOum-4

- 13  
14  
15
- Prescribed any of the following ATC: L01BA01, L04AX03, M01CX01
  - Not prescribed ATC B03BB

16  
17

#### SOum-5

- 18  
19  
20  
21
- Prescribed ATC N02A (except N02AA55 and N02AX51)
  - Not prescribed any of the following ATC: A06AB, A06AD, A06AH

22  
23

#### SOum-6

- 24  
25  
26
- Diagnosed with any of the following ICD-10: I20-25, I50
  - Not prescribed ATC C09 (except C09X)

27  
28

#### SOum-7

- 29  
30  
31  
32  
33
- Diagnosed with ICD-10 I50
  - Not prescribed any of the following ATC: C07AB02, C07AB07, C07AB12, C07AG02, C07BB02, C07BB07, C07BB12, C07BB22, C07BB27, C07BB52, C07BG02, C07CB02, C07CB22, C07FB02, C07FB07, C07FB12, C07FB13, C07FB22, C07FX03, C07FX04, C07FX05, C07FX06

34  
35

#### SOum-8

- 36  
37  
38
- Diagnosed with any of the following ICD-10: J44-45
  - Not prescribed any of the following ATC: R03AC, R03AK, R03AL, R03BB

39  
40

#### SOum-9

- 41  
42  
43  
44
- Diagnosed with any of the following ICD-10: J44-45
  - Not prescribed any of the following ATC: R03AK (except R03AK01, R03AK02, R03AK03, R03AK04 and R03AK05), R03AL08, R03AL09, R03BA

45  
46

#### SOum-10

- 47  
48  
49  
50  
51  
52  
53  
54  
55  
56  
57  
58  
59  
60
- Diagnosed with any of the following ICD-10: E10-11, E14
  - Not prescribed ATC C09 (except C09X)

# BMJ Open

## Effectiveness of the application of an electronic medication management support system in patients with polypharmacy in general practice: a study protocol of cluster-randomised controlled trial (AdAM).

|                               |                                                                                                                                                                                                                                                                                                                                                                                                                                                                                                                                                                                                                                                                                                                                                                                                                                                                                                                                                                                                                                                                                                                                                                                                                                                                                                                                                                                                                                                                                                                                                                                                                                                                                                                                                                                                                                                                                                                                                                                                                                                                                                                                                                    |
|-------------------------------|--------------------------------------------------------------------------------------------------------------------------------------------------------------------------------------------------------------------------------------------------------------------------------------------------------------------------------------------------------------------------------------------------------------------------------------------------------------------------------------------------------------------------------------------------------------------------------------------------------------------------------------------------------------------------------------------------------------------------------------------------------------------------------------------------------------------------------------------------------------------------------------------------------------------------------------------------------------------------------------------------------------------------------------------------------------------------------------------------------------------------------------------------------------------------------------------------------------------------------------------------------------------------------------------------------------------------------------------------------------------------------------------------------------------------------------------------------------------------------------------------------------------------------------------------------------------------------------------------------------------------------------------------------------------------------------------------------------------------------------------------------------------------------------------------------------------------------------------------------------------------------------------------------------------------------------------------------------------------------------------------------------------------------------------------------------------------------------------------------------------------------------------------------------------|
| Journal:                      | <i>BMJ Open</i>                                                                                                                                                                                                                                                                                                                                                                                                                                                                                                                                                                                                                                                                                                                                                                                                                                                                                                                                                                                                                                                                                                                                                                                                                                                                                                                                                                                                                                                                                                                                                                                                                                                                                                                                                                                                                                                                                                                                                                                                                                                                                                                                                    |
| Manuscript ID                 | bmjopen-2020-048191.R1                                                                                                                                                                                                                                                                                                                                                                                                                                                                                                                                                                                                                                                                                                                                                                                                                                                                                                                                                                                                                                                                                                                                                                                                                                                                                                                                                                                                                                                                                                                                                                                                                                                                                                                                                                                                                                                                                                                                                                                                                                                                                                                                             |
| Article Type:                 | Protocol                                                                                                                                                                                                                                                                                                                                                                                                                                                                                                                                                                                                                                                                                                                                                                                                                                                                                                                                                                                                                                                                                                                                                                                                                                                                                                                                                                                                                                                                                                                                                                                                                                                                                                                                                                                                                                                                                                                                                                                                                                                                                                                                                           |
| Date Submitted by the Author: | 12-Jul-2021                                                                                                                                                                                                                                                                                                                                                                                                                                                                                                                                                                                                                                                                                                                                                                                                                                                                                                                                                                                                                                                                                                                                                                                                                                                                                                                                                                                                                                                                                                                                                                                                                                                                                                                                                                                                                                                                                                                                                                                                                                                                                                                                                        |
| Complete List of Authors:     | <p>Müller, Beate; Goethe University Frankfurt, Institute of General Practice<br/> Klaaßen-Mielke, Renate; Ruhr University, Department of Medical Informatics, Biometry and Epidemiology<br/> GONZALEZ-GONZALEZ, ANA; Goethe University Frankfurt, Institute of General Practice; Red de Investigación en Servicios de Salud en Enfermedades Crónicas (REDISSEC)<br/> Grandt, Daniel ; Clinic Saarbrücken, Department of Internal Medicine<br/> Hammerschmidt, Reinhard; Association of Statutory Health Insurance Physicians, region Westphalia/Lippe<br/> Köberlein-Neu, Juliane; University of Wuppertal, Center for Health Economics and Health Services Research<br/> Kellermann-Mühlhoff, Petra; BARMER<br/> Trampisch, Hans; Ruhr-University Bochum, Department of Medical Informatics, Biometry and Epidemiology<br/> Beckmann, Till; BARMER<br/> Düvel, Lara; BARMER<br/> Surmann, Bastian; Bielefeld University, Department of Health Economics and Health Care Management. Faculty of Health Science.<br/> Flaig, Benno; Goethe University Frankfurt, Institute of General Practice<br/> Ihle, Peter; University of Cologne, PMV Research Group, Faculty of Medicine and University Hospital Cologne<br/> Söling, Sara; University of Cologne, Institute for Medical Sociology, Health Services Research and Rehabilitation Science, Department of Health Services Research.<br/> Grandt, Simone; RpDoc Solutions GmbH<br/> Dinh, Truc; Goethe University Frankfurt, Institute of General Practice<br/> Piotrowski, Alexandra; University of Wuppertal, Center for Health Economics and Health Services Research.<br/> Meyer, Ingo; University of Cologne, PMV Research Group, Faculty of Medicine and University Hospital Cologne<br/> Karbach, Ute; Technical University Dortmund, Department of Rehabilitation Sociology, Faculty of Rehabilitation Sciences<br/> Harder, Sebastian; Goethe University Frankfurt, Institute for Clinical Pharmacology<br/> Perera, Rafael; University of Oxford, Nuffield Department of Primary Care Health Sciences<br/> Glasziou, Paul; Bond University, Centre for Research in Evidence-Based Practice (CREBP)</p> |

|                                  |                                                                                                                                                                                                                                                                                                                                                                                                                                                                                                                                                                                                                                                                                                                          |
|----------------------------------|--------------------------------------------------------------------------------------------------------------------------------------------------------------------------------------------------------------------------------------------------------------------------------------------------------------------------------------------------------------------------------------------------------------------------------------------------------------------------------------------------------------------------------------------------------------------------------------------------------------------------------------------------------------------------------------------------------------------------|
|                                  | Pfaff, Holger; University of Cologne, Faculty of Human Sciences & Faculty of Medicine and University Hospital Cologne, Institute of Medical Sociology, Health Services Research, and Rehabilitation Science<br>Greiner, Wolfgang; Bielefeld University, Department of Health Economics and Health Care Management. Faculty of Health Science.<br>Gerlach, Ferdinand; Goethe University Frankfurt, Institute of General Practice<br>Timmesfeld, Nina; Ruhr University Bochum, Department of Medical Informatics, Biometry and Epidemiology<br>Muth, Christiane; Bielefeld University, Department of General Practice and Family Medicine, Medical Faculty OWL; Goethe University Frankfurt, Institute of General Practice |
| <b>Primary Subject Heading</b> : | General practice / Family practice                                                                                                                                                                                                                                                                                                                                                                                                                                                                                                                                                                                                                                                                                       |
| Secondary Subject Heading:       | Patient-centred medicine, Pharmacology and therapeutics, Research methods                                                                                                                                                                                                                                                                                                                                                                                                                                                                                                                                                                                                                                                |
| Keywords:                        | GENERAL MEDICINE (see Internal Medicine), Health & safety < HEALTH SERVICES ADMINISTRATION & MANAGEMENT, Change management < HEALTH SERVICES ADMINISTRATION & MANAGEMENT                                                                                                                                                                                                                                                                                                                                                                                                                                                                                                                                                 |
|                                  |                                                                                                                                                                                                                                                                                                                                                                                                                                                                                                                                                                                                                                                                                                                          |

SCHOLARONE™  
Manuscripts





I, the Submitting Author has the right to grant and does grant on behalf of all authors of the Work (as defined in the below author licence), an exclusive licence and/or a non-exclusive licence for contributions from authors who are: i) UK Crown employees; ii) where BMJ has agreed a CC-BY licence shall apply, and/or iii) in accordance with the terms applicable for US Federal Government officers or employees acting as part of their official duties; on a worldwide, perpetual, irrevocable, royalty-free basis to BMJ Publishing Group Ltd ("BMJ") its licensees and where the relevant Journal is co-owned by BMJ to the co-owners of the Journal, to publish the Work in this journal and any other BMJ products and to exploit all rights, as set out in our [licence](#).

The Submitting Author accepts and understands that any supply made under these terms is made by BMJ to the Submitting Author unless you are acting as an employee on behalf of your employer or a postgraduate student of an affiliated institution which is paying any applicable article publishing charge ("APC") for Open Access articles. Where the Submitting Author wishes to make the Work available on an Open Access basis (and intends to pay the relevant APC), the terms of reuse of such Open Access shall be governed by a Creative Commons licence – details of these licences and which [Creative Commons](#) licence will apply to this Work are set out in our licence referred to above.

Other than as permitted in any relevant BMJ Author's Self Archiving Policies, I confirm this Work has not been accepted for publication elsewhere, is not being considered for publication elsewhere and does not duplicate material already published. I confirm all authors consent to publication of this Work and authorise the granting of this licence.

1  
2  
3 **1 TITLE**

4  
5 2 Effectiveness of the application of an electronic medication management support system in  
6  
7 3 patients with polypharmacy in general practice: a study protocol of cluster-randomised  
8  
9 4 controlled trial (AdAM).  
10  
11

12 5  
13  
14 **6 AUTHORS**

15  
16 7 Beate S. Müller\*

17  
18 8 Institute of General Practice. Goethe University Frankfurt. Theodor-Stern-Kai 7. 60590  
19  
20 9 Frankfurt am Main. GERMANY.

21  
22 10 Email: [b.mueller@allgemeinmedizin.uni-frankfurt.de](mailto:b.mueller@allgemeinmedizin.uni-frankfurt.de)  
23  
24  
25

26  
27 11  
28 12 Renate Klaassen-Mielke\*

29  
30 13 Department of Medical Informatics, Biometry and Epidemiology. Ruhr University.  
31  
32 14 Universitätsstrasse 105, 44780 Bochum. GERMANY.

33  
34 15 Email: [Klaassen-Mielke@amib.ruhr-uni-bochum.de](mailto:Klaassen-Mielke@amib.ruhr-uni-bochum.de)  
35  
36

37  
38 16  
39 17 Ana I. González-González

40  
41 18 Institute of General Practice. Goethe University Frankfurt. Theodor-Stern-Kai 7. 60590  
42  
43 19 Frankfurt am Main. GERMANY.

44  
45 20 Red de Investigación en Servicios de Salud en Enfermedades Crónicas (REDISSEC), Madrid,  
46  
47 21 SPAIN.

48  
49 22 Email: [gonzalezgonzalez@allgemeinmedizin.uni-frankfurt.de](mailto:gonzalezgonzalez@allgemeinmedizin.uni-frankfurt.de)  
50  
51

52  
53 23  
54 24 Daniel Grandt

55  
56 25 Department of Internal Medicine. Clinic Saarbrücken. Winterberg 1, 66119 Saarbrücken.  
57  
58 26 GERMANY.  
59  
60

1  
2  
3 27 Email: [danielgrandt@aol.com](mailto:danielgrandt@aol.com)  
4

5 28  
6

7 29 Reinhard Hammerschmidt  
8

9 30 Association of Statutory Health Insurance Physicians, region Westphalia/Lippe. Robert-  
10

11 31 Schimrigk-Str. 4-6, 44141 Dortmund. GERMANY.  
12

13 32 Email: [reinhard.hammerschmidt@kvwl.de](mailto:reinhard.hammerschmidt@kvwl.de)  
14

15 33  
16

17 34 Juliane Köberlein-Neu  
18

19 35 Center for Health Economics and Health Services Research. University of Wuppertal. Rainer-  
20

21 36 Gruenter-Str. 21, 42119 Wuppertal. GERMANY.  
22

23 37 Email: [koeberlein@wiwi.uni-wuppertal.de](mailto:koeberlein@wiwi.uni-wuppertal.de)  
24

25 38  
26

27 39 Petra Kellermann-Mühlhoff  
28

29 40 BARMER. Lichtscheider Str. 89, 42285 Wuppertal. GERMANY.  
30

31 41 Email: [petra.kellermann-muehlhoff@barmer.de](mailto:petra.kellermann-muehlhoff@barmer.de)  
32

33 42  
34

35 43 Hans-Joachim Trampisch  
36

37 44 Department of Medical Informatics, Biometry and Epidemiology. Ruhr University.  
38

39 45 Universitätsstrasse 105, 44780 Bochum. GERMANY.  
40

41 46 Email: [trampisch@amib.ruhr-uni-bochum.de](mailto:trampisch@amib.ruhr-uni-bochum.de)  
42

43 47  
44

45 48 Till Beckmann  
46

47 49 BARMER. Lichtscheider Str. 89, 42285 Wuppertal. GERMANY.  
48

49 50 Email: [till.beckmann@barmer.de](mailto:till.beckmann@barmer.de)  
50

51 51  
52

53 52 Lara Düvel  
54  
55  
56  
57  
58  
59  
60

- 1  
2  
3 53 BARMER. Lichtscheider Str. 89, 42285 Wuppertal. GERMANY.  
4  
5 54 Email: [lara.duevel@barmer.de](mailto:lara.duevel@barmer.de)  
6  
7 55  
8  
9 56 Bastian Surmann  
10  
11 57 Department of Health Economics and Health Care Management. Faculty of Health Science.  
12  
13 58 Bielefeld University. Universitätsstrasse 25, 33615 Bielefeld. GERMANY.  
14  
15 59 Email: [bastian.surmann@uni-bielefeld.de](mailto:bastian.surmann@uni-bielefeld.de)  
16  
17 60  
18  
19 61 Benno Flaig  
20  
21 62 Institute of General Practice. Goethe University Frankfurt. Theodor-Stern-Kai 7. 60590  
22  
23 63 Frankfurt am Main. GERMANY.  
24  
25 64 Email: [flaig@posteo.de](mailto:flaig@posteo.de)  
26  
27 65  
28  
29 66 Peter Ihle  
30  
31 67 PMV Research Group, Faculty of Medicine and University Hospital Cologne, University of  
32  
33 68 Cologne. Herderstrasse 52, 50931 Cologne. GERMANY.  
34  
35 69 Email: [peter.ihle@uk-koeln.de](mailto:peter.ihle@uk-koeln.de)  
36  
37 70  
38  
39 71 Sara Söling  
40  
41 72 Institute for Medical Sociology, Health Services Research and Rehabilitation Science,  
42  
43 73 Department of Health Services Research, University of Cologne. Eupener Str. 129, 50933  
44  
45 74 Cologne. GERMANY.  
46  
47 75 Email: [sara.soeling@uk-koeln.de](mailto:sara.soeling@uk-koeln.de)  
48  
49 76  
50  
51 77 Simone Grandt  
52  
53 78 RpDoc Solutions GmbH. GERMANY  
54  
55  
56  
57  
58  
59  
60

1  
2  
3 79 Email: s.grandt@rpdoc.de  
4

5 80  
6

7 81 Truc S. Dinh  
8

9 82 Institute of General Practice. Goethe University Frankfurt. Theodor-Stern-Kai 7. 60590  
10

11 83 Frankfurt am Main. GERMANY.  
12

13 84 Email: dinh@allgemeinmedizin.uni-frankfurt.de  
14

15 85  
16

17 86 Alexandra Piotrowski  
18

19 87 Center for Health Economics and Health Services Research. University of Wuppertal. Rainer-  
20

21 88 Gruenter-Str. 21, 42119 Wuppertal. GERMANY.  
22

23 89 Email: piotrowski@wiwi.uni-wuppertal.de  
24

25 90  
26

27 91 Ingo Meyer  
28

29 92 PMV Research Group, Faculty of Medicine and University Hospital Cologne, University of  
30

31 93 Cologne. Herderstrasse 52, 50931 Cologne. GERMANY.  
32

33 94 Email: ingo.meyer@uk-koeln.de  
34

35 95  
36

37 96 Ute Karbach  
38

39 97 Department of Rehabilitation Sociology, Faculty of Rehabilitation Sciences, Technical  
40

41 98 University Dortmund, Emil-Figge-Strasse 50, 44227 Dortmund. GERMANY.  
42

43 99 Email: [ute.karbach@tu-dortmund.de](mailto:ute.karbach@tu-dortmund.de)  
44

45 100  
46

47 101 Sebastian Harder  
48

49 102 Institute for Clinical Pharmacology. Goethe University Frankfurt. Theodor-Stern-Kai 7. 60590  
50

51 103 Frankfurt am Main. GERMANY.  
52

53 104 Email: harder@em.uni-frankfurt.de  
54

- 1  
2  
3 105  
4  
5 106 Rafael Perera  
6  
7 107 Nuffield Department of Primary Care Health Sciences. University of Oxford. Radcliffe  
8  
9 108 Observatory Quarter. Woodstock Road, Oxford. OX2 6GG, UK.  
10  
11  
12 109 Email: [Rafael.perera@phc.ox.ac.uk](mailto:Rafael.perera@phc.ox.ac.uk)  
13  
14 110  
15  
16 111 Paul P. Glasziou  
17  
18 112 Centre for Research in Evidence-Based Practice (CREBP). Bond University. Robina QLD 4229,  
19  
20 113 AUSTRALIA.  
21  
22 114 Email: [pglaszio@bond.edu.au](mailto:pglaszio@bond.edu.au)  
23  
24 115  
25  
26 116 Holger Pfaff  
27  
28 117 University of Cologne, Faculty of Human Sciences & Faculty of Medicine and University  
29  
30 118 Hospital Cologne, Institute of Medical Sociology, Health Services Research, and Rehabilitation  
31  
32 119 Science. Eupener Str. 129, 50933 Cologne. GERMANY.  
33  
34 120 Email: [holger.pfaff@uk-koeln.de](mailto:holger.pfaff@uk-koeln.de)  
35  
36 121  
37  
38 122 Wolfgang Greiner  
39  
40 123 Department of Health Economics and Health Care Management. Faculty of Health Science.  
41  
42 124 Bielefeld University. Universitätsstrasse 25, 33615 Bielefeld. GERMANY.  
43  
44 125 Email: [wolfgang.greiner@uni-bielefeld.de](mailto:wolfgang.greiner@uni-bielefeld.de)  
45  
46 126  
47  
48 127 Ferdinand M. Gerlach  
49  
50 128 Institute of General Practice. Goethe University Frankfurt. Theodor-Stern-Kai 7. 60590  
51  
52 129 Frankfurt am Main. GERMANY.  
53  
54 130 Email: [gerlach@allgemeinmedizin.uni-frankfurt.de](mailto:gerlach@allgemeinmedizin.uni-frankfurt.de)  
55  
56  
57  
58  
59  
60

1  
2  
3 131

4  
5 132 Nina Timmesfeld\*\*

6  
7 133 Department of Medical Informatics, Biometry and Epidemiology. Ruhr University.

8  
9 134 Universitätsstrasse 105, 44780 Bochum. GERMANY.

10  
11 135 Email: [timmesfeld@amib.ruhr-uni-bochum.de](mailto:timmesfeld@amib.ruhr-uni-bochum.de)

12  
13  
14 136

15  
16 137 Christiane Muth\*\*

17  
18 138 Department of General Practice and Family Medicine, Medical Faculty OWL, Bielefeld

19  
20 139 University. Universitätsstr. 25, 33615 Bielefeld. GERMANY.

21  
22 140 Email: [christiane.muth@uni-bielefeld.de](mailto:christiane.muth@uni-bielefeld.de)

23  
24 141 Institute of General Practice. Goethe University Frankfurt. Theodor-Stern-Kai 7, 60590

25  
26 142 Frankfurt am Main. GERMANY.

27  
28 143 Email: [muth@allgemeinmedizin.uni-frankfurt.de](mailto:muth@allgemeinmedizin.uni-frankfurt.de)

29  
30  
31 144

32  
33 145 & AdAM Study Group

34  
35  
36 146

37  
38 147 \*Shared first authorship

39  
40 148 \*\*Shared last authorship

41  
42  
43 149

44  
45 150 **CORRESPONDING AUTHOR**

46  
47 151 González-González, Ana Isabel

48  
49 152 Institute of General Practice. Goethe University. Theodor-Stern-Kai 7. 60590 Frankfurt am

50  
51 153 Main. GERMANY.

52  
53 154 Email: [gonzalezgonzalez@allgemeinmedizin.uni-frankfurt.de](mailto:gonzalezgonzalez@allgemeinmedizin.uni-frankfurt.de)

155 **ABSTRACT**

156 **Introduction:** Clinically complex patients often require multiple medications. Polypharmacy is  
157 associated with inappropriate prescriptions which may lead to negative outcomes. Few  
158 effective tools are available to help physicians optimise patient medication. This study assesses  
159 whether an electronic medication management support system (eMMa®) reduces  
160 hospitalisation and mortality and improves prescription quality/safety in patients with  
161 polypharmacy.

162 **Methods and analysis:** Planned design: Pragmatic, parallel cluster-randomised controlled trial;  
163 general practices as randomisation unit; patients as analysis unit. As practice recruitment was  
164 poor, we included additional data to our primary endpoint analysis for practices and quarters  
165 from 10/2017 to 3/2021. Since randomisation was performed in waves, final study design  
166 corresponds to a stepped-wedge design with open-cohort and step-length of one quarter.

167 **Scope:** General practices, Westphalia-Lippe (Germany), caring for BARMER health-fund  
168 covered patients. **Population:** Patients ( $\geq 18$  years) with polypharmacy ( $\geq 5$  prescriptions).  
169 **Sample size:** Initially, 32 patients from each of 539 practices were required for each study arm  
170 (17,200 patients/arm), but only 688 practices were randomised after two-year recruitment.

171 **Design change** ensures 80% power is nonetheless achieved. **Intervention:** Complex  
172 intervention eMMa®. **Follow-up:** At least five quarters/cluster (practice). **Recruitment:**  
173 Practices recruited/randomised at different times; after follow-up, control-group practices  
174 may access eMMa®. **Outcomes:** Primary endpoint is all-cause mortality and hospitalisation;  
175 secondary endpoints are number of potentially inappropriate medications, cause-specific  
176 hospitalisation preceded by high-risk prescribing, and medication underuse. **Statistical analysis:**  
177 Primary and secondary outcomes are measured quarterly at patient level. A generalised linear  
178 mixed-effect model and repeated patient measurements are used to consider patient clusters  
179 within practices. Time and intervention group are considered fixed factors; variation between



1  
2  
3 180 practices and patients is fitted as random effects. Intention-to-treat principle is used to analyse  
4  
5 181 primary and key secondary endpoints.  
6

7 182 **Ethics and dissemination:** Trial approved by Ethics Commission of North-Rhine Medical  
8  
9 183 Association. Results will be disseminated through workshops, peer-reviewed publications, local  
10  
11 184 and international conferences.  
12

13  
14 185 **Registration:** ClinicalTrials.gov, NCT03430336. Registered on February 6, 2018. Last updates in  
15  
16 186 2019 (June 25, 2019), 2020 (July 4, 2020) and 2021 (June 5, 2021), waiting for approval.  
17  
18 187 <https://clinicaltrials.gov/ct2/show/NCT03430336>  
19  
20  
21  
22  
23  
24  
25  
26  
27  
28  
29  
30  
31  
32  
33  
34  
35  
36  
37  
38  
39  
40  
41  
42  
43  
44  
45  
46  
47  
48  
49  
50  
51  
52  
53  
54  
55  
56  
57  
58  
59  
60

1  
2  
3 **188 Strengths and limitations of this study**  
4

- 5 189 - We will provide evidence of the effectiveness of an electronic medication management  
6  
7 190 support system in reducing mortality and hospitalization in adult patients with  
8  
9 191 polypharmacy in real-life general practice.  
10  
11  
12 192 - The intervention concept is innovative, as it is the first time that information based on  
13  
14 193 claims data is made available to general practitioners (in Germany) in the form of an  
15  
16 194 electronic tool.  
17  
18 195 - However, claims-based outcome measures also have disadvantages, as data are collected  
19  
20 196 for the purpose of reimbursement, which limits the choice of outcomes.  
21  
22  
23 197 - A stepped-wedge cluster-randomised design with an open cohort will allow us to  
24  
25 198 overcome insufficient recruitment.  
26  
27 199 - We included a time variable to adjust for confounding time effects and overcome such  
28  
29 200 methodological shortcomings of stepped-wedge design.  
30  
31  
32  
33  
34  
35  
36  
37  
38  
39  
40  
41  
42  
43  
44  
45  
46  
47  
48  
49  
50  
51  
52  
53  
54  
55  
56  
57  
58  
59  
60

1  
2  
3 201 **INTRODUCTION**  
4

5 202 Multiple medications are often required to manage clinically complex patients. Clinicians are  
6  
7 203 frequently challenged by the need to ensure that treatment of complex patients adheres to  
8  
9 204 disease-specific clinical practice guidelines.

10  
11 205 Polypharmacy, defined as the use of five or more medications (1), increases the potential for  
12  
13 206 the prescription of potentially inappropriate medications (PIMs) due to the non-consideration  
14  
15 207 of drug-drug or drug-disease interactions, inappropriate dosages (perhaps due to the age of  
16  
17 208 the patient), as well as unintended duplicate prescriptions (2–6). The use of greater numbers  
18  
19 209 of drug therapies has been associated with increased risk of adverse drug reactions (ADR) (7)  
20  
21 210 irrespective of age (8). It has also been associated with increased risk of hospital admissions  
22  
23 211 (9–11), hip fractures in older adults (12), and higher costs and mortality (10,11,13).

24  
25 212 In line with the increasing number and complexity of medications, polypharmacy is associated  
26  
27 213 with reduced medication adherence in patients. It may also result in under-treatment,  
28  
29 214 particularly in the elderly, in whom too few prescriptions and excessively low dosages have  
30  
31 215 been reported (14–16).

32  
33 216 Medication errors and omissions are important problems facing routine care in general  
34  
35 217 practice, especially in patients with multimorbidity and multiple prescriptions (17–19). They  
36  
37 218 may contribute to patient hospital admissions and mortality, thus additional understanding of  
38  
39 219 such incidents is required (20). As most medication errors and omissions are preventable,  
40  
41 220 raising physicians' awareness of polypharmacy may help to ensure the safe, effective and  
42  
43 221 appropriate use of medication (19,21,22).

44  
45 222 Medication management strategies allow patients and families to actively participate with  
46  
47 223 their physicians in developing complete and accurate medication lists. To ensure patients  
48  
49 224 receive high-quality healthcare, physicians should be provided with tools that help them avoid  
50  
51 225 risks in the treatment of their patients (22–24). Likewise, physicians should have access to  
52  
53 226 continuously available data on quality-oriented aspects to support the control of their  
54  
55  
56  
57  
58  
59  
60

1  
2  
3 227 patients' treatments (24). Few effective instruments are available to help physicians  
4  
5 228 systematically monitor and optimise the medications their patients take (22). Such tools  
6  
7 229 comprise computerised Decision Support Systems (CDSS) or complex multi-faceted  
8  
9 230 pharmaceutical-care based approaches that may incorporate CDSS as part of the intervention.  
10  
11 231 CDSS are computer-based systems providing "passive and active referential information as  
12  
13 232 well as reminders, alerts, and guidelines" (25). A recent systematic review (26) concluded that  
14  
15 233 although CDSS may reduce PIMs, additional randomised controlled trials are needed to assess  
16  
17 234 their impact on patient-relevant outcomes and to evaluate the use of medication targets such  
18  
19 235 as the Screening Tool of Older People's Prescriptions (STOPP) and the Screening Tool to Alert  
20  
21 236 doctors to the Right Treatment (START) criteria (27).  
22  
23 237 Considering that individual, patient-related information relevant for the drug therapy is  
24  
25 238 currently unavailable to physicians and that there is a lack of instruments helping physicians to  
26  
27 239 regularly review their patients' medication, an intervention with a web-based medication  
28  
29 240 management system was developed within the AdAM [Anwendung für digital unterstütztes  
30  
31 241 Arzneimitteltherapie-Management] project. The primary objective of the AdAM trial is  
32  
33 242 therefore to assess whether such electronic medication management support system  
34  
35 243 (complex intervention) reduces the combined endpoint of all-cause mortality and all-cause  
36  
37 244 hospital admissions in patients with polypharmacy, compared to usual care and in the real  
38  
39 245 context of a general practice setting. Sub-studies to be performed will include cost-  
40  
41 246 effectiveness analysis, the analysis of barriers and facilitators through interviews and focus  
42  
43 247 groups with practitioners and interviews with patients, a trial process evaluation, as well as  
44  
45 248 sustainability analysis and quality cost accounting systems to explore the relationship between  
46  
47 249 organisational context, implementation process and quality of care (Additional file 1).  
48  
49 250 However, as this study protocol focuses on the AdAM intervention, these sub-studies will not  
50  
51 251 be explained in detail in this paper  
52  
53 252 [About here link to Additional file 1: Brief description of AdAM sub-studies]  
54  
55  
56  
57  
58  
59  
60

1  
2  
3 253  
4

5 254 **AIMS**

6  
7 255 The AdAM trial aims to:

- 8  
9  
10 256 1. Evaluate whether the complex intervention reduces the combined outcome of all-cause  
11 257 hospitalisation (including night- and day-only admissions) and all-cause mortality (primary  
12 258 outcome) or any of its components (secondary outcomes) in patients with polypharmacy,  
13 259 compared to usual care.  
14  
15  
16  
17  
18 260 2. Evaluate whether the complex intervention reduces cause-specific hospitalisation  
19 261 preceded by high-risk prescribing in patients with polypharmacy, compared to usual care  
20 262 (secondary outcomes).  
21  
22  
23 263 3. Ascertain whether the complex intervention reduces the number of Potentially  
24 264 Inappropriate Medications (PIMs) and Potential Prescribing Omissions (PPOs) as measured  
25 265 using explicit criteria, in patients with polypharmacy, compared to usual care (outcomes of  
26 266 process of care).  
27  
28  
29  
30 267 4. Assess whether the complex intervention reduces the number of prescribed medications  
31 268 in patients with polypharmacy, compared to usual care (outcomes of process of care).  
32  
33  
34 269 5. Evaluate whether the complex intervention is effective in reducing the combined primary  
35 270 outcome, or any of its components, in subgroups of patients defined according to age (<65  
36 271 versus  $\geq 65$  years), sex, early and late enrolment (patient does or does not fulfil the  
37 272 inclusion criteria from the moment he or she joins the intervention of the associated  
38 273 practice), and main treating physician (General Practitioner – GP - vs. specialised physician  
39 274 or hospital outpatient clinics).  
40  
41  
42  
43  
44  
45  
46  
47  
48  
49  
50  
51

52 275

53  
54 276 **METHODS AND ANALYSIS**

55  
56  
57 277 **Study design**  
58  
59  
60

1  
2  
3 278 The AdAM trial was originally planned as a pragmatic, parallel cluster-randomised controlled  
4  
5 279 trial (cRCT) with 15 months (five quarters) of follow-up per cluster (practice). The general  
6  
7 280 practice was the unit of randomisation and the patient the unit of analysis. Since general  
8  
9 281 practitioners trained in performing the intervention are unable to provide usual care, a  
10  
11 282 clustered design (practices as clusters) was chosen to reduce treatment group contamination.  
12  
13

### 14 283 **Important changes after trial launch**

15  
16 284 When practice recruitment ended in June 2019, it became obvious that the target numbers of  
17  
18 285 practices and patients would not be achieved. Extensive simulations were therefore conducted  
19  
20 286 on the assumptions that the number of eligible patients was the same (39 per practice) in all  
21  
22 287 688 randomized practices, that 60% of potential patients had enrolled and that the event rate  
23  
24 288 in the control group would be constant in all quarters. After completing the simulation we  
25  
26 289 decided to change the design of the trial in such a way that a power of 80% could still be reached.  
27  
28 290 The following changes were made and will be explained in detail in each section of the protocol:  
29  
30 291 i) Primary and secondary outcomes will be measured at regular intervals over 12 quarters, rather  
31  
32 292 than once after five quarters; ii) The statistical analysis will be adapted to take account of the  
33  
34 293 new design.  
35  
36  
37  
38

39 294 All changes were made before data from the study population were analyzed (Figure 1).

40  
41 295 [About here Figure 1 on AdAM study flow chart]  
42  
43  
44 296

### 45 46 297 **Study setting and population**

47  
48 298 The trial is conducted in general practices in Westphalia-Lippe, Germany.

#### 49 299 *Inclusion criteria for trial sites (general practices)*

50  
51 300 All criteria had to be fulfilled:

- 52  
53  
54  
55 301 - General practices provide health services to patients covered by the BARMER statutory  
56  
57 302 health insurance fund (BARMER).  
58  
59  
60

- 1  
2  
3 303 - Physicians work as GPs and have specialised in general practice, internal medicine or in no  
4  
5 304 particular field.  
6  
7 305 - Practices have at least 10 eligible patients.  
8  
9  
10 306 - Practices have access to the Westphalia-Lippe Association of Statutory Health Insurance  
11  
12 307 Physicians (KVWL) website through a secure connection (VPN) that can be used by both  
13  
14 308 general practitioners and other medical staff (practice nurse and health care assistants).  
15  
16 309 - Investigators agree to fulfil the contractual obligations arising from the trial.  
17

18 310 *Inclusion criteria for patients*

19 311 All criteria had to be fulfilled:

- 20  
21  
22  
23 312 - Patients are at least 18 years of age and covered by BARMER.  
24  
25 313 - They have polypharmacy, defined as the regular intake of at least five drugs ( $\geq$  five different  
26  
27 314 Anatomical Therapeutic Chemical - ATC) in at least one quarter of the previous year. Each  
28  
29 315 of the five ATCs has to be prescribed over at least two consecutive quarter in the previous  
30  
31 316 year.

32  
33  
34 317 In order to participate in the intervention, patients had to provide written informed consent  
35  
36 318 (Additional file 2). They also had to be competent to sign the required documents under law  
37  
38 319 and capable of providing written informed consent to participate in the trial voluntarily.

39  
40  
41 320 Patients that were not competent to sign the documents under law and were not capable of  
42  
43 321 providing written informed consent to participate in the trial voluntarily (e.g., because of  
44  
45 322 dementia) could provide written informed consent signed by an informal caregiver.

46  
47 323 *No changes were made to setting and study population after trial launch.*

48  
49 324 [About here link to Additional file 2: Informed consent]

50  
51  
52 325

53  
54 326 **Recruitment and registration**

55  
56 327 *Recruitment and registration of practices*  
57  
58  
59  
60

1  
2  
3 328 The KVWL and the BARMER provided a list of general practices that were eligible to participate  
4  
5 329 in the trial. Of these, the KVWL contacted general practitioners from practices with at least ten  
6  
7 330 eligible patients by postal mail (written invitation). Reminders were later sent by fax. General  
8  
9 331 practitioners that wished to participate had to return a signed investigator's agreement form  
10  
11 332 to the KVWL (either by postal mail or fax).

12  
13  
14 333 Moreover, the trial was announced in journals and local media (press, radio, television), and  
15  
16 334 communicated to local key stakeholders (moderators of quality circles, managers of practice  
17  
18 335 networks, etc.). Local recruitment events were also organised.

19  
20  
21 336 *Recruitment and registration of patients*

22  
23 337 STEP 1: Before randomisation and quarterly during the intervention period, the BARMER  
24  
25 338 identified eligible patients from the participating general practices based on claims data.

26  
27 339 STEP 2: After cluster-randomisation of participating practices, patients in the intervention  
28  
29 340 practices were recruited in three ways:

- 30  
31  
32 341 - Every quarter, general practitioners received a list of eligible patients, as well as written  
33  
34 342 information and informed consent forms for the patients. The general practitioners could  
35  
36 343 therefore invite eligible patients on their lists to participate.
- 37  
38 344 - The BARMER sent written information on the study (information letter and a flyer) to  
39  
40 345 eligible patients from participating intervention practices so that they could actively  
41  
42 346 approach their general practitioners to find out about the study. The aim was to explain  
43  
44 347 the contents of the AdAM project to eligible patients in good time in order to arouse  
45  
46 348 interest and actively assist in enrolment. The BARMER telephone hotline was available to  
47  
48 349 immediately answer any questions the patients had. Additional information on the study  
49  
50 350 was provided on the BARMER website (daily news and FAQ list).
- 51  
52 351 - General practitioners invited patients from their practices that fulfilled the inclusion  
53  
54 352 criteria but had not (yet) been identified as eligible from claims data (e.g., due to a delay of  
55  
56 353 data processing).
- 57  
58  
59  
60



1  
2  
3 354 STEP 3: General practitioners sent patients' written informed consent to the KVWL. The KVWL  
4  
5 355 digitised the consent forms and transmitted them to BARMER for verification of insurance  
6  
7 356 status. When the results were positive, KVWL permitted general practitioners to access the  
8  
9 357 electronic medication management support system (eMMa®) and forwarded the original  
10  
11 358 consent forms to the BARMER for archiving.

12  
13  
14 359 When the follow-up period of the cRCT was over, eligible patients in the control group that  
15  
16 360 were identified in STEP 1 were invited to provide their written informed consent and  
17  
18 361 participate in the intervention. Beginning with STEP 2, the recruitment and registration of  
19  
20 362 control patients followed the same procedure as intervention patients (Figure 1).

21  
22  
23 363 *No changes were made in recruitment and registration after the trial began.*

24  
25 364

#### 26 27 365 **Randomisation and allocation concealment**

28  
29 366 Practices were randomly allocated to the complex intervention or control arm in a ratio of 1:1  
30  
31 367 (Figure 2). Balanced randomisation was performed every month to ensure the treatment  
32  
33 368 groups were of approximately equal size for each quarter. The KVWL provided lists of  
34  
35 369 participating practices to the Department of Medical Informatics, Biometry and Epidemiology  
36  
37 370 (AMIB) at the Ruhr University Bochum, Germany. A study-independent staff member at the  
38  
39 371 AMIB used computer-generated random numbers to generate randomisation lists from the list  
40  
41 372 of participating practices. Randomisation lists were sent to KVWL, which concealed treatment  
42  
43 373 allocation to participating practices. Once a practice was randomised, all eligible patients at  
44  
45 374 the practice were deemed to be intervention or control patients, depending on the arm of the  
46  
47 375 study the practice was allocated to. The first list of eligible patients in the intervention group  
48  
49 376 was made available to participating physicians and the intervention began, after patients had  
50  
51 377 signed the informed consent form. Eligible patients in the control group continued to receive  
52  
53 378 usual care. After signing the informed consent form, eligible patients in the control group were  
54  
55  
56  
57  
58  
59  
60

1  
2  
3 379 invited to participate in the intervention five quarters after the start of the intervention at the  
4  
5 380 other practices from the same randomization wave.

6  
7 381 *No changes were made in randomisation and allocation concealment after the trial began.*

8  
9 382 [About here Figure 2 on AdAM data availability (time flow)]

10  
11  
12 383

13  
14 384 **Blinding**

15  
16 385 Allocation was disclosed to the practices soon after randomisation, and to patients from  
17  
18 386 intervention practices when they were asked to provide their written informed consent.

19  
20 387 Patients in the control group were not aware of the study until the end of their practice's  
21  
22 388 follow-up period of the cRCT.

23  
24 389 Due to the type of intervention, neither general practitioners and their patients nor the AdAM  
25  
26 390 study team were blinded to the treatment allocation.

27  
28 391 *No changes were made in blinding after trial commencement.*

29  
30  
31  
32 392

33  
34 393 **Treatment plan for intervention and control groups**

35  
36 394 *Intervention group*

37  
38  
39 395 Several key elements of the intervention must be put into place in participating general  
40  
41 396 practices:

- 42  
43 397 1. The web-based, user-initiated CDSS eMMA<sup>®</sup> provides the general practitioner with drug-  
44  
45 398 therapy information that is relevant to participating patients with polypharmacy on  
46  
47 399 demand. The information might include data on diagnoses, treatments (also non-  
48  
49 400 pharmacologic, such as physiotherapy) and medical products (e.g., assistive devices). The  
50  
51 401 information is based on claims data gathered from all health care professionals involved in  
52  
53 402 the care of the patient (e.g., specialised ambulatory care physicians, other general  
54  
55 403 practitioners, psychotherapists, as well as data on hospital stays and prescription data  
56  
57  
58  
59  
60

- 1  
2  
3 404 from pharmacies). RpDoc® Solutions GmbH developed eMMA® in collaboration with  
4  
5 405 KVWL.  
6  
7 406 2. General practitioners can add and modify patient data in eMMA® (e.g., remove drugs  
8  
9 407 which the patient no longer takes, add new diagnoses, prescriptions and over the counter  
10  
11 408 (OTC) drugs, and recent laboratory findings about kidney function, etc.) in order to  
12  
13 409 enhance and update relevant information.  
14  
15  
16 410 3. Aided by eMMA®, general practitioners systematically assess the appropriateness of every  
17  
18 411 patient's medication at least once a year. Alerts will draw the GP's attention to possible  
19  
20 412 drug-drug interactions, drug-disease interactions, age-related PIMs, duplicate medications,  
21  
22 413 renal dose adjustments, allergies, as well as general inappropriateness, such as  
23  
24 414 prescriptions associated with Dear Doctor letters (Rote-Hand-Briefe) and QT prolongation  
25  
26 415 (for a detailed description see Additional file 3).  
27  
28  
29 416 4. General practitioners optimise patient medication.  
30  
31 417 5. General practitioners print out the updated medication plan, which includes  
32  
33 418 recommendations on medication use, reasons for prescriptions in lay language, and  
34  
35 419 information on drugs that should be avoided, and hand it out to patients. The plan will also  
36  
37 420 be available in foreign languages for patients that speak poor German.  
38  
39 421 6. eMMA® provides general practitioners with guidance (e.g., recommendations addressing  
40  
41 422 certain types of medication errors and high-risk prescribing that were developed by the  
42  
43 423 German Society for Internal Medicine in collaboration with other scientific medical  
44  
45 424 societies).

49  
50 425 *Intervention training*

- 51  
52 426 General practitioners were invited to attend two kick-off meetings and a decentralised event  
53  
54 427 on polypharmacy with a consulting pharmacist from KVWL.  
55  
56 428 General practitioners and health care assistants also could attend a decentralised software  
57  
58 429 training event with consulting pharmacists and IT support staff.  
59  
60

1  
2  
3 430 The KVWL has made a training video and a FAQ list for participating practices available on the  
4  
5 431 trial access site.

6  
7 432 During practice hours, several telephone hotlines were offered for technical questions (IT  
8  
9 433 support) and to provide on-site support for questions relating to administration, management  
10  
11 434 and use.

12  
13  
14 435 The TIDieR checklist was used to ensure intervention reporting standards were met.

15  
16 436 (Additional file 4)

17  
18 437 *No changes were made to the experimental treatment after the trial commenced.*

19  
20 438 [About here link to Additional file 3 on RpDoc® medical database]

21  
22 439 [About here link to Additional file 4 on the TIDieR]

23  
24 440 *Control group*

25  
26 441 For the duration of the cRCT, patients in the control group continued to receive usual  
27  
28 442 treatment from their general practitioner. Five quarters after the start of the intervention at  
29  
30 443 the other practices from the same randomization wave, control practices could switch to  
31  
32 444 intervention and the patients in these practices had the option to switch to the intervention  
33  
34 445 group on condition that they first provide their written informed consent to receive the  
35  
36 446 intervention.

37  
38 447 *No changes were made concerning the control group, as the switch to the intervention group*  
39  
40 448 *was already planned in order to carry out the sub-study on sustainability (see Additional File 1).*

41  
42 449

43  
44 450 **Outcome assessment**

45  
46 451 *Primary outcome*

47  
48 452 The primary outcome is the combined endpoint of all-cause mortality and all-cause  
49  
50 453 hospitalisation (including night- and day-only admissions) in patients with polypharmacy, as  
51  
52 454 assessed quarterly (Table 1).  
53  
54  
55  
56  
57  
58  
59  
60

**Table 1. Primary outcome measure - Composite primary outcome (CPO) – All-cause mortality and all-cause hospitalisation**

| No.   | Outcome                                                                             |
|-------|-------------------------------------------------------------------------------------|
| CPO-1 | All-cause mortality and all-cause hospitalisation (including emergency admissions). |

455 *Secondary outcomes*

- 456 1. All-cause hospitalisation (quarterly): To evaluate whether the complex intervention  
 457 reduces all-cause hospitalisation (including day- or night-only admissions) (number and  
 458 duration) in patients with polypharmacy (Table 2).

**Table 2. Secondary outcome measures - hospitalisation\* (SOh)**

| No.   | Outcome                    |
|-------|----------------------------|
| SOh-1 | All-cause hospitalisation. |

\* Hospitalisation includes day and night admissions (emergency admissions) combined and separately.

- 459 2. All-cause mortality (quarterly): To assess whether the complex intervention reduces all-  
 460 cause mortality in patients with polypharmacy (Table 3).

**Table 3. Secondary outcome measure – mortality (SOm)**

| No.   | Outcome              |
|-------|----------------------|
| SOm-1 | All-cause mortality. |

- 461 3. Incidence rate of cause-specific hospitalisation preceded by high-risk prescribing  
 462 (quarterly): To evaluate whether the complex intervention reduces cause-specific hospital  
 463 admissions (gastrointestinal bleeding, heart failure, renal failure, fall-related fractures or

464 injuries; including and excluding day-only admissions) preceded by high-risk prescribing in  
 465 patients with polypharmacy (Table 4).

**Table 4. Secondary outcome measures – cause-specific hospital admissions (SOh)**

| No.                                                                      | Outcomes                                                                                                                                                                                                                  |
|--------------------------------------------------------------------------|---------------------------------------------------------------------------------------------------------------------------------------------------------------------------------------------------------------------------|
| Cause-specific hospital admissions preceded by high-risk prescribing     |                                                                                                                                                                                                                           |
| SOh-2                                                                    | Hospital admissions due to GI bleeding or ulcers in patients at risk for medication-related GI disorders (defined in SOPim 1-8 measures) in the 12 weeks before admission (28).                                           |
| SOh-3                                                                    | Hospital admissions due to acute heart failure or acute renal failure in patients at risk for medication-related cardiovascular disorders (defined in SOPim 9-17 measures) in the 12 weeks before admission (28).         |
| SOh-4                                                                    | Hospital admissions due to fall related fractures or injuries in patients who were at risk for medication-related falls (defined in SOPim 18-19 measures) in the 12 weeks before admission.                               |
| Cause-specific hospital admissions not preceded by high risk-prescribing |                                                                                                                                                                                                                           |
| SOh-5                                                                    | Hospital admissions due to GI bleeding or ulcer in patients who were not at risk for medication-related GI disorders (defined in SOPim 1-8 measures) in the 12 weeks before admission.                                    |
| SOh-6                                                                    | Hospital admissions due to acute heart failure or acute renal failure in patients who were not at risk for medication-related cardiovascular disorders (defined in SOPim 9-17 measures) in the 12 weeks before admission. |
| SOh-7                                                                    | Hospital admissions due to fall-related fractures or injuries in patients who were not at risk for medication-related falls (defined in SOPim 18-19 measures) in the 12 weeks before admission.                           |

467 *Secondary outcomes concerning process of care*

- 468 4. Number of PIMs (quarterly): To ascertain whether the complex intervention improves the  
 469 appropriateness of prescriptions in patients with polypharmacy (Table 5 and Table 6).

**Table 5. Secondary outcome measures – PIM-related high-risk prescribing (SOpim)**

| No.                                  | Outcomes                                                                                                                                                                        |
|--------------------------------------|---------------------------------------------------------------------------------------------------------------------------------------------------------------------------------|
| High-risk of GI bleeding             |                                                                                                                                                                                 |
| SOpim-1                              | Patients with a peptic ulcer, GERD, Crohn's disease or gastritis who were prescribed a traditional oral NSAID* without a gastroprotective drug (28,29).                         |
| SOpim - 2                            | Patients aged $\geq 65$ who were prescribed a traditional oral NSAID* without a gastroprotective drug (28).                                                                     |
| SOpim - 3                            | Patients prescribed a platelet aggregation inhibitor excluding heparin and a traditional oral NSAID* without a gastroprotective drug (28,29).                                   |
| SOpim - 4                            | Patients prescribed a fixed combination of aspirin and clopidogrel or aspirin and either clopidogrel, ticagrelor or prasugrel without a gastroprotective drug (28).             |
| SOpim - 5                            | Patients prescribed an oral anticoagulant or a direct thrombin inhibitor or a direct factor Xa inhibitor and a traditional oral NSAID* without a gastroprotective drug (28,29). |
| SOpim - 6                            | Patients prescribed an oral anticoagulant and a platelet aggregation inhibitor excluding heparin without a gastroprotective drug (28,29).                                       |
| SOpim - 7                            | Patients prescribed SSRI or SSNRI with a traditional oral NSAID* without a gastroprotective drug (30,31).                                                                       |
| SOpim - 8                            | Patients prescribed a systemic glucocorticoid with a traditional oral NSAID* without a gastroprotective drug (30).                                                              |
| High-risk cardiovascular prescribing |                                                                                                                                                                                 |
| SOpim - 9                            | Patients prescribed an ACE inhibitor/ARB/renin inhibitor with an oral NSAID* (28,29).                                                                                           |

| No.                                         | Outcomes                                                                                                                                                                                                                                                                                                                   |
|---------------------------------------------|----------------------------------------------------------------------------------------------------------------------------------------------------------------------------------------------------------------------------------------------------------------------------------------------------------------------------|
| SOpim -<br>10                               | Patients prescribed a diuretic with an oral NSAID* (28,29).                                                                                                                                                                                                                                                                |
| SOpim -<br>11                               | Heart failure patients prescribed any oral NSAID* (28,29).                                                                                                                                                                                                                                                                 |
| SOpim -<br>12                               | Heart failure patients prescribed a tricyclic antidepressant (30,32).                                                                                                                                                                                                                                                      |
| SOpim -<br>13                               | Patients prescribed an ACE inhibitor/ARB/renin inhibitor or a potassium-sparing diuretic including aldosterone antagonists with a potassium supplement (29,30,32).                                                                                                                                                         |
| SOpim -<br>14                               | Heart failure patients prescribed a beta-blocking agent, non-selective (32).                                                                                                                                                                                                                                               |
| SOpim -<br>15                               | Patients aged $\geq 65$ prescribed a QTc prolongation drug (33,34).                                                                                                                                                                                                                                                        |
| SOpim -<br>16                               | Patients prescribed two or more QTc prolongation drugs or a QTc prolongation drug with an inhibitor of its isozyme (CYP3A4, CYP2D6) or with known risk factors (heart failure, bradycardia, sick sinus syndrome including tachycardia-bradycardia syndrome, other cardiac arrhythmias including long-QT syndrome) (33,34). |
| SOpim -<br>17                               | Patients prescribed digitalis glycosides with a non-potassium-sparing diuretic and no potassium supplement (29).                                                                                                                                                                                                           |
| High-risk prescribing with regards to falls |                                                                                                                                                                                                                                                                                                                            |
| SOpim -<br>18                               | Patients aged $\geq 65$ prescribed a drug that increases risk of falling (33).                                                                                                                                                                                                                                             |
| SOpim -<br>19a/b                            | Patients with Parkinson's disease or other degenerative diseases of basal ganglia prescribed a drug that increases risk of falling (33).                                                                                                                                                                                   |

High-risk prescribing is related to prescriptions in the previous 12 weeks

\* Information related to NSAID is based on claims data; over-the-counter medications cannot be measured.



**Table 6. Secondary outcome measures – PIM-related high-risk prescribing composite (SOpim)**

| No.                                                  | Outcomes                                                                                                                                                                                                                                                                                                                 |                                            |
|------------------------------------------------------|--------------------------------------------------------------------------------------------------------------------------------------------------------------------------------------------------------------------------------------------------------------------------------------------------------------------------|--------------------------------------------|
| High-risk prescribing composite                      |                                                                                                                                                                                                                                                                                                                          |                                            |
| SOpim -<br>20                                        | Patients with any risk factor and one or more high-risk prescriptions as defined in SOpim measures 1 to 8.                                                                                                                                                                                                               | GI risk composite                          |
| SOpim -<br>21                                        | Patients with any risk factor and one or more high-risk prescriptions as defined in SOpim measures 9 to 17.                                                                                                                                                                                                              | CR risk composite                          |
| SOpim -<br>22                                        | Patients with any risk factor and one or more high-risk prescriptions as defined in SOpim measures 18 to 19.                                                                                                                                                                                                             | Fall risk composite                        |
| SOpim<br>-C                                          | Patients with any risk factor and one or more high-risk prescriptions as defined in SOpim measures 20 to 22.                                                                                                                                                                                                             | High-risk prescription                     |
| Initiation and discontinuation prescription measures |                                                                                                                                                                                                                                                                                                                          |                                            |
| SOpim<br>-Ci                                         | Patients who were not exposed to high-risk prescriptions (as defined in SOpim-C measures) in the 12 weeks previous to the intervention (as defined by date of the intervention invoice) and who received a high-risk prescription (as defined in SOpim-C measures) within 12 weeks of the beginning of the intervention. | Initiation of high-risk prescriptions      |
| SOpim<br>-Cd                                         | Patients who were exposed to a high-risk prescription (as defined in SOpim-C measure) in the 12 weeks previous to the intervention (as defined by date of the intervention invoice) that did not receive a high-risk prescription within 12 weeks of the beginning of the intervention.                                  | Discontinuation of high-risk prescriptions |

- 470 5. Total number of underused medications (quarterly): To assess whether the total number  
 471 of underused medications (based on the modified START criteria) in patients with

472 polypharmacy does not increase in the intervention group in comparison to the control  
 473 group (Table 7).

**Table 7. Secondary outcome measures – underused medication (SOum)**

| No.                  | Outcomes                                                                                                                                                                            |
|----------------------|-------------------------------------------------------------------------------------------------------------------------------------------------------------------------------------|
| Underused medication |                                                                                                                                                                                     |
| SOum-1               | Patients with chronic atrial fibrillation who were not prescribed vitamin K antagonists or direct thrombin inhibitors or direct factor Xa inhibitors in the previous 12 weeks (27). |
| SOum-2               | Patients with coronary, cerebral or peripheral vascular disease who were not prescribed an antiplatelet therapy (aspirin or clopidogrel or prasugrel or ticagrelor) (27).           |
| SOum-3               | Patients with ischemic heart disease that were not prescribed a beta-blocker (27).                                                                                                  |
| SOum-4               | Patients that were prescribed methotrexate without a folic acid supplement in the previous 12 weeks (27).                                                                           |
| SOum-5               | Patients that were receiving opioids regularly without laxatives in the previous 12 weeks (27).                                                                                     |
| SOum-6               | Patients with systolic heart failure and/or documented coronary artery disease that were not prescribed ACE inhibitors or ARB (27).                                                 |
| SOum-7               | Patients with stable systolic heart failure that did not receive appropriate beta-blockers (bisoprolol, nebivolol, metoprolol or carvedilol) (27).                                  |
| SOum-8               | Patients not regularly taking an inhaled $\beta_2$ agonist or antimuscarinic bronchodilator for mild to moderate asthma or COPD (27).                                               |
| SOum-9               | Patients not regularly taking an inhaled corticosteroid for moderate-severe asthma or COPD (27).                                                                                    |

|         |                                                                                                                                                         |
|---------|---------------------------------------------------------------------------------------------------------------------------------------------------------|
| SOum-10 | Diabetes patients with or without serum biochemical renal impairment that did not receive ACE inhibitors or ARB (if intolerant of ACE inhibitors) (27). |
|---------|---------------------------------------------------------------------------------------------------------------------------------------------------------|

ACE inhibitor = Angiotensin-Converting Enzyme inhibitor; ARB = Angiotensin Receptor Blocker

- 474 6. Total number of prescribed medications (quarterly): To assess whether the complex  
 475 intervention reduces the total number of prescribed medications in patients with  
 476 polypharmacy (Table 8).

**Table 8. Secondary outcome measures and process measures – polypharmacy indicators (SOp)**

| No.   | Outcomes                         |
|-------|----------------------------------|
| SOp-1 | No. of prescriptions per patient |

- 477 Testing of these outcomes will be exploratory.
- 478 Data for primary and secondary outcomes will be taken from health insurance claims data  
 479 (BARMER) for the period from the 4<sup>th</sup> quarter 2017 to the 1<sup>st</sup> quarter 2021.
- 480 *Changes made after trial commencement:* Initially, we planned a one-time survey of outcomes  
 481 for a period of five quarters following randomisation. In the end, data on the endpoints was  
 482 collected quarterly for the period from the 4<sup>th</sup> quarter 2017 to the 1<sup>st</sup> quarter 2021.
- 483 See Additional file 5 for more information about the secondary outcome measures.
- 484 [About here link to Additional file 5: Specifications related to the secondary outcome measures]
- 485 *Explanatory variables for population characteristics*
- 486 Patient (first level) variables
- 487 - Sociodemographic patient data. Sex, age, insurance status and reason insurance coverage  
 488 ended (death, change of sickness fund).
- 489 - Outpatient diagnoses and outpatient services. The International Classification of Diseases  
 490 10<sup>th</sup> edition (ICD 10) codes (35) are used for the outpatient diagnoses, which are

- 1  
2  
3 491 documented on a quarterly basis. The services are coded according to the Physician's Fee  
4  
5 492 Scale (Einheitlicher Bewertungsmaßstab = EBM).  
6  
7 493 - Medication. Drugs are identified using their national drug code (pharmaceutical  
8  
9 494 registration number, Pharma-Zentral-Nummer - PZN), which contains all relevant  
10  
11 495 information such as trade name, active chemical ingredient(s), strength, application,  
12  
13 496 dosage and indication. The PZN will be linked to the ATC Classification System, which  
14  
15 497 allows analysis to be based on active ingredients, manufacturer and package size. The  
16  
17 498 duration of the therapy will be assessed by means of the defined daily dose (DDD Index)  
18  
19 499 and included in the reference table. The dataset only includes prescribed medication that  
20  
21 500 is paid for by the insurance fund.  
22  
23 501 - Inpatient data. For each hospitalisation the start and end date, the admission and  
24  
25 502 discharge diagnosis (with date), as well as secondary diagnoses, will be available.  
26  
27 503 Furthermore, operations and treatment procedures are also documented (Operation and  
28  
29 504 Procedure - OPS - Code).  
30  
31 505 - Long-term nursing care (Sozialgesetzbuch - SGB XI). For patients receiving long-term  
32  
33 506 nursing care, the start and end date, the level and place of care, the costs and type of  
34  
35 507 services (cash, non-cash, combined) are documented in the dataset.  
36  
37  
38  
39  
40  
41 508 Practice profile (second level) variables  
42  
43 509 - Single-handed practice / group practice (including ambulatory health care centres, along  
44  
45 510 with the number of physicians).  
46  
47 511 - Work experience (start and end date of practice according to KVWL data).  
48  
49 512 - Practice size: Number of registered patients in most recent quarter.  
50  
51 513 - Participation in a (regional) practice network.  
52  
53 514 General practitioner profile (second level) variables  
54  
55 515 - Age, gender.  
56  
57  
58  
59 516 *No changes were made to explanatory variables.*  
60

1  
2  
3 517

4  
5 518 **Safety monitoring and adverse events**

6  
7 519 Safety and adverse events were not monitored and reported upon, since it was assumed that  
8  
9 520 treatment could not deteriorate as a result of the trial. The study team had no influence on the  
10  
11 521 diagnostic-therapeutic decision-making of general practitioners and their patients, and analysis  
12  
13 522 of the pseudonymous data will be conducted with a significant delay. General practitioners  
14  
15 523 and patients could therefore not be informed of identified medication errors.  
16  
17 524 Unintended consequences of using the e-Health technology such as non-acceptance will be  
18  
19 525 investigated qualitatively (Additional file 1).  
20  
21  
22

23 526

24  
25 527 **Data collection and management**

26  
27 528 *Data collection*

28  
29 529 Information on all eligible patients was taken pseudonymously from BARMER's claims data.  
30  
31 530 Claims data detail billable interactions (insurer claims) between the insured patients and the  
32  
33 531 health care delivery system.

34  
35 532 In the trial, the KVWL data is not systematically linked to BARMER's data on either a  
36  
37 533 practitioner or patient level. The KVWL provides sociodemographic data on general  
38  
39 534 practitioners and practice profiles for both the intervention and control groups.  
40  
41

42  
43 535 *Data management*

44  
45 536 The required claims data for all eligible patients in the region covered by the KVWL will be  
46  
47 537 specified in a coordinated Minimum Data Set (MDS) and prepared by the PMV research group  
48  
49 538 in Cologne.

50  
51 539 The trial data will be archived for 10 years. BARMER will archive a back-up copy containing the  
52  
53 540 data of all study patients (list of eligible patients, declarations of consent to participate in the  
54  
55 541 trial and on data protection, signed and dated by the patients, as well as the data provided for  
56  
57 542 the evaluation) in accordance with European basic data protection regulations. The KVWL will  
58  
59  
60

1  
2  
3 543 archive documents concerning the general practices / general practitioners participating in the  
4  
5 544 trial (e.g., signed investigator`s agreement form). The IGP will archive the trial master file and  
6  
7 545 any related study plans (MDS and statistical analysis plan). The data provided by KVWL and  
8  
9 546 eMMA®, as well as primary data collected in interviews with patients, will be archived by the  
10  
11 547 IGP in accordance with European basic data protection regulations.  
12  
13

14 548 *End of the trial*

15  
16 549 The regular end of the intervention and follow-up period for all patients was March 2021.

17  
18 550 A patient`s participation in the intervention ends prematurely: i) when he or she switches to  
19  
20 551 another insurance company and/or a non-participating practice, or ii) the general practitioner  
21  
22 552 withdraws his or her consent or is no longer licensed to provide health services by the KVWL.  
23  
24

25 553 *Schedule and duration of the trial*

26  
27 554 Practice recruitment: 02.05.2017 to 30.06.2019.

28  
29 555 Intervention period: 15.02.2018 to 31.03.2021.

30  
31 556 Claims data from 01.01.2017 to 31.03.2021 will be used in the analysis. The cohort is open,  
32  
33 557 meaning that patient data are included from the quarter in which the inclusion criteria are  
34  
35 558 met.  
36  
37

38 559 *Quality control and quality assurance*

39  
40 560 The principal investigator and a steering committee (comprising representatives of BARMER,  
41  
42 561 KVWL and the evaluation team) guarantee that all processes in the trial comply with Good  
43  
44 562 Clinical Practice (GCP) guidelines and ethical and legal requirements.  
45  
46

47  
48 563 BARMER and the KVWL are responsible for monitoring the trial and were in particular  
49  
50 564 responsible for the recruitment of practices and patients, randomisation (supported by the  
51  
52 565 AMIB), the implementation of the intervention, and the provision of data to the evaluation  
53  
54 566 team.  
55

56  
57 567 A designated advisory board provides advice on questions concerning planning, conducting,  
58  
59 568 and analysing the trial.  
60

1  
2  
3 569 *Changes to data collection and data management:* Initially, data collection for each practice  
4  
5 570 was to be carried out as a one-time survey to take place after the start of randomisation and  
6  
7 571 over a period of five quarters. In the end, data was collected at regular intervals over 12  
8  
9 572 quarters from the 4th quarter 2017 to the 1st quarter 2021 (light blue and light red areas in  
10  
11 573 Figure 2).

12  
13  
14 574

### 15 575 **Sample size**

16  
17 576 Initially, based on data detailing the incidence of hospitalisation and all-cause mortality in  
18  
19 577 patients with multiple prescriptions, we expected rates of 30% in the control group over a 12-  
20  
21 578 month follow-up period (16,17). Based on a duration of 15 months (five quarters), the rates  
22  
23 579 were assumed to be 35.25% in the control group, with a relative reduction of 5% in the  
24  
25 580 intervention group. Based on 80% recruitment of practices and patients and an intra-cluster  
26  
27 581 correlation coefficient (ICC) of 1%, a sample size of 17,200 cluster-randomised patients per  
28  
29 582 group (539 practices per study arm, about 32 patients per practice) is required to detect an  
30  
31 583 absolute difference in the combined endpoint of 1.8% between intervention and control  
32  
33 584 groups (type 1 error of 5% and type 2 error of 15%).

34  
35 585 *Changes made after trial launch:* At the end of practice recruitment in June 2019, it became  
36  
37 586 clear that the target numbers of practices could not be achieved. In the period from 27.06.2017  
38  
39 587 to 03.07.2019, 688 practices were randomised to the intervention and control groups. Based on  
40  
41 588 the assumptions of 26,832 (688\*39) eligible patients in the randomised practices, a participation  
42  
43 589 rate of 60% of patients in the intervention group, the same number of practices at all changeover  
44  
45 590 times (i.e., the switch from control to intervention group), and a constant event rate in the  
46  
47 591 control group over all quarters, a power of 80% is achievable.

48  
49  
50 592

### 51 593 **Statistical analysis**

52  
53 594 *Population for analysis*

1  
2  
3 595 As both patients that met the inclusion and exclusion criteria from the beginning, and patients  
4  
5 596 that fulfilled the inclusion and exclusion criteria after the trial had commenced were able to  
6  
7 597 receive the intervention, the ITT population was an open cohort. Patients from participating  
8  
9 598 practices therefore started from the time at which inclusion and exclusion criteria were met  
10  
11 599 during a period stretching from the 4<sup>th</sup> quarter 2017 to the end of the 1<sup>st</sup> quarter 2021.

12  
13  
14 600 Following the ITT principle, practices and their patients will be analysed quarterly, according to  
15  
16 601 the group to which the practice was allocated, regardless of whether they refused or  
17  
18 602 discontinued the allocated treatment, or whether there were other deviations from the  
19  
20 603 protocol.

21  
22  
23 604 For the efficacy analysis, only patients that were selected from the intervention group and for  
24  
25 605 whom the general practitioner had performed the intervention will be considered. This  
26  
27 606 subgroup will be compared with patients in the control group that started the intervention after  
28  
29 607 completion of the cRCT-phase. In this population, it will be possible to estimate the maximum  
30  
31 608 possible effect of the intervention, comparable to a per-protocol (PP)-population.

32  
33  
34  
35 609 No changes were made to the population for analysis.

### 36 37 610 *Statistical hypotheses, methods, and analyses*

38  
39  
40 611 The primary objective of this study is to determine whether the complex intervention reduces  
41  
42 612 the combined endpoint of all-cause mortality and all-cause hospitalisation (including night-  
43  
44 613 and day-only admissions) in adult patients with polypharmacy, as compared to usual care.

45  
46 614 Statistically, the study objective is formulated as a test of the null hypothesis  $H_0: p_1 = p_2$  (the  
47  
48 615 two groups do not differ in terms of the quarterly event probability of combined endpoint  $p_i$ ,  
49  
50 616 where  $i=1$  or  $2$  for intervention or control group respectively), compared to the alternative  
51  
52 617 hypothesis  $H_1: p_1 \neq p_2$  (there is a difference between the two groups).

53  
54  
55 618 The analysis is based on quarterly data at a patient level and patients are clustered in  
56  
57 619 practices. We will adjust for the different observation periods and for clustering in the data by  
58  
59  
60



1  
2  
3 620 fitting an appropriate generalised linear mixed model (GLMM). A mixed logistic regression  
4  
5 621 model will therefore be used for all binary outcomes, and especially for the primary endpoint.  
6  
7 622 Time and treatment group, and further confounders such as age, sex, the medCDS prognostic  
8  
9 623 index (36), care level/degree at baseline, days in hospital in the 12 months preceding baseline,  
10  
11 624 are considered to be fixed factors. Since all practices were observed under both control and  
12  
13 625 intervention conditions, it will be necessary to include two correlated random cluster level  
14  
15 626 effects in the model. To gauge the interdependence of individual measurements over the  
16  
17 627 course of the study, additional uncorrelated random effects for patients will also be fitted.  
18  
19 628 In the AdAM trial, we have assumed that the intervention requires an initial period of  
20  
21 629 adjustment before becoming fully embedded. The intervention effect is therefore expected to  
22  
23 630 gradually increase from the time the practice switches to the intervention ( $\frac{1}{4}$  in the quarter of  
24  
25 631 the practice change,  $\frac{1}{2}$  in the quarter after the change to intervention and the full effect  
26  
27 632 thereafter).  
28  
29 633 A similar approach will be used to investigate secondary outcomes, sensitivity and efficacy.  
30  
31 634 The secondary outcomes 2 (all-cause hospitalisation) and 3 (all-cause mortality) are to be  
32  
33 635 analysed hierarchically, reflecting the rationale of the intervention, with a significant decrease  
34  
35 636 in the combined primary endpoint of all-cause mortality and all-cause hospital admissions  
36  
37 637 (level 1) expected to reflect primarily in a decline in all-cause hospitalisation (level 2). If so, all-  
38  
39 638 cause mortality may also decrease (level 3). Therefore, the pre-specified secondary outcomes  
40  
41 639 2 and 3 will be tested in a confirmatory manner. If no significant differences occur at any level,  
42  
43 640 tests of outcomes on higher levels will be exploratory.  
44  
45 641 The baseline characteristics of participating practices, general practitioners and patients will be  
46  
47 642 described according to the initially allocated treatment arm. Categorical data will be presented  
48  
49 643 as frequencies and percentages. Total numbers, mean, standard deviation, median, inter-  
50  
51 644 quartile range (IQR), minimum, and maximum will be provided for continuous data.  
52  
53  
54  
55  
56  
57  
58  
59  
60

1  
2  
3 645 All statistical tests will be two-sided at a significance level of  $\alpha=0.05$ . No interim analysis of  
4  
5 646 efficacy will be performed.  
6  
7 647 *Changes made after trial launch:* We initially planned to use a generalised linear mixed model  
8  
9 648 to evaluate the treatment effect in a randomised parallel group design. In addition to  
10  
11 649 considering the treatment group to be a fixed factor, a random effect to account for clustering  
12  
13 650 patients in practices is necessary. Due to the switch to a stepped wedge design, a more  
14  
15 651 complex model structure was required (see above).  
16  
17  
18  
19  
20

### 21 653 **Patient and public involvement**

22  
23 654 This protocol was developed without patient or public involvement.  
24  
25  
26

### 27 656 **ETHICS AND DISSEMINATION**

28  
29  
30 657 The project is being carried out in accordance with the Medical Association's code of conduct  
31  
32 658 and GCP, and in line with the World Medical Association Declaration of Helsinki (37). The study  
33  
34 659 plans and all patient-related documents have been sent to and approved by the Ethics  
35  
36 660 Commission of the North-Rhine Medical Association (approval date 26.07.2017, approval no.  
37  
38 661 2017184).  
39  
40  
41 662 All changes made and reported here after the trial began have also been sent to and approved  
42  
43 663 by the above-mentioned ethics committee (approval date 03.04.2020, approval no.  
44  
45 664 6000207769).  
46  
47

48 665 The voluntary participation of practitioners in the trial is recorded in writing following their  
49  
50 666 informed decision. Patients were asked for their consent as soon as the practice switched to  
51  
52 667 the intervention. Patients that did not wish to participate continued to receive usual care.  
53  
54 668 Data protection is guaranteed for all patient-related data. Eligible patients were identified  
55  
56 669 using pseudonymous claims data from BARMER, whereby BARMER previously informed the  
57  
58 670 patient of the opportunity to participate in the trial. Before the intervention began, patients  
59  
60

1  
2  
3 671 were separately informed about data protection during the trial and intervention. Patients had  
4  
5 672 to provide their informed consent by signing and dating a declaration.

6  
7 673 This study protocol was prepared in accordance with the extension of the CONSORT 2010  
8  
9 674 statement for reporting on cluster randomised trials (Additional file 6) (38) and the SPIRIT 2013  
10  
11 675 statement for reporting on clinical trial protocols (Additional file 7) (39).

12  
13  
14 676 [About here link to Additional file 6 on CONSORT 2010 checklist of information to include when  
15  
16 677 reporting on a cluster randomised trial]

17  
18 678 [About here link to Additional file 7 on SPIRIT 2013 checklist of information to include when  
19  
20 679 reporting on a clinical trial protocol]

21  
22  
23 680 We will prepare presentations to disseminate the study findings to healthcare stakeholders  
24  
25 681 and patients, and at relevant national and international conferences. We aim to publish the  
26  
27 682 results of the trial in peer-reviewed journals.

28  
29  
30 683

31  
32 684 **REFERENCES**

- 33  
34  
35 685 1. Ferner RE, Aronson JK. Communicating information about drug safety. *BMJ*. 2006 Jul  
36  
37 686 15;333(7559):143–5.
- 38  
39  
40 687 2. Weng M-C, Tsai C-F, Sheu K-L, Lee Y-T, Lee H-C, Tzeng S-L, et al. The impact of number  
41  
42 688 of drugs prescribed on the risk of potentially inappropriate medication among  
43  
44 689 outpatient older adults with chronic diseases. *QJM An Int J Med*. 2013 Nov  
45  
46 690 1;106(11):1009–15.
- 47  
48  
49 691 3. Campbell SE, Seymour DG, Primrose WR, Lynch JE, Dunstan E, Espallargues M, et al. A  
50  
51 692 multi-centre European study of factors affecting the discharge destination of older  
52  
53 693 people admitted to hospital: analysis of in-hospital data from the ACMEplus project.  
54  
55 694 *Age Ageing*. 2005 Sep 1;34(5):467–75.
- 56  
57  
58 695 4. Hanlon JT, Schmader KE, Ruby CM, Weinberger M. Suboptimal Prescribing in Older  
59  
60

- 1  
2  
3 696 Inpatients and Outpatients. *J Am Geriatr Soc*. 2001 Feb;49(2):200–9.  
4  
5  
6 697 5. Thomsen LA, Winterstein AG, Søndergaard B, Haugbølle LS, Melander A. Systematic  
7  
8 698 review of the incidence and characteristics of preventable adverse drug events in  
9  
10 699 ambulatory care. *Ann Pharmacother*. 2007;41(9):1411–26.  
11  
12  
13 700 6. Rodrigues MCS, Oliveira C de. Drug-drug interactions and adverse drug reactions in  
14  
15 701 polypharmacy among older adults: an integrative review. *Rev Lat Am Enfermagem*.  
16  
17 702 2016;24.  
18  
19  
20 703 7. Edwards IR, Aronson JK. Adverse drug reactions: definitions, diagnosis, and  
21  
22 704 management. *Lancet*. 2000 Oct;356(9237):1255–9.  
23  
24  
25 705 8. Field TS, Gurwitz JH, Avorn J, McCormick D, Jain S, Eckler M, et al. Risk Factors for  
26  
27 706 Adverse Drug Events Among Nursing Home Residents. *Arch Intern Med*. 2001 Jul  
28  
29 707 9;161(13):1629.  
30  
31  
32 708 9. Lu W-H, Wen Y-W, Chen L-K, Hsiao F-Y. Effect of polypharmacy, potentially  
33  
34 709 inappropriate medications and anticholinergic burden on clinical outcomes: a  
35  
36 710 retrospective cohort study. *Can Med Assoc J*. 2015 Mar 3;187(4):E130–7.  
37  
38  
39 711 10. Frazier SC. Health Outcomes and Polypharmacy in Elderly Individuals. *J Gerontol Nurs*.  
40  
41 712 2005 Sep 1;31(9):4–9.  
42  
43  
44 713 11. Franchi C, Marcucci M, Mannucci PM, Tettamanti M, Pasina L, Fortino I, et al. Changes  
45  
46 714 in clinical outcomes for community-dwelling older people exposed to incident chronic  
47  
48 715 polypharmacy: a comparison between 2001 and 2009. *Pharmacoepidemiol Drug Saf*.  
49  
50 716 2016 Feb;25(2):204–11.  
51  
52  
53 717 12. Lai S-W, Liao K-F, Liao C-C, Muo C-H, Liu C-S, Sung F-C. Polypharmacy Correlates With  
54  
55 718 Increased Risk for Hip Fracture in the Elderly. *Medicine (Baltimore)*. 2010  
56  
57 719 Sep;89(5):295–9.  
58  
59  
60

- 1  
2  
3 720 13. Sganga F, Landi F, Ruggiero C, Corsonello A, Vetrano DL, Lattanzio F, et al.  
4  
5 721 Polypharmacy and health outcomes among older adults discharged from hospital:  
6  
7 722 Results from the CRIME study. *Geriatr Gerontol Int*. 2015 Feb;15(2):141–6.  
8  
9  
10 723 14. Crooks J. Rational therapeutics in the elderly. *J Chronic Dis*. 1983 Jan;36(1):59–65.  
11  
12  
13 724 15. Vestal RE. Drug Use in the Elderly. *Drugs*. 1978 Oct;16(4):358–82.  
14  
15 725 16. Vestal RE. Aging and pharmacology. *Cancer*. 1997 Oct 1;80(7):1302–10.  
16  
17  
18 726 17. Koper D, Kamenski G, Flamm M, Böhmdorfera B, Sönnichsena A. Frequency of  
19  
20 727 medication errors in primary care patients with polypharmacy. *Fam Pract*.  
21  
22 728 2013;30(3):313–9.  
23  
24  
25 729 18. Panesar SS, DeSilva D, Carson-Stevens A, Cresswell KM, Salvilla SA, Slight SP, et al. How  
26  
27 730 safe is primary care? A systematic review. *BMJ Qual Saf*. 2016 Jul;25(7):544–53.  
28  
29  
30 731 19. Slabaugh SL, Maio V, Templin M, Abouzaid S. Prevalence and Risk of Polypharmacy  
31  
32 732 among the Elderly in an Outpatient Setting. *Drugs Aging*. 2010 Dec;27(12):1019–28.  
33  
34  
35 733 20. World Health Organization (WHO). *Multimorbidity: Technical Series on Safer Primary*  
36  
37 734 *Care*. Geneva; 2016.  
38  
39  
40 735 21. Meid AD, Quinzler R, Freigofas J, Saum K, Schöttker B, Holleczeck B, et al. Medication  
41  
42 736 Underuse in Aging Outpatients with Cardiovascular Disease: Prevalence, Determinants,  
43  
44 737 and Outcomes in a Prospective Cohort Study. Reddy H, editor. *PLoS One*. 2015 Aug  
45  
46 738 19;10(8):e0136339.  
47  
48  
49 739 22. Rankin A, Cadogan CA, Patterson SM, Kerse N, Cardwell CR, Bradley MC, et al.  
50  
51 740 Interventions to improve the appropriate use of polypharmacy for older people.  
52  
53 741 *Cochrane Database Syst Rev*. 2018 Sep 3;9.  
54  
55  
56 742 23. Christie J. Interventions to improve the appropriate use of polypharmacy for older  
57  
58 743 people: A Cochrane review summary. *Int J Nurs Stud*. 2019 May;93:84–6.  
59  
60

- 1  
2  
3 744 24. Muth C, Blom JW, Smith SM, Johnell K, Gonzalez-Gonzalez AI, Nguyen TS, et al.  
4  
5 745 Evidence supporting the best clinical management of patients with multimorbidity and  
6  
7 746 polypharmacy: a systematic guideline review and expert consensus. *J Intern Med*.  
8  
9 747 2019;283(3):272–88.  
10  
11  
12 748 25. Bates DW, Kuperman GJ, Wang S, Gandhi T, Kittler A, Volk L, et al. Ten Commandments  
13  
14 749 for Effective Clinical Decision Support: Making the Practice of Evidence-based Medicine  
15  
16 750 a Reality. *J Am Med Informatics Assoc*. 2003 Nov;10(6):523–30.  
17  
18  
19 751 26. Monteiro L, Maricoto T, Solha I, Ribeiro-Vaz I, Martins C, Monteiro-Soares M. Reducing  
20  
21 752 Potentially Inappropriate Prescriptions for Older Patients Using Computerized Decision  
22  
23 753 Support Tools: Systematic Review. *J Med Internet Res*. 2019 Nov 14;21(11):e15385.  
24  
25  
26 754 27. O’Mahony D, O’Sullivan D, Byrne S, O’Connor MN, Ryan C, Gallagher P. STOPP/START  
27  
28 755 criteria for potentially inappropriate prescribing in older people: Version 2. *Age Ageing*.  
29  
30 756 2015;44(2):213–8.  
31  
32  
33 757 28. Dreischulte T, Donnan P, Grant A, Hapca A, McCowan C, Guthrie B. Safer prescribing —  
34  
35 758 a trial of education, informatics, and financial incentives. *N Engl J Med*.  
36  
37 759 2016;374(11):1053–64.  
38  
39  
40 760 29. Muth C, Harder S, Uhlmann L, Rochon J, Fullerton B, Güthlin C, et al. Pilot study to test  
41  
42 761 the feasibility of a trial design and complex intervention on PRIoritising  
43  
44 762 MUltimedication in Multimorbidity in general practices (PRIMUM pilot). *BMJ Open*.  
45  
46 763 2016 Jul 25;6(7):e011613.  
47  
48  
49 764 30. Bergert F, Braun M, Ehrenthal K, Fessler J, Gross J, Hüttner U, et al. Hausärztliche  
50  
51 765 Leitlinie Multimedikation Empfehlungen zum Umgang mit. 2016.  
52  
53  
54 766 31. Muth C, Kirchner H, van den Akker M, Scherer M, Glasziou PP. Current guidelines poorly  
55  
56 767 address multimorbidity: pilot of the interaction matrix method. *J Clin Epidemiol*. 2014  
57  
58 768 Nov;67(11):1242–50.  
59  
60

- 1  
2  
3 769 32. Muth C, Gensichen J, Butzlaff M. DEGAM Leitlinie. Nr. 9: Herzinsuffizienz. Düsseldorf:  
4  
5 770 Omikron Publishing; 2006.  
6  
7  
8 771 33. Renom-Guiteras A, Meyer G, Thürmann P a. The EU(7)-PIM list: a list of potentially  
9  
10 772 inappropriate medications for older people consented by experts from seven European  
11  
12 773 countries. *Eur J Clin Pharmacol*. 2015;71(7):861–75.  
13  
14  
15 774 34. crediblemeds. Combined list of drugs that prolong QT and/or cause torsades de pointes  
16  
17 775 (TDP) [Internet]. 2014. Available from: <https://www.crediblemeds.org/>  
18  
19  
20 776 35. World Health Organization (WHO). ICD-10 Transition. Vol. 18, Family practice  
21  
22 777 management. 2011.  
23  
24  
25 778 36. Quinzler R, Freitag MH, Wiese B, Beyer M, Brenner H, Dahlhaus A, et al. A novel  
26  
27 779 superior medication-based chronic disease score predicted all-cause mortality in  
28  
29 780 independent geriatric cohorts. *J Clin Epidemiol*. 2019 Jan;105:112–24.  
30  
31  
32 781 37. World Medical Association. World Medical Association Declaration of Helsinki. *JAMA*.  
33  
34 782 2013 Nov 27;310(20):2191.  
35  
36  
37 783 38. Campbell MK, Piaggio G, Elbourne DR, Altman DG. Consort 2010 statement: extension  
38  
39 784 to cluster randomised trials. *Bmj*. 2012;345(sep04 1):e5661–e5661.  
40  
41  
42 785 39. Chan A-W, Tetzlaff JM, Altman DG, Laupacis A, Gøtzsche PC, Krleža-Jerić K, et al. SPIRIT  
43  
44 786 2013 statement: defining standard protocol items for clinical trials. *Ann Intern Med*.  
45  
46 787 2013 Feb 5;158(3):200–7.  
47  
48  
49  
50  
51  
52  
53  
54  
55  
56  
57  
58  
59  
60

## CONTRIBUTORS

AIGG drafted the first version of the manuscript with input from BSM and CM. Critical revision of manuscript for important intellectual content: RKM, NT and HT. CM, HT, FMG, DG, WG, SH, RP, PG, HP, UK, PKM, and PI are responsible for study concept and design. PKM is the study director. Acquisition of data: BSM, BF, RH, PKM, TB, LD, TSD, SG, JKN, AP, UK, SS. Analysis and interpretation of data will be performed by RKM, JKN, HT, BS, PI, SS, UK, AP, WG, CM, NT, IM. PI is responsible for strategic data management. CM and NT are the chief investigators of the study. All authors reviewed the paper and read and approved the final manuscript.

## ACKNOWLEDGMENTS

We would like to thank all practice teams and patients for their participation in the study and we also Sandra Rauck and Kiran Chapidi for their contributions as data managers. We appreciate the project management support from BARMER and KVWL. We also thank Phillip Elliott for the language review of the paper.

AdAM study group: Julia Jachmich, Dipl.-Pharm., Consulting Pharmacist (KVWL, Dortmund, Germany), Eva Leicher, Dipl.-Pharm., Consulting Pharmacist (KVWL, Dortmund, Germany), Benjamin Brandt, Project Administration (KVWL, Dortmund, Germany), Johanna Richard, PTA, Prescription Advice (KVWL, Dortmund, Germany), Frank Meyer, Dipl.-Pharm., MPH, Head of Department Corporate Development (KVWL, Dortmund, Germany), Dr. Mathias Flume, Dipl.-Pharm., MBA, Head of Division Member Service (KVWL, Dortmund, Germany), Thomas Müller, Dipl.-Ök. Member of Executive Board (KVWL, Dortmund, Germany), Kiran Chapidi, MBA (Institute of General Practice, Goethe-University, Frankfurt/Main, Germany), Robin Brünn (Institute of General Practice, Goethe-University, Frankfurt/Main, Germany) (bruenn@allgemeinmedizin.uni-frankfurt.de), Jale Basten, M.Sc. (Department of Medical Informatics, Biometry and Epidemiology, Ruhr University, Bochum, Germany), Karolina Beifuß, Dipl.-Ök. (Center for Health Economics and Health Services Research, University of Wuppertal, Germany).



**FUNDING**

This study was funded by the Innovation Fund of the German Federal Joint Committee (grant no 01NVF16006).

**DISCLAIMER**

The funder had no role in the design of the study, or in writing the manuscript.

**ETHICS APPROVAL**

This study was approved by the Ethics Commission of the North-Rhine Medical Association in July 2017 (approval number: 2017184).

**COMPETING INTERESTS**

BSM, RKM, AIGG, RH, JKN, PKM, NT, TB, LD, BS, BF, PI, SS, TSD, AP, IM, UK, HP, WG, FMG, HT, CM report grants from the German Federal Joint Committee during the conduct of the study. DG reports grants from BARMER during the conduct of the study and family member works for and holds shares of IT company involved in the project. SG works for and holds shares of IT company involved in the project. SH, RP, PPG declare that they have no competing interests.

**DATA SHARING**

No additional data available.

**PROTOCOL VERSION**

Protocol version 2.0, March 2020

**PATIENT AND PUBLIC INVOLVEMENT**

Not required.

**WORD COUNT**

5,191

1  
2  
3 **Figure 1. AdAM study flowchart.**  
4

5 cRCT = cluster-randomised controlled trial  
6  
7  
8

9  
10 **Figure 2. AdAM data availability (time flow)**  
11

12 cRCT = cluster-randomised controlled trial  
13  
14  
15  
16  
17  
18  
19  
20  
21  
22  
23  
24  
25  
26  
27  
28  
29  
30  
31  
32  
33  
34  
35  
36  
37  
38  
39  
40  
41  
42  
43  
44  
45  
46  
47  
48  
49  
50  
51  
52  
53  
54  
55  
56  
57  
58  
59  
60

For peer review only

Figure 1. AdAM study flowchart.

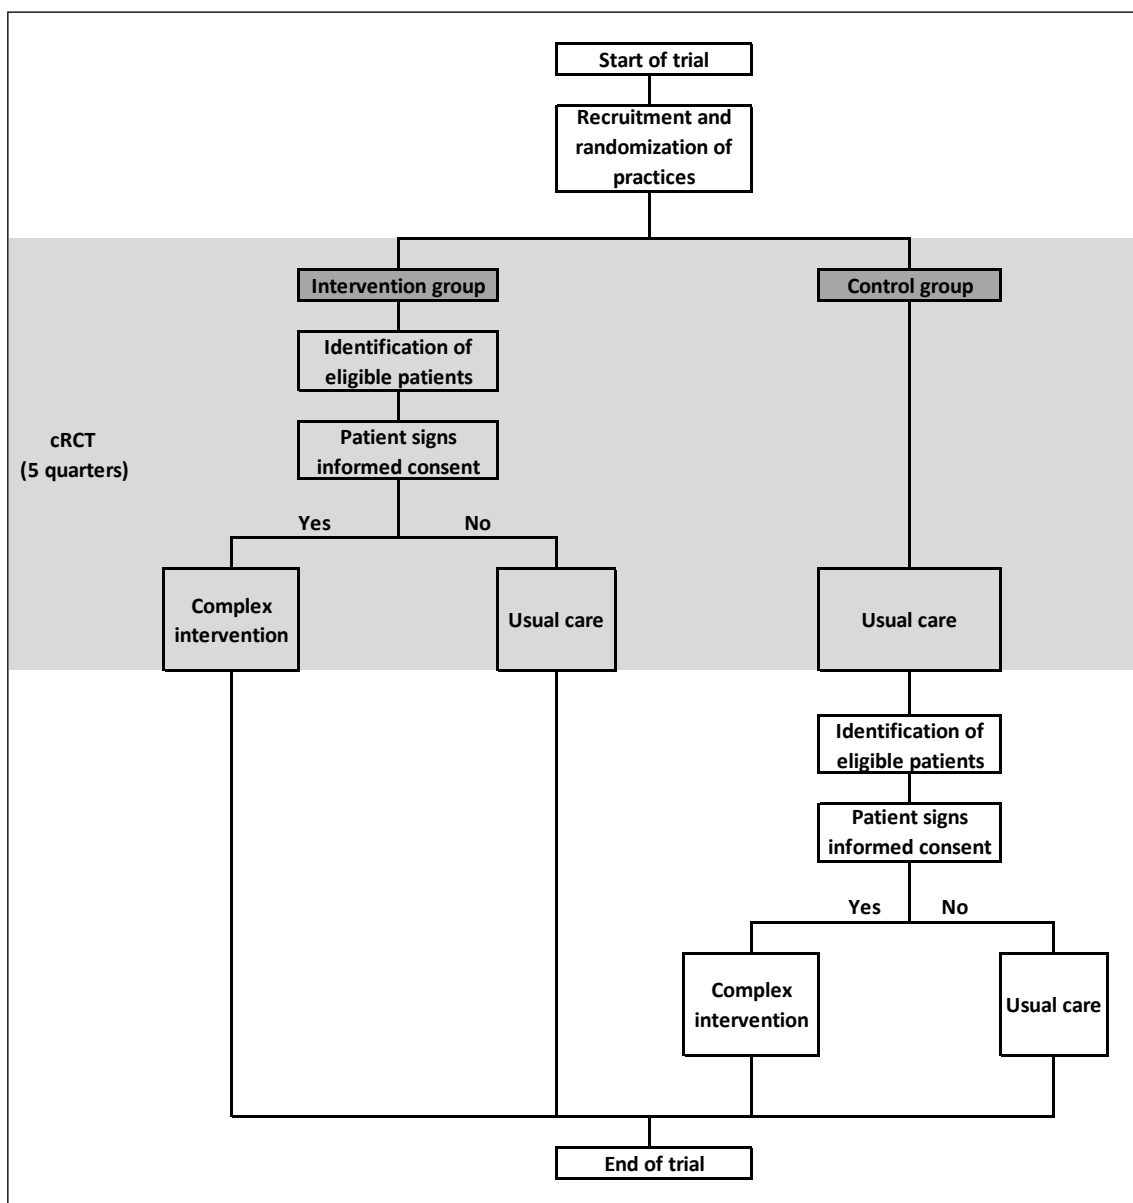

Figure 2. AdAM data availability (time flow)

| Randomization      |                   | 2017        | 2018        |             |             |             | 2019        |             |             |             | 2020        |             |             | 4th quarter          |
|--------------------|-------------------|-------------|-------------|-------------|-------------|-------------|-------------|-------------|-------------|-------------|-------------|-------------|-------------|----------------------|
| Intervention group | Control group     | 4th quarter | 1st quarter | 2nd quarter | 3rd quarter | 4th quarter | 1st quarter | 2nd quarter | 3rd quarter | 4th quarter | 1st quarter | 2nd quarter | 3rd quarter |                      |
| <2nd quarter 2018  | -                 |             |             |             |             |             |             |             |             |             |             |             |             | Statistical analysis |
| 2nd quarter 2018   | -                 |             |             |             |             |             |             |             |             |             |             |             |             |                      |
| 3rd quarter 2018   | -                 |             |             |             |             |             |             |             |             |             |             |             |             |                      |
| 4th quarter 2018   | -                 |             |             |             |             |             |             |             |             |             |             |             |             |                      |
| 1st quarter 2019   | -                 |             |             |             |             |             |             |             |             |             |             |             |             |                      |
| 2nd quarter 2019   | -                 |             |             |             |             |             |             |             |             |             |             |             |             |                      |
|                    | <2nd quarter 2018 |             |             |             |             |             |             |             |             |             |             |             |             |                      |
|                    | 2nd quarter 2018  |             |             |             |             |             |             |             |             |             |             |             |             |                      |
| -                  | 3rd quarter 2018  |             |             |             |             |             |             |             |             |             |             |             |             |                      |
| -                  | 4th quarter 2018  |             |             |             |             |             |             |             |             |             |             |             |             |                      |
| -                  | 1st quarter 2019  |             |             |             |             |             |             |             |             |             |             |             |             |                      |
| -                  | 2nd quarter 2019  |             |             |             |             |             |             |             |             |             |             |             |             |                      |

\* Randomization on 07/03/2019 was assigned to the second quarter of 2019

|                           |  |                     |
|---------------------------|--|---------------------|
| Data cRCT-phase           |  | Intervention period |
|                           |  | Control period      |
| Data additional available |  | Intervention period |
|                           |  | Control period      |

## **Additional file 1. Brief description of AdAM sub-studies**

### **SUB-STUDY BIELEFELD. HEALTH-ECONOMIC ANALYSIS.**

The aim of this sub-study is to estimate the cost-effectiveness of the AdAM intervention compared to usual care.

The economic analysis will be conducted from a third-party payer perspective, which is the perspective of the statutory health insurance funds in Germany. Health effects will be measured by use of the composite endpoint of the clinical study combining hospital admissions and deaths.

The analysis of all reimbursed direct health care costs will be based on health insurance claims data comprising details on physician visits, inpatient hospital stays, pharmaceuticals (prescription medication), outpatient health care services provided by non-physicians and therapeutic appliances, rehabilitation, and sick pay. Arising costs, such as costs of IT-infrastructure, coordination, maintenance, training and fees, will be used to estimate the overall costs of the AdAM intervention. Fees for physicians will be varied in sensitivity analysis.

The cost-effectiveness of the intervention will be measured by the incremental cost-effectiveness ratio (ICER), which is expressed as the ratio of the difference in overall costs between the control and the intervention group and the difference in effects between both groups. For the ICER calculation of the base case, mean values of costs and effects will be used. In sensitivity analysis, also median values will be used.

Further analyses will be based on the composite endpoint's components (hospital admissions and deaths), on life years gained (LYs), and on quality-adjusted life years (QALYs). To determine the LYs, the remaining life expectancy in both the control and intervention group will be estimated using mortality tables. In order to take into account differences in quality of life between ages when calculating QALYs, age-dependent utility values will be obtained from the literature.

All future costs and health effects will be discounted by 3% per year according to recommendations by the German institute for efficiency and quality in health care (IQWiG). In sensitivity analysis, the discount rate will be varied from 0% to 5%.

## **SUB-STUDY KÖLN. ANALYSIS OF BARRIERS AND FACILITATORS: QUALITATIVE INTERVIEWS AND FOCUS GROUPS WITH PHYSICIANS.**

The aim of this sub-study is to identify factors facilitating or hindering the successful implementation of the intervention from a general practitioner's point of view and evaluate which factors facilitate or hinder the effective performance of systematic medication-checks and optimization. Hereby is expected to get insights how the intervention can be optimized and adapted for general practitioners' high-level acceptance and effectiveness of optimized medication-checks by area-wide implementation.

Therefore a multistage mixed-methods-Approach will be conducted (combination of qualitative and quantitative outcomes) (1).

Level 1: To analyze general practitioners subjectively perceived barriers and resources regarding implementation, guided expert-interviews will be conducted (n= 5-10) (face-to-face-interviews or telephone-interviews) (2,3) to explore the field. Therefore, a convenient sample strategy will be applied. Furthermore, formative evaluation will take part during the trial with two additional time points of qualitative data collection related to relevant emerging topics concerning successful implementation.

Level 2: Results of qualitative data collection will be used for understanding practical orientation patterns of general practitioners (how do they actually use AdAM in real life settings) and their conjunctive experiential space (4). Focus groups with general practitioners of intervention and control group (total, n= 4) will be conducted concerning their experiences and expectations of the project.

Level 3: Results of qualitative data collection will be used to prepare a quantitative general practitioners survey, in which all participating physicians of the intervention group will be asked about barriers and facilitators of the implementation. The survey aims representative detection of general practitioners factors, which facilitate or hinder implementation and identify specific attributes of 'early adapters' and 'late adapters' (5). Quantitative data will be evaluated descriptive and by applying appropriate multiple regression models.

The quality of the qualitative research data collection and analysis in interviews and focus groups is assured by audio recording as well as by transcription according to established standards and by independent coding and subsequent interpretation by a group of researchers. Data analysis will comprise qualitative content analysis according to Kuckartz (6).

Quality assurance concerning the survey conduct is assured by standards of survey development, pretesting, Dillman's Total Design (7) method for increasing response rates and data preparation with the Teleform® software.

1  
2  
3  
4 **SUB-STUDY FRANKFURT. ANALYSIS OF BARRIERS, FACILITATORS AND UNINTENDED**  
5 **CONSEQUENCES: QUALITATIVE INTERVIEWS WITH PATIENTS**  
6

7 The aim of this sub-study is to identify factors facilitating or hindering the successful  
8 implementation of the intervention. We especially focus on patient-perceived unintended  
9 consequences of the intervention, e.g. fear resulting from the exchange of information between  
10 several doctors or resentments towards the implemented technology.  
11

12  
13 The sub-study starts after the positive ethics vote dedicated to the qualitative study has been  
14 received (second vote). Patients who have already received the intervention, can be included in  
15 the study (inclusion criterion: invoiced EBM-code). Patients will be recruited by their general  
16 practitioners. General practitioners are trustful “gatekeepers” with the potential to motivate  
17 patients to participate (8). After written informed consent, contact details will be forwarded to  
18 the Institute of General Practice in Frankfurt/Main. A target sample of 20 patients (balanced  
19 with regard to sex, age) out of two or more practices will be included in the study.  
20

21  
22 We will interview the patients via telephone (9); the interviews are expected to take 20-40  
23 minutes each. The interviewer will use a semi-structured interview guide, which will be pilot-  
24 tested in three to four think-aloud-interviews beforehand. Interviews will be audio recorded  
25 after informed consent and transcribed verbatim according to established standards (10). Data  
26 analysis will comprise qualitative content analysis according to Kuckartz (10). Data will be  
27 independently coded and subsequently interpreted by two researchers. The strategy of  
28 subsumption will be used to develop content categories mixed deductively-inductively. Data will  
29 be evaluated supported by software MAXQDA® at Goethe University in the Institute of General  
30 Practice in Frankfurt/Main.  
31  
32  
33  
34  
35  
36  
37  
38  
39  
40  
41  
42  
43  
44  
45  
46  
47  
48  
49  
50  
51  
52  
53  
54  
55  
56  
57  
58  
59  
60

## ADAM PROCESS EVALUATION

A process evaluation is an essential part of the evaluation of complex medical interventions. The process evaluation in AdAM will study the following aspects:

- 1) Numbers of patients per practice from the list of potentially eligible patients that participated in AdAM (“reach”)
- 2) Enrolment rate of GPs, general practices and patients measured as the number of GPs, general practices and patients per potentially eligible number of GPs, general practices and patients during the 15 months from baseline minus baseline (T1–T0) (“reach”).
- 3) Number of patients per practice that were not included in the list of potentially eligible patients that participated in AdAM to evaluate the number of patients who benefit from the AdAM service.
- 4) Quantitative aspects of the intervention: to which extent was the intervention eMMA<sup>®</sup> applied to patients (“dose”)?
  - a. Number of GPs and general practices who use eMMA<sup>®</sup> to print a medication plan 15 months (once a year and more than once a year) from baseline minus baseline (T1–T0).
  - b. Number of safety key figures retrievals and use of patient safety examination to ensure the frequency of use of eMMA<sup>®</sup> safety functionalities (BRAVO quality indicators).
- 5) Qualitative aspects of the intervention: was the intervention eMMA<sup>®</sup> applied as planned (“fidelity”)?
- 6) Adaptation of the intervention: which modifications were made to adjust the intervention to heterogeneous processes in participating practices (“tailoring”)?

Software log files provided by RpDoc<sup>®</sup>Solutions GmbH will comprise the data needed for analyses. Pseudonyms will be used to prevent identification of individual patients, practices or doctors.

Further details of the process evaluation (detailed research questions, MDS) will be provided a priori to the planned analyses.



### ADAM SUSTAINABILITY ASSESSMENT

A fading effect over time in interventions for the improvement of drug management has been mentioned in the literature (11). This sustainability assessment aims to analyze such temporary effects. The goal is to determine if improvements in the prescription of drugs due to eMMA<sup>®</sup> can still be found after more than five quartiles. Therefore, it is necessary for both the intervention group and the control group to receive the intervention, i.e. eMMA<sup>®</sup>.

The sustainability assessment is meant to provide insights on the planned rollout on larger groups. Therefore, it is necessary for the control group to receive the full intervention.

Any further details will be pre-specified in a separate protocol.

For peer review only

## **SUB-STUDY WUPPERTAL: QCAS TO EXPLORE THE RELATIONSHIP BETWEEN ORGANIZATIONAL CONTEXT, IMPLEMENTATION PROCESS AND QUALITY OF CARE**

The aim of this sub-study is to examine the process of effectiveness development, the interaction among key drivers (configurations of success) and to investigate, how these key drivers influence effect sustainability. The analyses of this sub-study will be based on practices of the intervention group of the parallel cluster-randomised controlled trial (c-RCT) and those practices of the control group who joined the intervention mode 15 months after their recruitment. We will include all control group practices who change intervention status at least until 30/06/2020.

QCAs will be based on a conceptual model comprising contextual and implementation process factors affecting intervention's effectiveness. Research suggests that attributes characterising the organisational context are important for the development of habitual behaviour and the successful adoption of interventions (12). In addition, contemporary definitions of organisations have evolved from a closed-system perspective (organisations = isolated systems with no interaction with their environment) to an open-system perspective. Therefore, organisational attributes will be defined on three distinct levels of analysis: 1) the behaviour of individuals, 2) the structural features and 3) the organisation viewed as an entity operating in a larger system of relations (13).

### *Analytic methods*

In a first step, fuzzy set qualitative comparative analysis will be used to identify pathways – that is, different combinations of organisational attributes and implementation process characteristics – associated with:

1. sites' success in attaining a relative risk reduction in the primary end point at the end of the c-RCT (change is measured in comparison to the control groups' results) – QCA 1,
2. short term effects (change of secondary endpoints after the first five months of intervention) – QCA 2.

In a second step, the findings of the first QCA will be integrated in a multilevel model (two-level HML) in which the cross-level interactions of the pathways will be investigated and mechanisms suited for reaching sustainability at the end of a three month follow-up phase will be explored.

To prepare results of the first QCA for use in HLM, a categorisation of each study site as a member of one of the pathways is planned. Only those practices will be included in the multilevel model that are member of a configuration sufficient for outcome and part of c-RCT's intervention group. To explore mechanisms suited for a sustainable intervention effect, the two-level HLM will be estimated with the pathways (configurations) at the macro level. At the micro level a variable, which measures the stability of the attained performance level (dichotomous definition: "1" if there is no increase in all-causes hospital admissions and all-causes deaths per practice over the follow-up phase, otherwise "0") will be included. As explanatory variables the four constructs of the normalisation process theory (NPT; coherence, cognitive participation, collective action, reflexive monitoring) will be considered. This construct will be measured at the beginning of the follow-up phase and by applying the instrument NoMAD (14). They will describe physicians' views about how an intervention impacts on their work, and their expectations about whether it could become a routine part of their work.

1  
2  
3  
4  
5 Site sampling and data source:

6  
7 The first QCA and the multilevel model will include only practices of the intervention group. The  
8 second QCA will use practices of the control group as well, after this group has joined the  
9 intervention mode.  
10

11 Parameters corresponding to factors in the conceptual model will be derived from a survey,  
12 which is organised in two waves (first in 2019, second in 2020). The outcome measure will be  
13 based on secondary data (claims data). In addition, structural data of the practices (e.g. practice  
14 infrastructure, patient structure) and use of support will be obtained from other project partners  
15 (e.g. by extracting information out of CDSS log files).  
16  
17  
18  
19  
20  
21  
22  
23  
24  
25  
26  
27  
28  
29  
30  
31  
32  
33  
34  
35  
36  
37  
38  
39  
40  
41  
42  
43  
44  
45  
46  
47  
48  
49  
50  
51  
52  
53  
54  
55  
56  
57  
58  
59  
60

## REFERENCES

1. Mayring P. Evidenztriangulation in der Gesundheitsforschung. *KZfSS Kölner Zeitschrift für Soziologie und Sozialpsychologie*. 2017 Oct 10;69(S2):415–34.
2. Bogner A, Littig B, Menz W. *Experteninterviews. Theorien, Methoden, Anwendungsfelder*. 3., grundlegend überarbeitete Auflage. Wiesbaden: VS Verlag für Sozialwissenschaft; 2009.
3. Christmann G. Telefonische Experteninterviews. In: Alexander Bogner, Beate Littig und Wolfgang Menz (Hg): *Experteninterviews Theorien, Methoden, Anwendungsfelder 3, grundlegend überarbeitete Auflage*. Wiesbaden: VS Verlag für Sozialwissenschaften; 2009.
4. Bohnsack R. Dokumentarische Methode und sozialwissenschaftliche Hermeneutik. *Zeitschrift für Erziehungswiss*. 2003;6(4):550–70.
5. Rogers EM. Diffusion of preventive innovations. *Addict Behav*. 2002 Nov;27(6):989–93.
6. Kuckartz U. *Einführung in die computergestützte Analyse qualitativer Daten*. Wiesbaden: VS Verlag für Sozialwissenschaften; 2007.
7. Dillman DA, Smyth JS, Christian LM. *Internet, phone, mail, and mixed-mode surveys: the tailored design method*. Wiley; 2014. 528 p.
8. Helfferich F. *Die Qualität qualitativer Daten. Manual für die Durchführung qualitativer Interviews*, 3. Überarbeitete Auflage. Wiesbaden: GWV Fachverlage GmbH; 2009.
9. Flick U. Leitfaden-Interviews. In: *Qualitative Sozialforschung Eine Einführung*. 7th ed. Reinbeck bei Hamburg: Rowohlt; 2007. p. 194–226.
10. Kuckartz U. *Qualitative Inhaltsanalyse. Methoden, Praxis, Computerunterstützung*. Weinheim: Beltz Juventa; 2012.
11. Avery AJ, Rodgers S, Cantrill JA, Armstrong S, Cresswell K, Eden M, et al. A pharmacist-led information technology intervention for medication errors (PINCER): a multicentre, cluster randomised, controlled trial and cost-effectiveness analysis. *Lancet [Internet]*. 2012 Apr;379(9823):1310–9. Available from: <http://linkinghub.elsevier.com/retrieve/pii/S0140673611618175>
12. Damschroder LJ, Aron DC, Keith RE, Kirsh SR, Alexander JA, Lowery JC. Fostering implementation of health services research findings into practice: a consolidated framework for advancing implementation science. *Implement Sci*. 2009 Dec 7;4(1):50.
13. Hogg W, Rowan M, Russell G, Geneau R, Muldoon L. Framework for primary care organizations: the importance of a structural domain. *Int J Qual Heal Care*. 2008 Oct;20(5):308–13.
14. Finch T, Girling M, May C, Mair F, Murray E, Treweek S, et al. Nomad: Implementation measure based on Normalization Process Theory [Internet]. 2015 [cited 2018 Jan 25]. Available from: <http://www.normalizationprocess.org/>

## Patient information

### Application of an electronic medication management support system – AdAM

Dear patient,

Nowadays effective medications are available for the treatment of many illnesses, and it is sometimes necessary that you take a number of different drugs. The aim of the AdAM project is to help ensure that your drugs are carefully selected to avoid unwanted interactions when you take them.

In the following pages, we will explain the project to you and request that you agree to take part in it. The project will be conducted in Westphalia-Lippe and will be scientifically evaluated.

#### What is the aim of the project?

The BARMER health insurance fund and the Westphalia-Lippe Association of Statutory Health Insurance (SHI) Physicians intend that the AdAM project should further improve the safety of patients taking a number of medications at the same time, and help doctors in the treatment of their patients.

What is new about this project is that your family practitioner will be able to retrieve electronic information from the BARMER database. With the help of these data, participating doctors will gain a more comprehensive overview of all their patients' treatments and prescriptions. Specifically, your family practitioner can access information on the medications, remedies and aids that you have been prescribed in the last 36 months, as well as the diagnoses and treatments that have been documented in the system, including those by other doctors.

All this information will make it easier to check your drug therapy for possible interactions and intolerances. Additionally, you will receive a medication plan with the names of your medications, dosage information, and further easy-to-understand information on taking your drugs.

In order that doctors can call up the required data, every participating practice is electronically linked to an assigned BARMER computer via the Association of SHI Physicians (gkvi, based in Wuppertal, [www.gkvi.de](http://www.gkvi.de)).

#### Who is eligible to participate in the project?

All patients insured by BARMER may participate in the project and receive treatment from one of the participating family practitioners. To be eligible for participation, patients must be taking three prescription medications.

#### How and what will be scientifically evaluated?

On the one hand, the project will evaluate whether the intervention has enabled hospitalization to be avoided and whether it has led to any changes in drug therapies (project phase 1). On the other hand, the project will check whether these changes have been lasting (project phase 2).

As the first phase of the project is a so-called cluster-randomized study, only half of the participating doctors and their patients may participate in the intervention. It is important to separate the doctors into an intervention group and a control group to determine whether the project has any influence on the success of the therapy. In the second phase of the project, the investigation will aim to determine whether any changes are lasting. In this phase, which will begin after 15 months, doctors in the control group and their patients may also participate in the project intervention.

#### What is the actual project procedure?

After your doctor has provided you with detailed information and you have read this patient information leaflet, you can provide your written agreement to participate. Subsequently, your family practitioner will immediately be able to retrieve and use data on your treatments that are stored in the BARMER computer. This will be made possible using a particularly secure connection between the family practice and the BARMER computer via the Westphalia-Lippe Association of SHI Physicians (KVWL, based in Dortmund).

1  
2  
3 The data stored in the BARMER computer and the current status of your treatment will then be  
4 compared and updated on the basis of a personal consultation with your doctor in the family practice.  
5 After the consultation, the family practitioner will use a computer program that has been specially  
6 developed for the project to check your drug therapy for any unwanted interactions.

7  
8 Should it be necessary, the doctor will contact medical specialists that are treating you and agree on  
9 changes to your medication. Afterwards, patients will receive a medication plan that has been updated  
10 according to your needs, and which includes all important information.

### 11 **Will my participation in the project cost anything?**

12 Participation in the project is free of charge for patients.

### 13 **Can I end my participation in the project prematurely?**

14  
15 The agreement to participate can be withdrawn at any time without providing reasons for doing so, and  
16 will not have any negative effects on your medical treatment. It is simply necessary to state that you  
17 wish to cancel your participation in written form and send the cancellation letter to BARMER at the  
18 following address:  
19

20  
21 BARMER, Subject: AdAM project, Lichtscheider Str. 89, 42285 Wuppertal

### 22 **What will happen to my data?**

23  
24 The family practitioner is the only person to have complete access to patients' treatment data stored at  
25 BARMER, and you have signed the agreement to participate only with reference to your family  
26 practitioner.

27  
28 The data used in the project will be transmitted and stored in encrypted form. Family practitioners can  
29 only make changes to data they have entered into the database during the course of the project.

30  
31 Your family practice will transmit your signed declaration of consent and agreement to participate to  
32 the Westphalia-Lippe Association of SHI Physicians where it will be stored electronically. The signed  
33 document will then be forwarded to BARMER. All participating patients will be registered with the  
34 Westphalia-Lippe Association of SHI Physicians and the BARMER insurance fund for the purpose of  
35 carrying out the project, as well as healthcare accounting.

36  
37 Your family practitioner will be permitted to access all the medical data stored at BARMER for a period  
38 of up to three years. The data will include an overview of all the doctors that have treated you,  
39 including their documented diagnoses, all prescription invoices and information on hospitalization  
40 (inpatient diagnoses, dates of admission and discharge, name of the hospital). You have the right to  
41 see, correct and delete data that has been entered into the database by the doctor, as well as the right  
42 to object to specific data and the right to data portability.

43  
44 The data on participating patients will be made available to the universities that have been  
45 commissioned to conduct the scientific evaluation in pseudonymized form. Pseudonymized means  
46 that names and other personally identifiable information (e.g., social insurance number) will be  
47 replaced with artificial identifiers, so that research scientists are unable to recognize the specific  
48 person that is referred to.

49  
50 Should a participating patient file an objection, or wish to discontinue participation in the project, or if  
51 the contract with the Westphalia-Lippe Association of SHI Physicians is cancelled, all data that have  
52 been collected as part of the project will, on receipt of the corresponding notification, be deleted.

### 53 **Who do I contact if I have any further questions?**

54  
55 If you have any further questions, please call the toll-free telephone number 0800 333 004 327 331  
56 from a German fixed or mobile phone network.  
57  
58  
59  
60

Participating doctor's personal seal

## DECLARATION OF CONSENT AND AGREEMENT TO PARTICIPATE IN THE PROJECT

### **Application of an electronic medication management support system**

The Westphalia-Lippe Association of Statutory Health Insurance Physicians (KVWL) and the BARMER health insurance fund have signed a contract for the application of an electronic medication management support system. In abbreviated form, the project is also known as **AdAM**.

#### **Declaration of consent and agreement to participate**

I have been extensively and comprehensively informed about the nature, significance and implications of the AdAM project. I have read and understood the text of the patient information leaflet. I had the opportunity to discuss the implementation of the project with my family practitioner. All my questions were answered to my satisfaction.

I agree to permit my doctor to retrieve data on my invoiced treatments and drug prescriptions from all physicians that have treated me over the past 36 months on an ongoing basis. I would like my doctor to comprehensively check my medication on the basis of a cross-physician overview of all my treatment data. My family practitioner will also receive information on my hospitalizations, including diagnoses documented by hospitals, as well as, for example, invoiced prescriptions for remedies and medical aids, and nursing care. I am pleased that my doctor will be supported by BARMER in my medication and care management.

If necessary, I consent to my doctor contacting my other medical specialists in order to discuss my drug therapy.

My participation in this project is voluntary. Participation under the conditions of the contract begins when I sign this declaration of consent. My participation ends when I revoke or cancel this declaration, when the contract expires, or if I am no longer insured by BARMER.

I also agree that the Westphalia-Lippe Association of Statutory Health Insurance Physicians (KVWL, based in Dortmund) and BARMER should collect, process and otherwise use my data in order to carry out this project, as well as for healthcare accounting. This agreement to participate will be electronically recorded at KVWL and transmitted to BARMER. KVWL and BARMER will treat my data confidentially and in compliance with prevailing data protection regulations.

#### **Cancellation policy**

I can cancel my participation within two weeks of signing an agreement to participate without providing reasons. To meet the deadline, it is sufficient that notice of cancellation is sent to BARMER in due time. After the deadline has expired, it remains possible to cancel participation in the project. In order to provide notice or cancel, a notice of cancellation should be sent in written form to the following address:

BARMER, Subject: Project AdAM, Lichtscheider Str. 89, 42285 Wuppertal.

|                                                                                                                                                    |                                         |        |
|----------------------------------------------------------------------------------------------------------------------------------------------------|-----------------------------------------|--------|
| Krankenkasse bzw. Kostenträger<br><b>BARMER</b>                                                                                                    |                                         |        |
| Name, Vorname des Versicherten<br><FV31901_Komplettname><br><FV31901_Vorname><br><FV31901_Strasse> >FV31901_Hausnr><br><FV31901_PLZ> <FV31901_Ort> |                                         |        |
| geb. am<br><FV31901_Gebdatum>                                                                                                                      |                                         |        |
| Kostenträgerkennung<br><b>104940005</b>                                                                                                            | Versicherten-Nr.<br><FV31901_KVNR><br>> | Status |
| Betriebsstätten-Nr.<br><FV31901_BSNR>                                                                                                              | Arzt-Nr.<br><FV31901_LELANR>            | Datum  |

QR-Code

18mm x 18mm

### Declaration of consent and agreement to participate

DECLARATION OF CONSENT AND AGREEMENT TO PARTICIPATE IN THE PROJECT:

#### Application of an electronic medication management support system

**I agree to participate in the project for the application of drug therapy and care management (AdAM).**

I have received one copy each of the patient information leaflet and the declaration of consent. A further copy will remain in the practice and the signed original will be sent by mail to the Association of Statutory Health Insurance Physicians (KVWL, Dortmund), where it will be electronically registered and forwarded to BARMER.

Date (DD. MM.YYYY)

Signature of patient or legal representative

#### Consent that data may be used for the purpose of scientific evaluation and monitoring

I further agree that, in pseudonymized form and in compliance with prevailing legal requirements, my medical treatment and prescription data may be used for the purpose of scientifically evaluating the cost effectiveness, efficiency and quality of treatment/care management. The scientific evaluation will be conducted by research staff at the participating universities in the German states of North Rhine-Westphalia and Hesse. Pseudonymization means that my name and other identifiers (e.g. social insurance number) will be replaced by labels that rule out the identification of my person.

Date (DD.MM.YYYY)

Signature of patient or legal representative

The physician will mail the original declaration of consent to:

**KVWL, Projekt AdAM, Robert-Schimrigk-Str. 4-6, 44141 Dortmund.**

A copy will also be provided to the patient, and a further copy included in the patient's records at the practice.



## Additional file 3. RpDoc® medical database

### Screening for and assessment of drug interactions

#### Goal setting

The medical-scientific editorial team of RpDoc® Solutions GmbH identifies drug interactions by continuously monitoring medical-scientific publications and the notifications of national and international regulatory authorities. A structured process is then employed to systematically analyze and assess them. To help doctors and pharmacists analyze and evaluate drug therapies, the updated knowledge of management options concerning clinically relevant interactions is then summarized and the interactions and management options, along with references, entered into the RpDoc® medical database.

In addition, the RpDoc® medical database contains recommendations made to avoid specific drug combinations that may result from the parallel application of guidelines for individual diseases in patients with multimorbidity. These recommendations have been unanimously agreed upon by medical and pharmaceutical societies and are published as S2K Guidelines by the AWMF Working Group of Scientific Medical Societies.

The basic principles of screening for and evaluating interactions for the RpDoc® medical databases are presented below.

#### Screening for interactions

The medical-scientific editorial team of RpDoc® Solutions GmbH monitors more than 8,000 peer-reviewed scientific journals listed in the EMBASE or the PUBMED database every week. Risk warnings issued by American and European regulatory authorities for medicinal products, the FDA and EMA, as well as by the German Federal authorities responsible for pharmaceuticals, the Federal Institute for Drugs and Medical Devices (BfArM), and the Paul-Ehrlich Institute, are also monitored weekly. Risk warnings issued by the Drug Commission of the German Medical Association (AkdÄ) and the Drug Commission of German Pharmacists (AMK) are also taken into account.

#### Assessment of causality

The WHO UMC algorithm is used to evaluate the causality of adverse drug reactions and the information entered into the RpDoc® medical database.

The various methodological approaches available to categorize the causality of adverse drug reactions were compared in a review published in 2018[1]. The WHO algorithm (WHO-UMC) proved to be the most suitable for assessing the causality of adverse drug reactions resulting from drug interactions. It was developed for the International Drug Monitoring Program by the WHO, in collaboration with national pharmacovigilance centers, and is also suitable for the assessment of warning signals stemming from case reports [2]. In contrast to the Naranjo algorithm, WHO-UMC is also suitable for assessing organ toxicity, side effects of overdoses, and drug interactions [3, 4].

DIPS (Drug Interaction Probability Scale) criteria were used to evaluate case descriptions of drug interactions [5].

### Assessment of quality of evidence

The evaluation of quality of evidence is based on the GRADE system (Grading of recommendations Assessment, Development and Evaluation) [6]. In evidence evaluations, prospective randomized studies and meta-analyses are generally assumed to provide high quality evidence. However, indications of adverse drug interactions are often found in case reports and non-randomized studies. Such warnings as those found in Dear Doctor letters from pharmaceutical manufacturers and drug safety mails from the Drug Commission of the German Medical Association can nevertheless be plausible and justify strong recommendations on how to avoid a specific risk.

In the absence of randomized studies, GRADE can still be used. The instrument of "Good Practice Statements" is suitable for situations in which no prospective randomized studies exist, but convincing indirect evidence is available [7]. Good practice statements can justify strong recommendations even if no randomized studies exist, as long as indirect evidence unequivocally supports the recommendation, and other criteria are met [7]. In this case, different sources of evidence can be informally linked (linked evidence) to one another in order to provide information on net benefit [7].

### An example of an evaluation of clinical relevance

For liability reasons, pharmaceutical manufacturers provide information on every conceivable risk associated with the use of their drugs, both individually and in combination with other medications, regardless of clinical relevance. When analyzing a drug therapy, consideration of these risk warnings will result in consideration of a high proportion of irrelevant warnings ("alert overkill") [8]. In order to achieve practical relevance, it is necessary to limit warnings to those that are clinically relevant, i.e. to warnings that should be considered when making therapy decisions [9, 10]. The resulting difference is illustrated in the following example:

Product information (Section 4.5) on siponimod (Mayzent) notes that siponimod should not be administered in combination with medicines that "prolong the QT interval". It is only logical that this contraindication is consistently found in databases that contain product information, e.g. in the IBM Micromedex database (classified as "major" = red).

Studies have been submitted by the pharmaceutical company for approval and are available in the European Product Assessment Report of the EMA. These clearly show that siponimod does not increase the QT interval: "A thorough QT study was conducted (study A2118). No effect of siponimod on the QTc interval was detected. ... metabolites are not expected to have significant effects on the QTc interval." (EMA / CHMP / 652767/2019).

However, the studies also show that siponimod lowers the heart rate. A reduction in heart rate extends the intervals measured by ECGs, including the QT interval, but not the frequency-corrected QT interval that determines the risk of sudden cardiac death. The RpDoc® medical database therefore includes no warning against administering siponimod at the same time as QT interval prolonging drugs, but rather against drugs that may result in additive heart rate reduction.

### Design of the recommendations

1  
2  
3 The design of recommendations has a significant influence on their applicability and effectiveness in  
4 practice. In order to facilitate the implementation of recommendations, management options aimed  
5 at minimizing risks should be provided in addition to descriptions of avoidable risks [11]. When a  
6 warning has high specificity, e.g. because it names particularly affected patient groups or dosages, its  
7 effectiveness is increased [10].  
8

9  
10 When formulating recommendations for action, the recommendations developed by a group of  
11 experts on the content of interaction warnings are taken into account [12]. In addition to information  
12 on the unwanted effects of a specific drug combination, information on predisposing and risk-  
13 minimizing factors, the incidence of adverse effects, and the level of evidence concerning the risk of  
14 interaction, are also provided. Pharmacological plausibility and the mechanism of interaction are  
15 presented in addition to management options. In particular, references are made to equivalent  
16 therapeutic alternatives, as well as recommended surveillance measures in case the drug  
17 combination is maintained.  
18  
19

### 20 21 22 Recommendations for action on drug therapies in multimorbidity

23  
24 There are guidelines for the evidence-based treatment of numerous diseases, but the parallel  
25 application of guidelines for each individual disease can, in multimorbidity, lead to unfavorable and  
26 risky drug combinations [13].  
27

28 To resolve these therapeutic conflicts, medical and pharmaceutical scientific societies develop  
29 recommendations for action that the AWMF, with the support of the AdAM and TOP innovation fund  
30 projects, publishes in S2K Guidelines. RpDoc® Solutions GmbH is involved in both these innovation  
31 fund projects as a technology partner, and recommendations developed for drug therapies in  
32 multimorbidity are continuously updated in the RpDoc® medical database.  
33  
34

35 For an overview of the AdAM and TOP projects, please see the brief summary provided by the joint  
36 federal committee (<https://innovationsfonds.g-ba.de/>).  
37  
38

### 39 40 References:

- 41 1. Behera, S.K., et al., Comparison of different methods for causality assessment of adverse  
42 drug reactions. *Int J Clin Pharm*, 2018. 40(4): p. 903-910.
- 43 2. Meyboom, R.H., et al., Causal or casual? The role of causality assessment in  
44 pharmacovigilance. *Drug Saf*, 1997. 17(6): p. 374-89.
- 45 3. Agbabiaka, T.B., J. Savovic, and E. Ernst, Methods for causality assessment of adverse drug  
46 reactions: a systematic review. *Drug Saf*, 2008. 31(1): p. 21-37.
- 47 4. Thaker, S.J., et al., Evaluation of inter-rater agreement between three causality assessment  
48 methods used in pharmacovigilance. *J Pharmacol Pharmacother*, 2016. 7(1): p. 31-3.
- 49 5. Horn, J.R., P.D. Hansten, and L.N. Chan, Proposal for a new tool to evaluate drug interaction  
50 cases. *Ann Pharmacother*, 2007. 41(4): p. 674-80.
- 51 6. Guyatt, G., et al., GRADE guidelines: 1. Introduction—GRADE evidence profiles and summary  
52 of findings tables. *Journal of Clinical Epidemiology*, 2011. 64(4): p. 383-394.
- 53 7. Guyatt, G.H., et al., Guideline panels should seldom make good practice statements:  
54 guidance from the GRADE Working Group. *Journal of Clinical Epidemiology*, 2016. 80: p. 3-7.
- 55 8. Glassman, P.A., et al., Improving recognition of drug interactions: benefits and barriers to  
56 using automated drug alerts. *Med. Care*, 2002. 40(12): p. 1161-1171.  
57  
58  
59  
60

- 1
  - 2
  - 3
  - 4
  - 5
  - 6
  - 7
  - 8
  - 9
  - 10
  - 11
  - 12
  - 13
  - 14
  - 15
  - 16
  - 17
  - 18
  - 19
  - 20
  - 21
  - 22
  - 23
  - 24
  - 25
  - 26
  - 27
  - 28
  - 29
  - 30
  - 31
  - 32
  - 33
  - 34
  - 35
  - 36
  - 37
  - 38
  - 39
  - 40
  - 41
  - 42
  - 43
  - 44
  - 45
  - 46
  - 47
  - 48
  - 49
  - 50
  - 51
  - 52
  - 53
  - 54
  - 55
  - 56
  - 57
  - 58
  - 59
  - 60
9. Wright, A., et al., Reduced Effectiveness of Interruptive Drug-Drug Interaction Alerts after Conversion to a Commercial Electronic Health Record. *J Gen Intern Med*, 2018.
  10. Heringa, M., et al., Better specification of triggers to reduce the number of drug interaction alerts in primary care. *Int J Med Inform*, 2018. 109: p. 96-102.
  11. Seidling, H.M., et al., Factors influencing alert acceptance: a novel approach for predicting the success of clinical decision support. *J Am Med Inform Assoc*, 2011. 18(4): p. 479-84.
  12. Floor-Schreudering, A., et al., Checklist for standardized reporting of drug-drug interaction management guidelines. *Eur J Clin Pharmacol*, 2014. 70(3): p. 313-8.
  13. Dumbreck, S., et al., Drug-disease and drug-drug interactions: systematic examination of recommendations in 12 UK national clinical guidelines. *BMJ*, 2015. 350: p. h949.

For peer review only

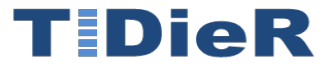

Template for Intervention  
Description and Replication

## The TIDieR (Template for Intervention Description and Replication) Checklist\*:

Information to include when describing an intervention and the location of the information

| Item number | Item                                                                                                                                                                                                                                                                                                 | Where located **                              |                   |
|-------------|------------------------------------------------------------------------------------------------------------------------------------------------------------------------------------------------------------------------------------------------------------------------------------------------------|-----------------------------------------------|-------------------|
|             |                                                                                                                                                                                                                                                                                                      | Primary paper<br>(page or appendix<br>number) | Other † (details) |
|             | <b>BRIEF NAME</b>                                                                                                                                                                                                                                                                                    |                                               |                   |
| 1.          | Provide the name or a phrase that describes the intervention.                                                                                                                                                                                                                                        | 1, 11                                         | _____             |
|             | <b>WHY</b>                                                                                                                                                                                                                                                                                           |                                               |                   |
| 2.          | Describe any rationale, theory, or goal of the elements essential to the intervention.                                                                                                                                                                                                               | 10,11                                         | _____             |
|             | <b>WHAT</b>                                                                                                                                                                                                                                                                                          |                                               |                   |
| 3.          | Materials: Describe any physical or informational materials used in the intervention, including those provided to participants or used in intervention delivery or in training of intervention providers.<br>Provide information on where the materials can be accessed (e.g. online appendix, URL). | 16                                            | _____             |
| 4.          | Procedures: Describe each of the procedures, activities, and/or processes used in the intervention, including any enabling or support activities.                                                                                                                                                    | 16, 17                                        | _____             |
|             | <b>WHO PROVIDED</b>                                                                                                                                                                                                                                                                                  |                                               |                   |
| 5.          | For each category of intervention provider (e.g. psychologist, nursing assistant), describe their expertise, background and any specific training given.                                                                                                                                             | 17                                            | _____             |
|             | <b>HOW</b>                                                                                                                                                                                                                                                                                           |                                               |                   |
| 6.          | Describe the modes of delivery (e.g. face-to-face or by some other mechanism, such as internet or telephone) of the intervention and whether it was provided individually or in a group.                                                                                                             | 16, 17                                        | _____             |
|             | <b>WHERE</b>                                                                                                                                                                                                                                                                                         |                                               |                   |
| 7.          | Describe the type(s) of location(s) where the intervention occurred, including any necessary infrastructure or relevant features.                                                                                                                                                                    | 16, 17                                        | _____             |

1  
2  
3  
4  
5  
6  
7  
8  
9  
10  
11  
12  
13  
14  
15  
16  
17  
18  
19  
20  
21  
22  
23  
24  
25  
26  
27  
28  
29  
30  
31  
32  
33  
34  
35  
36  
37  
38  
39  
40  
41  
42  
43  
44  
45  
46

|                          |                                                                                                                                                                                   |     |
|--------------------------|-----------------------------------------------------------------------------------------------------------------------------------------------------------------------------------|-----|
| <b>WHEN and HOW MUCH</b> |                                                                                                                                                                                   |     |
| 8.                       | Describe the number of times the intervention was delivered and over what period of time including the number of sessions, their schedule, and their duration, intensity or dose. | 16  |
| <b>TAILORING</b>         |                                                                                                                                                                                   |     |
| 9.                       | If the intervention was planned to be personalised, titrated or adapted, then describe what, why, when, and how.                                                                  | N/A |
| <b>MODIFICATIONS</b>     |                                                                                                                                                                                   |     |
| 10.*                     | If the intervention was modified during the course of the study, describe the changes (what, why, when, and how).                                                                 | N/A |
| <b>HOW WELL</b>          |                                                                                                                                                                                   |     |
| 11.                      | Planned: If intervention adherence or fidelity was assessed, describe how and by whom, and if any strategies were used to maintain or improve fidelity, describe them.            | 11  |
| 12.*                     | Actual: If intervention adherence or fidelity was assessed, describe the extent to which the intervention was delivered as planned.                                               | N/A |

\*\* **Authors** - use N/A if an item is not applicable for the intervention being described. **Reviewers** – use ‘?’ if information about the element is not reported/not sufficiently reported.

† If the information is not provided in the primary paper, give details of where this information is available. This may include locations such as a published protocol or other published papers (provide citation details) or a website (provide the URL).

‡ If completing the TIDieR checklist for a protocol, these items are not relevant to the protocol and cannot be described until the study is complete.

\* We strongly recommend using this checklist in conjunction with the TIDieR guide (see *BMJ* 2014;348:g1687) which contains an explanation and elaboration for each item.

\* The focus of TIDieR is on reporting details of the intervention elements (and where relevant, comparison elements) of a study. Other elements and methodological features of studies are covered by other reporting statements and checklists and have not been duplicated as part of the TIDieR checklist. When a **randomised trial** is being reported, the TIDieR checklist should be used in conjunction with the CONSORT statement (see [www.consort-statement.org](http://www.consort-statement.org)) as an extension of **Item 5 of the CONSORT 2010 Statement**. When a **clinical trial protocol** is being reported, the TIDieR checklist should be used in conjunction with the SPIRIT statement as an extension of **Item 11 of the SPIRIT 2013 Statement** (see [www.spirit-statement.org](http://www.spirit-statement.org)). For alternate study designs, TIDieR can be used in conjunction with the appropriate checklist for that study design (see [www.equator-network.org](http://www.equator-network.org)).

**Additional file 5. Specifications related to the secondary outcome measures**

Each of the condition listed (•) must be met for the respective secondary outcome to be fulfilled.

SO<sub>pim</sub>-1:

- Diagnosed with any of the following ICD-10: K20-21, K25-28
- Prescribed ATC M01A (except M01AB55 and M01AE52)
- Not prescribed ATC A02B

SO<sub>pim</sub>-2:

- Age 65+
- Prescribed ATC M01A (except M01AB55 and M01AE52)
- Not prescribed ATC A02B

SO<sub>pim</sub>-3

- Prescribed ATC B01AC
- Prescribed ATC M01A (except M01AB55 and M01AE52)
- Not prescribed ATC A02B

SO<sub>pim</sub>-4

- Prescribed either ATC B01AC34 or a combination of ATC B01AC06 with any of the following

ATC: B01AC04, B01AC24, B01AC22

- Not prescribed ATC A02B

SO<sub>pim</sub>-5

- Prescribed any of the following ATC: B01AA, B01AE, B01AF
- Prescribed ATC M01A (except M01AB55 and M01AE52)
- Not prescribed ATC A02B

SO<sub>pim</sub>-6

- Prescribed ATC B01AA

- 1  
2  
3 • Prescribed ATC B01AC  
4

- 5 • Not prescribed ATC A02B  
6

7  
8 SOPim-7

- 9  
10 • Prescribed any of the following ATC: G04BX18, N06AB, N06AX16, N06AX17, N06AX21  
11

- 12 • Prescribed ATC M01A (except M01AB55 and M01AE52)  
13

- 14 • Not prescribed ATC A02B  
15

16  
17 SOPim-8

- 18  
19 • Prescribed any of the following ATC: H02AB, H02BX  
20

- 21 • Prescribed ATC M01A (except M01AB55 and M01AE52)  
22

- 23 • Not prescribed ATC A02B  
24

25  
26 SOPim-9

- 27 • Prescribed ATC C09  
28

- 29 • Prescribed ATC M01  
30  
31

32  
33 SOPim-10

- 34 • Prescribed any of the following ATC: C03AA, C03BA, C03CA, C03D, C03E  
35

- 36 • Prescribed ATC M01A  
37  
38

39  
40 SOPim-11

- 41 • Diagnosed with ICD-10 I50  
42

- 43 • Prescribed ATC M01A  
44  
45

46  
47 SOPim-12

- 48 • Diagnosed with ICD-10 I50  
49

- 50 • Prescribed ATC N06AA  
51

52  
53 SOPim-13

- 54 • Prescribed any of the following ATC: C03D, C09  
55

- 56 • Prescribed ATC A12BA  
57  
58

59  
60 SOPim-14



- Diagnosed with ICD-10 I50
- Prescribed any of the following ATC: C07AA, C07BA, C07DA, S01ED (except S01ED02)

## SOpim-15

- Age 65+
- Prescribed any of the following ATC: A03FA03, A04AA01, B01AC23, C01BC04, C01BD01, C01BD07, C07AA07, C08DA81, H01BA04, L01XE12, L01XX35, N05AA02, N05AC02, N05AD01, N05AD08, N05AF03, N05AG02, N05AL01, N06AB04, N06AB10, N06DA02, N07BC02, P01BA01, P01BA02

## SOpim-16

- Any of the following:
  1.
    - Prescribed any two of the following ATC: A03FA03, A04AA01, B01AC23, C01BC04, C01BD01, C01BD07, C07AA07, C08DA81, H01BA04, L01XE12, L01XX35, N05AA02, N05AC02, N05AD01, N05AD08, N05AF03, N05AG02, N05AL01, N06AB04, N06AB10, N06DA02, N07BC02, P01BA01, P01BA02
  2.
    - Prescribed any of the following ATC: C01BC04, N05AC02, N06DA02, A04AA01, N05AD01, N06AB04, N06AB10
    - Prescribed any of the following ATC: A08AA62, N06AX12, N07BA02, H05BX01, N06AB03, N06AB05, C08DA81
  3.
    - Prescribed any of the following ATC: A04AA01, N05AD01, N06AB04, N06AB10, A03FA03, B01AC23, C08DA81, N05AG02, N07BC02
    - Prescribed any of the following ATC: A02BD04, A02BD05, J01FA09, J05AE02, J02AC02, J02AB02, J05AE03, J05AP53, J05AR10, J05AE01, L01XX47, L01XE42, J01FA15

1  
2  
3  
4  
5  
6  
7  
8  
9  
10  
11  
12  
13  
14  
15  
16  
17  
18  
19  
20  
21  
22  
23  
24  
25  
26  
27  
28  
29  
30  
31  
32  
33  
34  
35  
36  
37  
38  
39  
40  
41  
42  
43  
44  
45  
46  
47  
48  
49  
50  
51  
52  
53  
54  
55  
56  
57  
58  
59  
60

4.

- Diagnosed with any of the following ICD-10: I50, R00.1, I49.5, I49.8
- Prescribed any of the following ATC: A03FA03, A04AA01, B01AC23, C01BC04, C01BD01, C01BD07, C07AA07, C08DA81, H01BA04, L01XE12, L01XX35, N05AA02, N05AC02, N05AD01, N05AD08, N05AF03, N05AG02, N05AL01, N06AB04, N06AB10, N06DA02, N07BC02, P01BA01, P01BA02

#### SOpim-17

- Prescribed ATC C01AA
- Prescribed any of the following ATC: C03AA, C03BA, C03CA, C07B, C07C, C08GA23, C09BA, C09BX01, C09BX03, C09DA, C09DX01, C09DX03, C09DX06, C09DX07, C09XA52, C09XA54
- Not prescribed ATC A12BA

#### SOpim-18

- Age 65+
- Prescribed any of the following ATC: A03CA02, C04AD03, C04AE01, C04AE02, C04AE04, C04AE54, C04AX01, C04AX07, C04AX10, C04AX17, C04AX20, C04AX21, C05CA05, C05CA07, C05CA51, C05CA54, M03BA02, M03BA03, M03BC01, M03BX01, M03BX02, M03BX07, M03BX08, N02AB02, N03AE01, N04AA01, N04AA02, N04AA12, N04AC01, N04BB01, N04BC08, N05AA01, N05AA02, N05AA04, N05BA05, N05AB02, N05AB03, N05AB04, N05AC01, N05AC02, N05AD01, N05AD08, N05AE03, N05AF05, N05AG02, N05AH02, N05AH03, N05BA01, N05BA02, N05BA03, N05BA04, N05BA05, N05BA06, N05BA08, N05BA09, N05BA11, N05BA12, N05BA13, N05BA16, N05BA18, N05BA21, N05CD01, N05CD02, N05CD03, N05CD04, N05CD05, N05CD06, N05CD07, N05CD08, N05CD09, N05CD10, N05CD11, N05CF01, N05CF02, N05CF03, N06AA01, N06AA02, N06AA04, N06AA06, N06AA09, N06AA10, N06AA12, N06AA21, N06AB05, N06AB08, N06AX16, N06DX02

## SOpim-19

- Diagnosed with any of the following ICD-10: G20-23
- Prescribed any of the following ATC: A03CA02, C04AD03, C04AE01, C04AE02, C04AE04, C04AE54, C04AX01, C04AX07, C04AX10, C04AX17, C04AX20, C04AX21, C05CA05, C05CA07, C05CA51, C05CA54, M03BA02, M03BA03, M03BC01, M03BX01, M03BX02, M03BX07, M03BX08, N02AB02, N03AE01, N04AA01, N04AA02, N04AA12, N04AC01, N04BB01, N04BC08, N05AA01, N05AA02, N05AA04, N05BA05, N05AB02, N05AB03, N05AB04, N05AC01, N05AC02, N05AD01, N05AD08, N05AE03, N05AF05, N05AG02, N05AH02, N05AH03, N05BA01, N05BA02, N05BA03, N05BA04, N05BA05, N05BA06, N05BA08, N05BA09, N05BA11, N05BA12, N05BA13, N05BA16, N05BA18, N05BA21, N05CD01, N05CD02, N05CD03, N05CD04, N05CD05, N05CD06, N05CD07, N05CD08, N05CD09, N05CD10, N05CD11, N05CF01, N05CF02, N05CF03, N06AA01, N06AA02, N06AA04, N06AA06, N06AA09, N06AA10, N06AA12, N06AA21, N06AB05, N06AB08, N06AX16, N06DX02

## SOum-1

- Diagnosed with ICD-10 I48
- Not prescribed any of the following ATC: B01AA, B01AE, B01AF

## SOum-2

- Diagnosed with any of the following ICD-10: I20-I22, I24-25, I63-66, I69, I70-72, I74
- Not prescribed any of the following ATC: B01AC04, B01AC06, B01AC22, B01AC24, B01AC34, B01AC36

## SOum-3

- Diagnosed with any of the following ICD-10: I20-25
- Not prescribed ATC C07

## SOum-4

- Prescribed any of the following ATC: L01BA01, L04AX03, M01CX01

- 1  
2  
3 • Not prescribed ATC B03BB  
4

5 SOum-5  
6

- 7 • Prescribed ATC N02A (except N02AA55 and N02AX51)  
8  
9 • Not prescribed any of the following ATC: A06AB, A06AD, A06AH  
10  
11

12 SOum-6  
13

- 14 • Diagnosed with any of the following ICD-10: I20-25, I50  
15  
16 • Not prescribed ATC C09 (except C09X)  
17  
18

19 SOum-7  
20

- 21 • Diagnosed with ICD-10 I50  
22  
23 • Not prescribed any of the following ATC: C07AB02, C07AB07, C07AB12, C07AG02,  
24 C07BB02, C07BB07, C07BB12, C07BB22, C07BB27, C07BB52, C07BG02, C07CB02,  
25 C07CB22, C07FB02, C07FB07, C07FB12, C07FB13, C07FB22, C07FX03, C07FX04,  
26 C07FX05, C07FX06  
27  
28  
29  
30  
31

32 SOum-8  
33

- 34 • Diagnosed with any of the following ICD-10: J44-45  
35  
36 • Not prescribed any of the following ATC: R03AC, R03AK, R03AL, R03BB  
37  
38

39 SOum-9  
40

- 41 • Diagnosed with any of the following ICD-10: J44-45  
42  
43 • Not prescribed any of the following ATC: R03AK (except R03AK01, R03AK02,  
44 R03AK03, R03AK04 and R03AK05), R03AL08, R03AL09, R03BA  
45  
46  
47

48 SOum-10  
49

- 50 • Diagnosed with any of the following ICD-10: E10-11, E14  
51  
52 • Not prescribed ATC C09 (except C09X)  
53  
54  
55  
56  
57  
58  
59  
60

**Additional file 6. CONSORT 2010 checklist of information to include when reporting a cluster randomised trial**

| Section/Topic                    | Item No | Standard Checklist item                                                                                                                | Extension for cluster designs                                                                | Page No * |
|----------------------------------|---------|----------------------------------------------------------------------------------------------------------------------------------------|----------------------------------------------------------------------------------------------|-----------|
| <b>Title and abstract</b>        |         |                                                                                                                                        |                                                                                              |           |
|                                  | 1a      | Identification as a randomised trial in the title                                                                                      | Identification as a cluster randomised trial in the title                                    | 1         |
|                                  | 1b      | Structured summary of trial design, methods, results, and conclusions (for specific guidance see CONSORT for abstracts) <sup>1,2</sup> | See table 2                                                                                  | 6         |
| <b>Introduction</b>              |         |                                                                                                                                        |                                                                                              |           |
| <b>Background and objectives</b> | 2a      | Scientific background and explanation of rationale                                                                                     | Rationale for using a cluster design                                                         | 9         |
|                                  | 2b      | Specific objectives or hypotheses                                                                                                      | Whether objectives pertain to the cluster level, the individual participant level or both    | 10        |
| <b>Methods</b>                   |         |                                                                                                                                        |                                                                                              |           |
| <b>Trial design</b>              | 3a      | Description of trial design (such as parallel, factorial) including allocation ratio                                                   | Definition of cluster and description of how the design features apply to the clusters       | 11        |
|                                  | 3b      | Important changes to methods after trial commencement (such as eligibility criteria), with reasons                                     |                                                                                              | NA        |
| <b>Participants</b>              | 4a      | Eligibility criteria for participants                                                                                                  | Eligibility criteria for clusters                                                            | 11        |
|                                  | 4b      | Settings and locations where the data were collected                                                                                   |                                                                                              | 11        |
| <b>Interventions</b>             | 5       | The interventions for each group with sufficient details to allow replication, including how and when they were actually administered  | Whether interventions pertain to the cluster level, the individual participant level or both | 14        |
| <b>Outcomes</b>                  | 6a      | Completely defined pre-specified primary and                                                                                           | Whether outcome measures pertain to the cluster level, the                                   | 16        |

|                                         |     |                                                                                                                                                                                             |                                                                                                                                                                                                                         |       |
|-----------------------------------------|-----|---------------------------------------------------------------------------------------------------------------------------------------------------------------------------------------------|-------------------------------------------------------------------------------------------------------------------------------------------------------------------------------------------------------------------------|-------|
|                                         |     | secondary outcome measures, including how and when they were assessed                                                                                                                       | individual participant level or both                                                                                                                                                                                    |       |
|                                         | 6b  | Any changes to trial outcomes after the trial commenced, with reasons                                                                                                                       |                                                                                                                                                                                                                         | NA    |
| <b>Sample size</b>                      | 7a  | How sample size was determined                                                                                                                                                              | Method of calculation, number of clusters(s) (and whether equal or unequal cluster sizes are assumed), cluster size, a coefficient of intracluster correlation (ICC or <i>k</i> ), and an indication of its uncertainty | 21    |
|                                         | 7b  | When applicable, explanation of any interim analyses and stopping guidelines                                                                                                                |                                                                                                                                                                                                                         | 20    |
| <b>Randomisation:</b>                   |     |                                                                                                                                                                                             |                                                                                                                                                                                                                         |       |
| <b>Sequence generation</b>              | 8a  | Method used to generate the random allocation sequence                                                                                                                                      |                                                                                                                                                                                                                         | 13    |
|                                         | 8b  | Type of randomisation; details of any restriction (such as blocking and block size)                                                                                                         | Details of stratification or matching if used                                                                                                                                                                           | 13    |
| <b>Allocation concealment mechanism</b> | 9   | Mechanism used to implement the random allocation sequence (such as sequentially numbered containers), describing any steps taken to conceal the sequence until interventions were assigned | Specification that allocation was based on clusters rather than individuals and whether allocation concealment (if any) was at the cluster level, the individual participant level or both                              | 13    |
| <b>Implementation</b>                   | 10  | Who generated the random allocation sequence, who enrolled participants, and who assigned participants to interventions                                                                     | Replace by 10a, 10b and 10c                                                                                                                                                                                             | 12-14 |
|                                         | 10a |                                                                                                                                                                                             | Who generated the random allocation sequence, who enrolled clusters, and who assigned clusters to interventions                                                                                                         | 12-14 |

|                                                             |     |                                                                                                                                                                     |                                                                                                                                                   |
|-------------------------------------------------------------|-----|---------------------------------------------------------------------------------------------------------------------------------------------------------------------|---------------------------------------------------------------------------------------------------------------------------------------------------|
|                                                             | 10b | Mechanism by which individual participants were included in clusters for the purposes of the trial (such as complete enumeration, random sampling)                  | 12-14                                                                                                                                             |
|                                                             | 10c | From whom consent was sought (representatives of the cluster, or individual cluster members, or both), and whether consent was sought before or after randomisation | 12-14                                                                                                                                             |
| <b>Blinding</b>                                             |     |                                                                                                                                                                     |                                                                                                                                                   |
|                                                             | 11a | If done, who was blinded after assignment to interventions (for example, participants, care providers, those assessing outcomes) and how                            | 14                                                                                                                                                |
|                                                             | 11b | If relevant, description of the similarity of interventions                                                                                                         | NA                                                                                                                                                |
| <b>Statistical methods</b>                                  |     |                                                                                                                                                                     |                                                                                                                                                   |
|                                                             | 12a | Statistical methods used to compare groups for primary and secondary outcomes                                                                                       | How clustering was taken into account<br>21                                                                                                       |
|                                                             | 12b | Methods for additional analyses, such as subgroup analyses and adjusted analyses                                                                                    | NA                                                                                                                                                |
| <b>Results</b>                                              |     |                                                                                                                                                                     |                                                                                                                                                   |
| <b>Participant flow (a diagram is strongly recommended)</b> |     |                                                                                                                                                                     |                                                                                                                                                   |
|                                                             | 13a | For each group, the numbers of participants who were randomly assigned, received intended treatment, and were analysed for the primary outcome                      | For each group, the numbers of clusters that were randomly assigned, received intended treatment, and were analysed for the primary outcome<br>NA |
|                                                             | 13b | For each group, losses and exclusions after randomisation, together with reasons                                                                                    | For each group, losses and exclusions for both clusters and individual cluster members<br>NA                                                      |
| <b>Recruitment</b>                                          |     |                                                                                                                                                                     |                                                                                                                                                   |
|                                                             | 14a | Dates defining the periods of recruitment and follow-up                                                                                                             | NA                                                                                                                                                |

|                                |     |                                                                                                                                                   |                                                                                                                                               |    |
|--------------------------------|-----|---------------------------------------------------------------------------------------------------------------------------------------------------|-----------------------------------------------------------------------------------------------------------------------------------------------|----|
|                                | 14b | Why the trial ended or was stopped                                                                                                                |                                                                                                                                               | NA |
| <b>Baseline data</b>           | 15  | A table showing baseline demographic and clinical characteristics for each group                                                                  | Baseline characteristics for the individual and cluster levels as applicable for each group                                                   | NA |
| <b>Numbers analysed</b>        | 16  | For each group, number of participants (denominator) included in each analysis and whether the analysis was by original assigned groups           | For each group, number of clusters included in each analysis                                                                                  | NA |
| <b>Outcomes and estimation</b> | 17a | For each primary and secondary outcome, results for each group, and the estimated effect size and its precision (such as 95% confidence interval) | Results at the individual or cluster level as applicable and a coefficient of intracluster correlation (ICC or $k$ ) for each primary outcome | NA |
|                                | 17b | For binary outcomes, presentation of both absolute and relative effect sizes is recommended                                                       |                                                                                                                                               | NA |
| <b>Ancillary analyses</b>      | 18  | Results of any other analyses performed, including subgroup analyses and adjusted analyses, distinguishing pre-specified from exploratory         |                                                                                                                                               | NA |
| <b>Harms</b>                   | 19  | All important harms or unintended effects in each group (for specific guidance see CONSORT for harms <sup>3</sup> )                               |                                                                                                                                               | NA |
| <b>Discussion</b>              |     |                                                                                                                                                   |                                                                                                                                               | 25 |
| <b>Limitations</b>             | 20  | Trial limitations, addressing sources of potential bias, imprecision, and, if relevant, multiplicity of analyses                                  |                                                                                                                                               | 25 |
| <b>Generalisability</b>        | 21  | Generalisability (external validity, applicability) of the trial findings                                                                         | Generalisability to clusters and/or individual participants (as relevant)                                                                     | NA |
| <b>Interpretation</b>          | 22  | Interpretation consistent with results, balancing benefits and harms, and                                                                         |                                                                                                                                               | NA |



|                          |    |                                                                                 |    |
|--------------------------|----|---------------------------------------------------------------------------------|----|
|                          |    | considering other relevant evidence                                             |    |
| <b>Other information</b> |    |                                                                                 |    |
| <b>Registration</b>      | 23 | Registration number and name of trial registry                                  | 7  |
| <b>Protocol</b>          | 24 | Where the full trial protocol can be accessed, if available                     | NA |
| <b>Funding</b>           | 25 | Sources of funding and other support (such as supply of drugs), role of funders | 26 |

\* Note: page numbers optional depending on journal requirements

## REFERENCES

- 1 Hopewell S, Clarke M, Moher D, Wager E, Middleton P, Altman DG, et al. CONSORT for reporting randomised trials in journal and conference abstracts. *Lancet* 2008, 371:281-283
- 2 Hopewell S, Clarke M, Moher D, Wager E, Middleton P, Altman DG at al (2008) CONSORT for reporting randomized controlled trials in journal and conference abstracts: explanation and elaboration. *PLoS Med* 5(1): e20
- 3 Ioannidis JP, Evans SJ, Gotzsche PC, O'Neill RT, Altman DG, Schulz K, Moher D. Better reporting of harms in randomized trials: an extension of the CONSORT statement. *Ann Intern Med* 2004; 141(10):781-788.

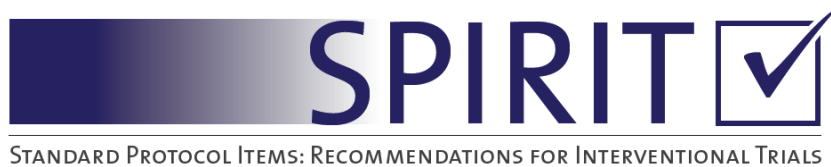

Additional file 7. SPIRIT 2013 Checklist: Recommended items to address in a clinical trial protocol and related documents\*

| Section/item                      | Item No | Description                                                                                                                                                                                                                                                                              | Page  |
|-----------------------------------|---------|------------------------------------------------------------------------------------------------------------------------------------------------------------------------------------------------------------------------------------------------------------------------------------------|-------|
| <b>Administrative information</b> |         |                                                                                                                                                                                                                                                                                          |       |
| Title                             | 1       | Descriptive title identifying the study design, population, interventions, and, if applicable, trial acronym                                                                                                                                                                             | 1     |
| Trial registration                | 2a      | Trial identifier and registry name. If not yet registered, name of intended registry                                                                                                                                                                                                     | 8     |
|                                   | 2b      | All items from the World Health Organization Trial Registration Data Set                                                                                                                                                                                                                 | 8     |
| Protocol version                  | 3       | Date and version identifier                                                                                                                                                                                                                                                              | 34    |
| Funding                           | 4       | Sources and types of financial, material, and other support                                                                                                                                                                                                                              | 34    |
| Roles and responsibilities        | 5a      | Names, affiliations, and roles of protocol contributors                                                                                                                                                                                                                                  | 33    |
|                                   | 5b      | Name and contact information for the trial sponsor                                                                                                                                                                                                                                       | 33-34 |
|                                   | 5c      | Role of study sponsor and funders, if any, in study design; collection, management, analysis, and interpretation of data; writing of the report; and the decision to submit the report for publication, including whether they will have ultimate authority over any of these activities | 34    |
|                                   | 5d      | Composition, roles, and responsibilities of the coordinating centre, steering committee, endpoint adjudication committee, data management team, and other individuals or groups overseeing the trial, if applicable (see Item 21a for data monitoring committee)                         | 33    |

**Introduction**

|    |                                                           |     |                                                                                                                                                                                                                                                                                                                                                                                |                            |
|----|-----------------------------------------------------------|-----|--------------------------------------------------------------------------------------------------------------------------------------------------------------------------------------------------------------------------------------------------------------------------------------------------------------------------------------------------------------------------------|----------------------------|
| 1  |                                                           |     |                                                                                                                                                                                                                                                                                                                                                                                |                            |
| 2  | Background and rationale                                  | 6a  | Description of research question and justification for undertaking the trial, including summary of relevant studies (published and unpublished) examining benefits and harms for each intervention                                                                                                                                                                             | 11-13                      |
| 3  |                                                           |     |                                                                                                                                                                                                                                                                                                                                                                                |                            |
| 4  |                                                           |     |                                                                                                                                                                                                                                                                                                                                                                                |                            |
| 5  |                                                           |     |                                                                                                                                                                                                                                                                                                                                                                                |                            |
| 6  |                                                           |     |                                                                                                                                                                                                                                                                                                                                                                                |                            |
| 7  |                                                           | 6b  | Explanation for choice of comparators                                                                                                                                                                                                                                                                                                                                          | 11-13                      |
| 8  |                                                           |     |                                                                                                                                                                                                                                                                                                                                                                                |                            |
| 9  | Objectives                                                | 7   | Specific objectives or hypotheses                                                                                                                                                                                                                                                                                                                                              | 12-13                      |
| 10 |                                                           |     |                                                                                                                                                                                                                                                                                                                                                                                |                            |
| 11 | Trial design                                              | 8   | Description of trial design including type of trial (eg, parallel group, crossover, factorial, single group), allocation ratio, and framework (eg, superiority, equivalence, noninferiority, exploratory)                                                                                                                                                                      | 13-14                      |
| 12 |                                                           |     |                                                                                                                                                                                                                                                                                                                                                                                |                            |
| 13 |                                                           |     |                                                                                                                                                                                                                                                                                                                                                                                |                            |
| 14 |                                                           |     |                                                                                                                                                                                                                                                                                                                                                                                |                            |
| 15 |                                                           |     |                                                                                                                                                                                                                                                                                                                                                                                |                            |
| 16 |                                                           |     |                                                                                                                                                                                                                                                                                                                                                                                |                            |
| 17 |                                                           |     |                                                                                                                                                                                                                                                                                                                                                                                |                            |
| 18 | <b>Methods: Participants, interventions, and outcomes</b> |     |                                                                                                                                                                                                                                                                                                                                                                                |                            |
| 19 | Study setting                                             | 9   | Description of study settings (eg, community clinic, academic hospital) and list of countries where data will be collected. Reference to where list of study sites can be obtained                                                                                                                                                                                             | 13-14                      |
| 20 |                                                           |     |                                                                                                                                                                                                                                                                                                                                                                                |                            |
| 21 |                                                           |     |                                                                                                                                                                                                                                                                                                                                                                                |                            |
| 22 |                                                           |     |                                                                                                                                                                                                                                                                                                                                                                                |                            |
| 23 |                                                           |     |                                                                                                                                                                                                                                                                                                                                                                                |                            |
| 24 |                                                           |     |                                                                                                                                                                                                                                                                                                                                                                                |                            |
| 25 | Eligibility criteria                                      | 10  | Inclusion and exclusion criteria for participants. If applicable, eligibility criteria for study centres and individuals who will perform the interventions (eg, surgeons, psychotherapists)                                                                                                                                                                                   | 13-14                      |
| 26 |                                                           |     |                                                                                                                                                                                                                                                                                                                                                                                |                            |
| 27 |                                                           |     |                                                                                                                                                                                                                                                                                                                                                                                |                            |
| 28 |                                                           |     |                                                                                                                                                                                                                                                                                                                                                                                |                            |
| 29 |                                                           |     |                                                                                                                                                                                                                                                                                                                                                                                |                            |
| 30 |                                                           |     |                                                                                                                                                                                                                                                                                                                                                                                |                            |
| 31 | Interventions                                             | 11a | Interventions for each group with sufficient detail to allow replication, including how and when they will be administered                                                                                                                                                                                                                                                     | 17-19<br>Additional file 3 |
| 32 |                                                           |     |                                                                                                                                                                                                                                                                                                                                                                                |                            |
| 33 |                                                           |     |                                                                                                                                                                                                                                                                                                                                                                                |                            |
| 34 |                                                           |     |                                                                                                                                                                                                                                                                                                                                                                                |                            |
| 35 |                                                           | 11b | Criteria for discontinuing or modifying allocated interventions for a given trial participant (eg, drug dose change in response to harms, participant request, or improving/worsening disease)                                                                                                                                                                                 | 23                         |
| 36 |                                                           |     |                                                                                                                                                                                                                                                                                                                                                                                |                            |
| 37 |                                                           |     |                                                                                                                                                                                                                                                                                                                                                                                |                            |
| 38 |                                                           |     |                                                                                                                                                                                                                                                                                                                                                                                |                            |
| 39 |                                                           |     |                                                                                                                                                                                                                                                                                                                                                                                |                            |
| 40 |                                                           |     |                                                                                                                                                                                                                                                                                                                                                                                |                            |
| 41 |                                                           | 11c | Strategies to improve adherence to intervention protocols, and any procedures for monitoring adherence (eg, drug tablet return, laboratory tests)                                                                                                                                                                                                                              | 17-19                      |
| 42 |                                                           |     |                                                                                                                                                                                                                                                                                                                                                                                |                            |
| 43 |                                                           |     |                                                                                                                                                                                                                                                                                                                                                                                |                            |
| 44 |                                                           |     |                                                                                                                                                                                                                                                                                                                                                                                |                            |
| 45 |                                                           | 11d | Relevant concomitant care and interventions that are permitted or prohibited during the trial                                                                                                                                                                                                                                                                                  | 17-19                      |
| 46 |                                                           |     |                                                                                                                                                                                                                                                                                                                                                                                |                            |
| 47 |                                                           |     |                                                                                                                                                                                                                                                                                                                                                                                |                            |
| 48 | Outcomes                                                  | 12  | Primary, secondary, and other outcomes, including the specific measurement variable (eg, systolic blood pressure), analysis metric (eg, change from baseline, final value, time to event), method of aggregation (eg, median, proportion), and time point for each outcome. Explanation of the clinical relevance of chosen efficacy and harm outcomes is strongly recommended | 19-21                      |
| 49 |                                                           |     |                                                                                                                                                                                                                                                                                                                                                                                |                            |
| 50 |                                                           |     |                                                                                                                                                                                                                                                                                                                                                                                |                            |
| 51 |                                                           |     |                                                                                                                                                                                                                                                                                                                                                                                |                            |
| 52 |                                                           |     |                                                                                                                                                                                                                                                                                                                                                                                |                            |
| 53 |                                                           |     |                                                                                                                                                                                                                                                                                                                                                                                |                            |
| 54 |                                                           |     |                                                                                                                                                                                                                                                                                                                                                                                |                            |
| 55 |                                                           |     |                                                                                                                                                                                                                                                                                                                                                                                |                            |
| 56 |                                                           |     |                                                                                                                                                                                                                                                                                                                                                                                |                            |
| 57 |                                                           |     |                                                                                                                                                                                                                                                                                                                                                                                |                            |
| 58 |                                                           |     |                                                                                                                                                                                                                                                                                                                                                                                |                            |
| 59 |                                                           |     |                                                                                                                                                                                                                                                                                                                                                                                |                            |
| 60 |                                                           |     |                                                                                                                                                                                                                                                                                                                                                                                |                            |

|    |             |    |                                                |          |
|----|-------------|----|------------------------------------------------|----------|
| 1  |             |    |                                                |          |
| 2  | Participant | 13 | Time schedule of enrolment, interventions      | 16       |
| 3  | timeline    |    | (including any run-ins and washouts),          | Figure 2 |
| 4  |             |    | assessments, and visits for participants. A    |          |
| 5  |             |    | schematic diagram is highly recommended (see   |          |
| 6  |             |    | Figure)                                        |          |
| 7  |             |    |                                                |          |
| 8  | Sample size | 14 | Estimated number of participants needed to     | 24       |
| 9  |             |    | achieve study objectives and how it was        |          |
| 10 |             |    | determined, including clinical and statistical |          |
| 11 |             |    | assumptions supporting any sample size         |          |
| 12 |             |    | calculations                                   |          |
| 13 |             |    |                                                |          |
| 14 |             |    |                                                |          |
| 15 | Recruitment | 15 | Strategies for achieving adequate participant  | 24       |
| 16 |             |    | enrolment to reach target sample size          |          |
| 17 |             |    |                                                |          |
| 18 |             |    |                                                |          |

### Methods: Assignment of interventions (for controlled trials)

#### Allocation:

|    |            |     |                                                        |           |
|----|------------|-----|--------------------------------------------------------|-----------|
| 22 |            |     |                                                        |           |
| 23 | Sequence   | 16a | Method of generating the allocation sequence (eg,      | 16, 24-25 |
| 24 | generation |     | computer-generated random numbers), and list of        |           |
| 25 |            |     | any factors for stratification. To reduce              |           |
| 26 |            |     | predictability of a random sequence, details of any    |           |
| 27 |            |     | planned restriction (eg, blocking) should be           |           |
| 28 |            |     | provided in a separate document that is                |           |
| 29 |            |     | unavailable to those who enrol participants or         |           |
| 30 |            |     | assign interventions                                   |           |
| 31 |            |     |                                                        |           |
| 32 |            |     |                                                        |           |
| 33 | Allocation | 16b | Mechanism of implementing the allocation               | 16, 24-25 |
| 34 | concealme  |     | sequence (eg, central telephone; sequentially          |           |
| 35 | nt         |     | numbered, opaque, sealed envelopes), describing        |           |
| 36 | mechanis   |     | any steps to conceal the sequence until                |           |
| 37 | m          |     | interventions are assigned                             |           |
| 38 |            |     |                                                        |           |
| 39 |            |     |                                                        |           |
| 40 | Implement  | 16c | Who will generate the allocation sequence, who         | 16, 24-25 |
| 41 | ation      |     | will enrol participants, and who will assign           |           |
| 42 |            |     | participants to interventions                          |           |
| 43 |            |     |                                                        |           |
| 44 |            |     |                                                        |           |
| 45 | Blinding   | 17a | Who will be blinded after assignment to                |           |
| 46 | (masking)  |     | interventions (eg, trial participants, care providers, |           |
| 47 |            |     | outcome assessors, data analysts), and how             |           |
| 48 |            |     |                                                        |           |
| 49 |            | 17b | If blinded, circumstances under which unblinding is    |           |
| 50 |            |     | permissible, and procedure for revealing a             |           |
| 51 |            |     | participant's allocated intervention during the trial  |           |
| 52 |            |     |                                                        |           |
| 53 |            |     |                                                        |           |

### Methods: Data collection, management, and analysis

|    |             |     |                                                        |       |
|----|-------------|-----|--------------------------------------------------------|-------|
| 1  |             |     |                                                        |       |
| 2  | Data        | 18a | Plans for assessment and collection of outcome,        | 22-24 |
| 3  | collection  |     | baseline, and other trial data, including any related  |       |
| 4  | methods     |     | processes to promote data quality (eg, duplicate       |       |
| 5  |             |     | measurements, training of assessors) and a             |       |
| 6  |             |     | description of study instruments (eg,                  |       |
| 7  |             |     | questionnaires, laboratory tests) along with their     |       |
| 8  |             |     | reliability and validity, if known. Reference to where |       |
| 9  |             |     | data collection forms can be found, if not in the      |       |
| 10 |             |     | protocol                                               |       |
| 11 |             |     |                                                        |       |
| 12 |             |     |                                                        |       |
| 13 |             | 18b | Plans to promote participant retention and             | 22-24 |
| 14 |             |     | complete follow-up, including list of any outcome      |       |
| 15 |             |     | data to be collected for participants who              |       |
| 16 |             |     | discontinue or deviate from intervention protocols     |       |
| 17 |             |     |                                                        |       |
| 18 |             |     |                                                        |       |
| 19 | Data        | 19  | Plans for data entry, coding, security, and storage,   | 22-24 |
| 20 | management  |     | including any related processes to promote data        |       |
| 21 |             |     | quality (eg, double data entry; range checks for       |       |
| 22 |             |     | data values). Reference to where details of data       |       |
| 23 |             |     | management procedures can be found, if not in the      |       |
| 24 |             |     | protocol                                               |       |
| 25 |             |     |                                                        |       |
| 26 |             |     |                                                        |       |
| 27 | Statistical | 20a | Statistical methods for analysing primary and          | 24-25 |
| 28 | methods     |     | secondary outcomes. Reference to where other           |       |
| 29 |             |     | details of the statistical analysis plan can be found, |       |
| 30 |             |     | if not in the protocol                                 |       |
| 31 |             |     |                                                        |       |
| 32 |             |     |                                                        |       |
| 33 |             | 20b | Methods for any additional analyses (eg, subgroup      | 24-25 |
| 34 |             |     | and adjusted analyses)                                 |       |
| 35 |             |     |                                                        |       |
| 36 |             | 20c | Definition of analysis population relating to protocol | 24-25 |
| 37 |             |     | non-adherence (eg, as randomised analysis), and        |       |
| 38 |             |     | any statistical methods to handle missing data (eg,    |       |
| 39 |             |     | multiple imputation)                                   |       |
| 40 |             |     |                                                        |       |
| 41 |             |     |                                                        |       |

### Methods: Monitoring

|    |            |     |                                                     |       |
|----|------------|-----|-----------------------------------------------------|-------|
| 42 |            |     |                                                     |       |
| 43 |            |     |                                                     |       |
| 44 | Data       | 21a | Composition of data monitoring committee (DMC);     | 21-22 |
| 45 | monitoring |     | summary of its role and reporting structure;        |       |
| 46 |            |     | statement of whether it is independent from the     |       |
| 47 |            |     | sponsor and competing interests; and reference to   |       |
| 48 |            |     | where further details about its charter can be      |       |
| 49 |            |     | found, if not in the protocol. Alternatively, an    |       |
| 50 |            |     | explanation of why a DMC is not needed              |       |
| 51 |            |     |                                                     |       |
| 52 |            |     |                                                     |       |
| 53 |            | 21b | Description of any interim analyses and stopping    | 21-22 |
| 54 |            |     | guidelines, including who will have access to these |       |
| 55 |            |     | interim results and make the final decision to      |       |
| 56 |            |     | terminate the trial                                 |       |
| 57 |            |     |                                                     |       |
| 58 |            |     |                                                     |       |
| 59 |            |     |                                                     |       |
| 60 |            |     |                                                     |       |

|    |                                 |     |                                                        |       |
|----|---------------------------------|-----|--------------------------------------------------------|-------|
| 1  |                                 |     |                                                        |       |
| 2  | Harms                           | 22  | Plans for collecting, assessing, reporting, and        | 21-22 |
| 3  |                                 |     | managing solicited and spontaneously reported          |       |
| 4  |                                 |     | adverse events and other unintended effects of         |       |
| 5  |                                 |     | trial interventions or trial conduct                   |       |
| 6  |                                 |     |                                                        |       |
| 7  | Auditing                        | 23  | Frequency and procedures for auditing trial            | 21-22 |
| 8  |                                 |     | conduct, if any, and whether the process will be       |       |
| 9  |                                 |     | independent from investigators and the sponsor         |       |
| 10 |                                 |     |                                                        |       |
| 11 |                                 |     |                                                        |       |
| 12 | <b>Ethics and dissemination</b> |     |                                                        |       |
| 13 |                                 |     |                                                        |       |
| 14 | Research                        | 24  | Plans for seeking research ethics                      | 27    |
| 15 | ethics                          |     | committee/institutional review board (REC/IRB)         |       |
| 16 | approval                        |     | approval                                               |       |
| 17 |                                 |     |                                                        |       |
| 18 | Protocol                        | 25  | Plans for communicating important protocol             | 27    |
| 19 | amendments                      |     | modifications (eg, changes to eligibility criteria,    |       |
| 20 |                                 |     | outcomes, analyses) to relevant parties (eg,           |       |
| 21 |                                 |     | investigators, REC/IRBs, trial participants, trial     |       |
| 22 |                                 |     | registries, journals, regulators)                      |       |
| 23 |                                 |     |                                                        |       |
| 24 |                                 |     |                                                        |       |
| 25 | Consent or                      | 26a | Who will obtain informed consent or assent from        | 17-19 |
| 26 | assent                          |     | potential trial participants or authorised surrogates, |       |
| 27 |                                 |     | and how (see Item 32)                                  |       |
| 28 |                                 |     |                                                        |       |
| 29 |                                 |     |                                                        |       |
| 30 |                                 | 26b | Additional consent provisions for collection and use   | 17-19 |
| 31 |                                 |     | of participant data and biological specimens in        |       |
| 32 |                                 |     | ancillary studies, if applicable                       |       |
| 33 |                                 |     |                                                        |       |
| 34 | Confidentialit                  | 27  | How personal information about potential and           | 22    |
| 35 | y                               |     | enrolled participants will be collected, shared, and   |       |
| 36 |                                 |     | maintained in order to protect confidentiality         |       |
| 37 |                                 |     | before, during, and after the trial                    |       |
| 38 |                                 |     |                                                        |       |
| 39 |                                 |     |                                                        |       |
| 40 | Declaration of                  | 28  | Financial and other competing interests for            | 34    |
| 41 | interests                       |     | principal investigators for the overall trial and each |       |
| 42 |                                 |     | study site                                             |       |
| 43 |                                 |     |                                                        |       |
| 44 | Access to                       | 29  | Statement of who will have access to the final trial   | 34    |
| 45 | data                            |     | dataset, and disclosure of contractual agreements      |       |
| 46 |                                 |     | that limit such access for investigators               |       |
| 47 |                                 |     |                                                        |       |
| 48 |                                 |     |                                                        |       |
| 49 | Ancillary and                   | 30  | Provisions, if any, for ancillary and post-trial care, | 21-22 |
| 50 | post-trial care                 |     | and for compensation to those who suffer harm          |       |
| 51 |                                 |     | from trial participation                               |       |
| 52 |                                 |     |                                                        |       |
| 53 |                                 |     |                                                        |       |
| 54 |                                 |     |                                                        |       |
| 55 |                                 |     |                                                        |       |
| 56 |                                 |     |                                                        |       |
| 57 |                                 |     |                                                        |       |
| 58 |                                 |     |                                                        |       |
| 59 |                                 |     |                                                        |       |
| 60 |                                 |     |                                                        |       |

|    |                            |     |                                                                                                                                                                                                                                                                                     |                   |
|----|----------------------------|-----|-------------------------------------------------------------------------------------------------------------------------------------------------------------------------------------------------------------------------------------------------------------------------------------|-------------------|
| 1  |                            |     |                                                                                                                                                                                                                                                                                     |                   |
| 2  | Dissemination policy       | 31a | Plans for investigators and sponsor to communicate trial results to participants, healthcare professionals, the public, and other relevant groups (eg, via publication, reporting in results databases, or other data sharing arrangements), including any publication restrictions | 28                |
| 3  |                            |     |                                                                                                                                                                                                                                                                                     |                   |
| 4  |                            |     |                                                                                                                                                                                                                                                                                     |                   |
| 5  |                            |     |                                                                                                                                                                                                                                                                                     |                   |
| 6  |                            |     |                                                                                                                                                                                                                                                                                     |                   |
| 7  |                            |     |                                                                                                                                                                                                                                                                                     |                   |
| 8  |                            |     |                                                                                                                                                                                                                                                                                     |                   |
| 9  |                            |     |                                                                                                                                                                                                                                                                                     |                   |
| 10 |                            |     |                                                                                                                                                                                                                                                                                     |                   |
| 11 |                            | 31b | Authorship eligibility guidelines and any intended use of professional writers                                                                                                                                                                                                      | nr                |
| 12 |                            |     |                                                                                                                                                                                                                                                                                     |                   |
| 13 |                            |     |                                                                                                                                                                                                                                                                                     |                   |
| 14 |                            | 31c | Plans, if any, for granting public access to the full protocol, participant-level dataset, and statistical code                                                                                                                                                                     | 34                |
| 15 |                            |     |                                                                                                                                                                                                                                                                                     |                   |
| 16 |                            |     |                                                                                                                                                                                                                                                                                     |                   |
| 17 |                            |     |                                                                                                                                                                                                                                                                                     |                   |
| 18 |                            |     |                                                                                                                                                                                                                                                                                     |                   |
| 19 | <b>Appendices</b>          |     |                                                                                                                                                                                                                                                                                     |                   |
| 20 |                            |     |                                                                                                                                                                                                                                                                                     |                   |
| 21 | Informed consent materials | 32  | Model consent form and other related documentation given to participants and authorised surrogates                                                                                                                                                                                  | Additional file 5 |
| 22 |                            |     |                                                                                                                                                                                                                                                                                     |                   |
| 23 |                            |     |                                                                                                                                                                                                                                                                                     |                   |
| 24 |                            |     |                                                                                                                                                                                                                                                                                     |                   |
| 25 |                            |     |                                                                                                                                                                                                                                                                                     |                   |
| 26 | Biological specimens       | 33  | Plans for collection, laboratory evaluation, and storage of biological specimens for genetic or molecular analysis in the current trial and for future use in ancillary studies, if applicable                                                                                      | nr                |
| 27 |                            |     |                                                                                                                                                                                                                                                                                     |                   |
| 28 |                            |     |                                                                                                                                                                                                                                                                                     |                   |
| 29 |                            |     |                                                                                                                                                                                                                                                                                     |                   |
| 30 |                            |     |                                                                                                                                                                                                                                                                                     |                   |

31 \*It is strongly recommended that this checklist be read in conjunction with the SPIRIT 2013  
 32 Explanation & Elaboration for important clarification on the items. Amendments to the  
 33 protocol should be tracked and dated. The SPIRIT checklist is copyrighted by the SPIRIT  
 34 Group under the Creative Commons "[Attribution-NonCommercial-NoDerivs 3.0 Unported](https://creativecommons.org/licenses/by-nc-nd/3.0/)"  
 35 license.  
 36  
 37  
 38  
 39  
 40  
 41  
 42  
 43  
 44  
 45  
 46  
 47  
 48  
 49  
 50  
 51  
 52  
 53  
 54  
 55  
 56  
 57  
 58  
 59  
 60
