# Supplementary material for: Effectiveness of the application of an electronic medication management support system in patients with polypharmacy in general practice: a study protocol of cluster-randomised controlled trial (AdAM)
Source: PubMed Central journal article supplement — BMJ Open. 2021 Sep 28;11(9):e048191. doi: 10.1136/bmjopen-2020-048191 (PMC8479941; doi:10.1136/bmjopen-2020-048191), 2021-09-28
Supplement: bmjopen-2020-048191supp005.pdf [file bmjopen-2020-048191supp005.pdf]

**Additional file 5. Specifications related to the secondary outcome measures**

Each of the condition listed (•) must be met for the respective secondary outcome to be fulfilled.

SO<sub>pim</sub>-1:

- Diagnosed with any of the following ICD-10: K20-21, K25-28
- Prescribed ATC M01A (except M01AB55 and M01AE52)
- Not prescribed ATC A02B

SO<sub>pim</sub>-2:

- Age 65+
- Prescribed ATC M01A (except M01AB55 and M01AE52)
- Not prescribed ATC A02B

SO<sub>pim</sub>-3

- Prescribed ATC B01AC
- Prescribed ATC M01A (except M01AB55 and M01AE52)
- Not prescribed ATC A02B

SO<sub>pim</sub>-4

- Prescribed either ATC B01AC34 or a combination of ATC B01AC06 with any of the following

ATC: B01AC04, B01AC24, B01AC22

- Not prescribed ATC A02B

SO<sub>pim</sub>-5

- Prescribed any of the following ATC: B01AA, B01AE, B01AF
- Prescribed ATC M01A (except M01AB55 and M01AE52)
- Not prescribed ATC A02B

SO<sub>pim</sub>-6

- Prescribed ATC B01AA

- Prescribed ATC B01AC
- Not prescribed ATC A02B

## SOpim-7

- Prescribed any of the following ATC: G04BX18, N06AB, N06AX16, N06AX17, N06AX21
- Prescribed ATC M01A (except M01AB55 and M01AE52)
- Not prescribed ATC A02B

## SOpim-8

- Prescribed any of the following ATC: H02AB, H02BX
- Prescribed ATC M01A (except M01AB55 and M01AE52)
- Not prescribed ATC A02B

## SOpim-9

- Prescribed ATC C09
- Prescribed ATC M01

## SOpim-10

- Prescribed any of the following ATC: C03AA, C03BA, C03CA, C03D, C03E
- Prescribed ATC M01A

## SOpim-11

- Diagnosed with ICD-10 I50
- Prescribed ATC M01A

## SOpim-12

- Diagnosed with ICD-10 I50
- Prescribed ATC N06AA

## SOpim-13

- Prescribed any of the following ATC: C03D, C09
- Prescribed ATC A12BA

## SOpim-14

- Diagnosed with ICD-10 I50
- Prescribed any of the following ATC: C07AA, C07BA, C07DA, S01ED (except S01ED02)

## SOpim-15

- Age 65+
- Prescribed any of the following ATC: A03FA03, A04AA01, B01AC23, C01BC04, C01BD01, C01BD07, C07AA07, C08DA81, H01BA04, L01XE12, L01XX35, N05AA02, N05AC02, N05AD01, N05AD08, N05AF03, N05AG02, N05AL01, N06AB04, N06AB10, N06DA02, N07BC02, P01BA01, P01BA02

## SOpim-16

- Any of the following:
  1.
    - Prescribed any two of the following ATC: A03FA03, A04AA01, B01AC23, C01BC04, C01BD01, C01BD07, C07AA07, C08DA81, H01BA04, L01XE12, L01XX35, N05AA02, N05AC02, N05AD01, N05AD08, N05AF03, N05AG02, N05AL01, N06AB04, N06AB10, N06DA02, N07BC02, P01BA01, P01BA02
  2.
    - Prescribed any of the following ATC: C01BC04, N05AC02, N06DA02, A04AA01, N05AD01, N06AB04, N06AB10
    - Prescribed any of the following ATC: A08AA62, N06AX12, N07BA02, H05BX01, N06AB03, N06AB05, C08DA81
  3.
    - Prescribed any of the following ATC: A04AA01, N05AD01, N06AB04, N06AB10, A03FA03, B01AC23, C08DA81, N05AG02, N07BC02
    - Prescribed any of the following ATC: A02BD04, A02BD05, J01FA09, J05AE02, J02AC02, J02AB02, J05AE03, J05AP53, J05AR10, J05AE01, L01XX47, L01XE42, J01FA15

4.

- Diagnosed with any of the following ICD-10: I50, R00.1, I49.5, I49.8
- Prescribed any of the following ATC: A03FA03, A04AA01, B01AC23, C01BC04, C01BD01, C01BD07, C07AA07, C08DA81, H01BA04, L01XE12, L01XX35, N05AA02, N05AC02, N05AD01, N05AD08, N05AF03, N05AG02, N05AL01, N06AB04, N06AB10, N06DA02, N07BC02, P01BA01, P01BA02

SOpim-17

- Prescribed ATC C01AA
- Prescribed any of the following ATC: C03AA, C03BA, C03CA, C07B, C07C, C08GA23, C09BA, C09BX01, C09BX03, C09DA, C09DX01, C09DX03, C09DX06, C09DX07, C09XA52, C09XA54
- Not prescribed ATC A12BA

SOpim-18

- Age 65+
- Prescribed any of the following ATC: A03CA02, C04AD03, C04AE01, C04AE02, C04AE04, C04AE54, C04AX01, C04AX07, C04AX10, C04AX17, C04AX20, C04AX21, C05CA05, C05CA07, C05CA51, C05CA54, M03BA02, M03BA03, M03BC01, M03BX01, M03BX02, M03BX07, M03BX08, N02AB02, N03AE01, N04AA01, N04AA02, N04AA12, N04AC01, N04BB01, N04BC08, N05AA01, N05AA02, N05AA04, N05BA05, N05AB02, N05AB03, N05AB04, N05AC01, N05AC02, N05AD01, N05AD08, N05AE03, N05AF05, N05AG02, N05AH02, N05AH03, N05BA01, N05BA02, N05BA03, N05BA04, N05BA05, N05BA06, N05BA08, N05BA09, N05BA11, N05BA12, N05BA13, N05BA16, N05BA18, N05BA21, N05CD01, N05CD02, N05CD03, N05CD04, N05CD05, N05CD06, N05CD07, N05CD08, N05CD09, N05CD10, N05CD11, N05CF01, N05CF02, N05CF03, N06AA01, N06AA02, N06AA04, N06AA06, N06AA09, N06AA10, N06AA12, N06AA21, N06AB05, N06AB08, N06AX16, N06DX02

## SOpm-19

- Diagnosed with any of the following ICD-10: G20-23
- Prescribed any of the following ATC: A03CA02, C04AD03, C04AE01, C04AE02, C04AE04, C04AE54, C04AX01, C04AX07, C04AX10, C04AX17, C04AX20, C04AX21, C05CA05, C05CA07, C05CA51, C05CA54, M03BA02, M03BA03, M03BC01, M03BX01, M03BX02, M03BX07, M03BX08, N02AB02, N03AE01, N04AA01, N04AA02, N04AA12, N04AC01, N04BB01, N04BC08, N05AA01, N05AA02, N05AA04, N05BA05, N05AB02, N05AB03, N05AB04, N05AC01, N05AC02, N05AD01, N05AD08, N05AE03, N05AF05, N05AG02, N05AH02, N05AH03, N05BA01, N05BA02, N05BA03, N05BA04, N05BA05, N05BA06, N05BA08, N05BA09, N05BA11, N05BA12, N05BA13, N05BA16, N05BA18, N05BA21, N05CD01, N05CD02, N05CD03, N05CD04, N05CD05, N05CD06, N05CD07, N05CD08, N05CD09, N05CD10, N05CD11, N05CF01, N05CF02, N05CF03, N06AA01, N06AA02, N06AA04, N06AA06, N06AA09, N06AA10, N06AA12, N06AA21, N06AB05, N06AB08, N06AX16, N06DX02

## SOum-1

- Diagnosed with ICD-10 I48
- Not prescribed any of the following ATC: B01AA, B01AE, B01AF

## SOum-2

- Diagnosed with any of the following ICD-10: I20-I22, I24-25, I63-66, I69, I70-72, I74
- Not prescribed any of the following ATC: B01AC04, B01AC06, B01AC22, B01AC24, B01AC34, B01AC36

## SOum-3

- Diagnosed with any of the following ICD-10: I20-25
- Not prescribed ATC C07

## SOum-4

- Prescribed any of the following ATC: L01BA01, L04AX03, M01CX01

- Not prescribed ATC B03BB

## SOum-5

- Prescribed ATC N02A (except N02AA55 and N02AX51)
- Not prescribed any of the following ATC: A06AB, A06AD, A06AH

## SOum-6

- Diagnosed with any of the following ICD-10: I20-25, I50
- Not prescribed ATC C09 (except C09X)

## SOum-7

- Diagnosed with ICD-10 I50
- Not prescribed any of the following ATC: C07AB02, C07AB07, C07AB12, C07AG02, C07BB02, C07BB07, C07BB12, C07BB22, C07BB27, C07BB52, C07BG02, C07CB02, C07CB22, C07FB02, C07FB07, C07FB12, C07FB13, C07FB22, C07FX03, C07FX04, C07FX05, C07FX06

## SOum-8

- Diagnosed with any of the following ICD-10: J44-45
- Not prescribed any of the following ATC: R03AC, R03AK, R03AL, R03BB

## SOum-9

- Diagnosed with any of the following ICD-10: J44-45
- Not prescribed any of the following ATC: R03AK (except R03AK01, R03AK02, R03AK03, R03AK04 and R03AK05), R03AL08, R03AL09, R03BA

## SOum-10

- Diagnosed with any of the following ICD-10: E10-11, E14
- Not prescribed ATC C09 (except C09X)
